# Supplementary Information

## Contents

|            |                                                            |    |
|------------|------------------------------------------------------------|----|
| SI 1-      | Archaeological context of newly reported individuals ..... | 2  |
| SI 2-      | Experimental procedures .....                              | 63 |
| SI 3-      | Y-chromosome analysis .....                                | 66 |
| SI 4-      | <i>f</i> -statistics .....                                 | 68 |
| SI 5-      | <i>qpGraph</i> analysis .....                              | 70 |
| SI 6-      | <i>qpAdm</i> analysis .....                                | 72 |
| References | .....                                                      | 91 |

1 **SI 1- Archaeological context of newly reported individuals**

2

3 **Dates**

4 In what follows, we give dates in one of two formats. If there is no direct radiocarbon  
5 date, we give a date based on archaeological context, in a format like “2500–1700  
6 BCE”. If there is a direct radiocarbon date, we give a date in a format like “95.4% CI  
7 calibrated radiocarbon age (Conventional Radiocarbon Age, Lab number),” using the  
8 prefix “cal” to indicate a date that is obtained from skeletal material for the same  
9 individual that yielded DNA (an example is “5983–5747 calBCE (6980±50 BP, Beta-  
10 226472)”). We calibrated all dates in OxCal 4.3<sup>1</sup> using the IntCal13 calibration curve<sup>2</sup>.

11 We note that in the course of generating 62 new radiocarbon dates for this study, we  
12 found that two individuals (RISE568 and RISE569) from Brandysek for which shotgun  
13 sequencing data was originally reported in Allentoft et al. 2015<sup>3</sup> and labelled as being  
14 from the Bell Beaker culture, were in fact misattributed. Our direct radiocarbon dating  
15 supports a much later date for RISE569: 660-770 calCE (1300±30 BP, Poz-84461).  
16 Thus, these individuals have not been included in our analysis.

17 **Galeria da Cisterna (Almonda karst system, Torres Novas, Portugal)**

18 *Contact person: João Zilhão*

19 Galeria da Cisterna is a fossil karst spring of the River Almonda, which now flows ~5 m  
20 below ground at the base of a ~75 m high cliff. The length of this narrow, meandering  
21 passage is approximately 100 m, and its cross-section is in general less than 2×2 m. The  
22 current entrance was exposed in the 1920s by a landslide, which allowed access and  
23 limited archaeological work carried out between the years 1937 and 1942<sup>4-6</sup>. Three loci  
24 were identified and focused on in subsequent excavations: AMD1, AMD2 and AMD3.

25 The AMD2 locus, excavated in the years 1988–89, featured a shallow Holocene deposit  
26 containing funerary contexts with grave goods spanning the interval between the Early  
27 Neolithic and the Iron Age. The lack of internal stratigraphic differentiation of this  
28 Holocene deposit is primarily due to the repeated prehistoric and early historic human  
29 habitation of the site, compounded by the activity of burrowing animals. A set of typical  
30 Bell Beaker V-perforated ivory buttons and a small fragment of a gold spiral suggested

31 that a Bell Beaker component ought to exist among the human bone remains. This was  
32 eventually corroborated by direct radiocarbon dating to this period of four right first  
33 pedal phalanges<sup>7,8</sup>. Two produced genome-wide DNA:

34 • I0839/AMD2-F23-90: 2457–2206 calBCE (3847±29 BP, OxA-28859)

35 • I0840/AMD2-G18-187: 2456–2201 calBCE (3836±29 BP, OxA-28857)

### 36 **Cova da Moura (Natural Cave, Torres Vedras, Portugal)**

37 *Contact person: Ana Maria Silva*

38 The natural cave of Cova da Moura (Torres Vedras, Portugal) was discovered in 1930,  
39 with excavations undertaken in 1932 and in 1961<sup>9–11</sup>. This cave was used as collective  
40 burial place between 3700 and 2200 BCE (Middle Neolithic to the Copper Age),  
41 according to the results of seven radiocarbon dates obtained on human bones<sup>12,13</sup>. The  
42 human remains were found commingled and fragmented. The study of the human  
43 remains performed by Ana Maria Silva<sup>12,14</sup> indicated a minimum number of 90  
44 individuals, both sexes, and 15 non-adults. In terms of material  
45 culture, Cova da Moura is by far the richest burial known in the region. Grave goods  
46 include limestone and bone idols, green stone pendants, gold artefacts, engraved slate  
47 plaques, bone, ivory, and variscite rabbit figurines, beads, and pre-Beaker and Beaker  
48 ceramics<sup>9–11,15</sup>. Further studies of this bone assemblage include isotopic analysis for  
49 dietary inferences<sup>16</sup> and mobility<sup>17</sup>, as well as nonmetric dental traits to assess  
50 populations affinities<sup>13</sup>. We generated genome-wide DNA data from one individual:

51 • I4229/CDM3: 2289–2135 calBCE (3775±25 BP, PSUAMS-1750)

### 52 **Paris Street (Cerdanyola del Vallès, Barcelona, Spain)**

53 *Contact person: Joan Francès Farré*

54 During urban construction work at Paris Street in Cerdanyola del Vallès (Vallès  
55 Occidental, Barcelona province) in 2003, a large amount of skeletal material and  
56 associated pottery was unearthed. Follow-up excavation uncovered a Chalcolithic  
57 hypogeum with more than 9,000 human remains as well as lithic and ceramic material,  
58 the latter assigned to the Bell Beaker tradition<sup>18</sup>.

59 The hypogeum displays several occupational phases. The oldest one presented an ash  
60 layer underlying the first inhumations that could have a ritualistic significance. Charcoal  
61 from that basal layer was dated to 2878-2496 calBCE (4110±60 BP, UBAR-817). The  
62 first funerary phase (UE-15) shows a large number of successive inhumations (minimal  
63 number of individuals 36) that are still in anatomical position, placed in lateral  
64 decubitus and with flexed knees. Seven arrow points were retrieved from this layer. A  
65 thin, upper layer (UE-5) probably represents a re-organization of the existing funerary  
66 space, prior to the second funerary phase (UE-2). At UE-5, two Bell Beaker vessels of  
67 maritime style were retrieved. The UE-2 layer comprises fewer inhumations, and all of  
68 them were accompanied by typical Bell Beaker vessels: three in Maritime style, and two  
69 in epi-Maritime style. There were also numerous additional pieces of diverse typology.  
70 Over this layer, a final one, labelled UE-3, contained two more skeletons arranged over  
71 riverbed pebbles with a Bell Beaker vessel of a regional style known as "Pyrenaic". A  
72 bone from this layer yielded the youngest date in the hypogeum of 2469-2206 calBCE  
73 (3870±45 BP, UBAR-860). We recovered ancient DNA data from 10 individuals:

- 74 • I0257/10362A: 2571–2350 calBCE (3965±29 BP, MAMS-25937)
- 75 • I0258/10367A: 2850–2250 BCE
- 76 • I0260/10370A: 2850–2250 BCE
- 77 • I0261/10378A: 2850–2250 BCE
- 78 • I0262/10381A: 2850–2250 BCE
- 79 • I0263/10385A: 2850–2250 BCE
- 80 • I0823/10360A: 2850–2250 BCE
- 81 • I0825/10394A: 2474–2300 calBCE (3915±29 BP, MAMS-25939)
- 82 • I0826/10400A: 2833–2480 calBCE (4051±28 BP, MAMS-25940)
- 83 • I1553/10388A: 2850–2250 BCE

84 **Arroyal I (Arroyal, Burgos, Spain)**

85 *Contact person: Manuel A. Rojo Guerra*

86 The site of Arroyal I was excavated by a research team from the University of Burgos in  
87 2011–2012. The site is a megalithic grave with well-preserved structural elements: a  
88 rectangular chamber (3x3.5 m), a long corridor (6 m), and a stone mound. The grave  
89 was used as a collective burial during 400 years in the Late Neolithic (3300–2900  
90 calBCE)<sup>19</sup>. The grave was then abandoned until the Chalcolithic when it was  
91 extensively remodelled: Neolithic layers were almost eliminated; the corridor was filled  
92 with rocks and sediment; the useful area inside the chamber was reduced when a stone  
93 wall was built; and a floor of limestone blocks was built inside the chamber. Several  
94 consecutive and isolated burials (9–10) were then introduced. The last one (Roy5) was a  
95 young individual buried with a set of 4 vessels (2 Bell Beakers and 2 carinated bowls)  
96 and surrounded by the long bones and skulls from previous burials. She represents the  
97 earliest observation of steppe-related genetic affinities in the Iberian Peninsula. Then  
98 the dolmen was closed using materials from the site (in secondary position) and, at the  
99 same time, the mound height was increased. Finally, an isolated pit grave (Roy4) was  
100 made inside the mound. We successfully analysed 5 individuals from this site:

- 101 • I0458/Roy1/SU25, Skull 1: 2458–2206 calBCE (3850±30 BP, UGA-15904)
- 102 • I0459/Roy2/UE25, Isolated human jaw: 2600–2200 BCE
- 103 • I0460/Roy3/SU25, Skull 2: 2461–2210 calBCE (3860±30 BP, UGA-15905)
- 104 • I0461/Roy4/SU19, Inhumation 1: 2348–2200 calBCE (3827±25 BP, MAMS-14857)
- 105 • I0462/Roy5/SU25, Inhumation 2: 2465–2211 calBCE (3870±30, UGA-15903);  
106 2566–2346 calBCE (3950±26 BP, MAMS-25936)

107 Samples Roy1 and Roy3 were genetically first-degree relatives and belonged to  
108 different mitochondrial haplogroups, which points to a father-son relationship.

109 **Camino de las Yeseras (San Fernando de Henares, Madrid, Spain)**

110 *Contact person: Corina Liesau, Patricia Ríos, Concepción Blasco, Pilar Prieto*

111 Most of our knowledge about this site has been gathered from four excavation  
112 campaigns, three of which have been rescue archaeology interventions by different

113 companies. This has conditioned the information available about the site. The site of  
114 Camino de las Yeseras is one of the greatest Chalcolithic ditched enclosures  
115 (approximately 22ha.) in central Iberia. It is essential to our understanding of the  
116 Chalcolithic period: the Pre Beaker burials and the impact that Bell Beaker customs and  
117 funerary rituals had on the consolidation of social inequalities among the first  
118 metallurgical societies of the Central Iberian Peninsula<sup>20,21</sup>.

119 Strategically located at the confluence of two important rivers, it was probably a central  
120 place located on a suitable and well-communicated landscape comprising two valleys  
121 for livestock and farming activities, and close to a rich resource catchment area where  
122 flint, salt, and clay are found. From the end of the fourth to the middle of the second  
123 millennia cal. BCE it was an important production and exchange centre of raw materials  
124 and objects. Since the second half of the third millennium cal. BCE, Bell Beaker burials  
125 are documented mainly on the south area of the site, and comprise different types of  
126 tombs, contemporaneous to other non-Bell Beaker ones, mainly collective burials with  
127 scarce grave goods.

128 Except for one collective Bell Beaker burial in a pit, three so-called *Funerary Areas*  
129 reveal the intentional delimitation of space and can be placed chronologically between  
130 the end of the third millennium and the first centuries of the second millennium cal  
131 BCE. Like pantheons, the huts with sunken floors at Camino de las Yeseras have two or  
132 more tombs excavated at the bases of their edges, as well as one deep hypogeum and  
133 one or several artificial caves. These pantheon-like structures were respected through  
134 time and reveal consecutive funerary and commensality activities within them.  
135 Although the sizes of the tombs are independent of the number of individuals buried  
136 within them, the hypogea include relevant prestige items such as ornaments in gold and  
137 ivory, and the covering of bodies with cinnabar. The artificial caves, on the other hand,  
138 include mainly Bell Beaker pottery of the Ciempozuelos incised style. The  
139 osteomorphological and size features noted on some of the Bell Beaker individuals  
140 suggest they had a peculiar appearance (e.g. gigantism, deformed head) when they were  
141 alive.

142 Sample I4245/RISE659 was obtained from a tomb with a double inhumation in a small  
143 artificial cave from *Funerary Area 2*. A 1–5-year-old child was inhumated at the far end  
144 of the cave and was covered by the body of a 20–30-year-old woman, carefully placed  
145 in supine position with the head to the left and flexed legs. The woman's head, which

146 rested on a pillow made with a grass fill, revealed an intentional cranial deformation  
147 from childhood. Both bodies are known to have decomposed within the infilled space.  
148 In terms of the grave goods, a small decorated cup was found on the child, whereas two  
149 bigger decorated inlaid cups had been placed between the breast and left arm of the  
150 woman. The child was radiocarbon dated to 1960–1740 calBCE (3525±40 BP, Ua-  
151 35021). No date is available for the woman, who was sampled for aDNA analysis, but  
152 the context suggests that both were interred at the same time:

- 153 • I4245/RISE695: 2280–1790 BCE

154 Sample I2247/RISE698 was obtained from a tomb with a collective inhumation in a  
155 small artificial cave from *Funerary Area 3*. At least four individuals have been  
156 identified, of which one is a mature female, two are adult mature men, and another adult  
157 is possibly also a male and the only complete skeleton documented in this tomb, while  
158 the others are secondary depositions, mainly skulls, mandibles and some long bones.  
159 The grave goods include a copper awl, one Bell Beaker, two incised cups, one  
160 undecorated vessel, one granite millstone and one sandstone mortar. The complete  
161 skeleton was radiocarbon dated to 2280–2030 calBCE (3650±40 BP, Beta 184837), but  
162 no radiocarbon date is available for the mature female sampled for aDNA analysis:

- 163 • I4247/RISE698: 2280–1790 BCE

#### 164 **Camino del Molino (Caravaca de la Cruz, Murcia, Spain)**

165 *Contact person: Joaquín Lomba Maurandi, Azucena Avilés Fernández, María Haber-*  
166 *Uriarte*

167 The site of Camino del Molino was excavated in 2008 by archaeologists based at the  
168 University of Murcia. It is a multiple burial site with an extraordinary number of  
169 individuals (n=1,363 at minimum), deposited in a circular pit (7 m in diameter and 1.6  
170 m deep), which was carved into the rock. The site is located 500 m away from a related  
171 settlement: Molinos de Papel. The majority of the human remains appear in irregular  
172 position, resulting from continuous post-depositional movements during the use of the  
173 site, relocating many of them to the center of the pit, and accumulations of skulls on the  
174 walls<sup>22</sup>. A total of 182 individuals were found in at least partial anatomical position,  
175 usually in crouched fetal position.

176 The anthropological examination of the skulls and the 182 complete skeletons indicates  
177 equal proportions of males and females (49.5% and 44.8%), of which 47.5% are young,  
178 33.6% mature, and 4.5% aged. Signs of interpersonal violence are observed in 20 skulls  
179 (57% male). Accompanying the human remains there were 20 copper elements (19  
180 punches, a fragment of a Palmela point and a dagger), 40 arrowheads and 60 flint knives  
181 (partially fragmented), 4 polished axes, retouched tabular flint (among them several  
182 daggers) and some punches and rods of bone, as well as partial remains of  
183 approximately 400 pottery vessels, 30 of which were intact. Of special interest is the  
184 presence of 50 skeletons of canis (6 lupus and the rest familiaris). The whole burial  
185 ensemble is assigned to a Middle and Final Copper Age horizon. The 20 available  
186 radiocarbon dates indicate sequential use of the tomb between 2920–2870/2800–2780  
187 and 2460–2190/2180–2140 calBCE (2 sigma). We successfully analyzed four  
188 individuals from this site, two of which have been radiocarbon dated. While the first  
189 individual corresponds to the time when Bell Beaker pottery was circulation in  
190 southeast Iberia, the other three belong the early-middle Copper Age:

- 191 • I0453/Cmol79: 2460–2140 calBCE (3830±40 BP, Beta-261524)
- 192 • I0455/Cmol123: 2900–2670 calBCE (4210±40 BP, Beta-261529)
- 193 • I0456/Cmol140: 2920–2340 BCE
- 194 • I0457/Cmol165b: 2920–2340 BCE

### 195 **Hégenheim (Haut-Rhin, France)**

196 *Contact person: David Billoin and Anthony Denaire*

197 The Hégenheim site is located at the left bank of the Rhine river, a few kilometers from  
198 the town of Basel. It was the focus of an emergency excavation during the summer of  
199 2004, when an individual Bell Beaker burial next to a Merovingian necropolis was  
200 uncovered<sup>23,24</sup>. The burial consists of an oval pit, north-south oriented, 1.80 meters long  
201 and 1.30 meters wide. The skeleton was positioned at the bottom of the pit, in lateral  
202 decubitus position on the right side, with flexed knees and elbows. The position  
203 indicates that the body is in its primary arrangement. There is suggestive evidence that  
204 the grave was covered by perishable material (plausibly a wooden structure).



205 The grave goods are limited to a decorated vessel, placed in a functional position, just  
206 behind the head. It is a large beaker of the S profile and flat-bottomed: 24 cm in height  
207 and 20 cm in maximum diameter. The external colour grades from reddish to brown; the  
208 vessel is polished and decorated both externally and internally. The latter decoration is  
209 restricted to the first two centimeters at the edge and consists of four parallel lines  
210 impressed with an S-twisted cord. The external decoration covers all of the beaker  
211 except for a short, one-and-a-half centimeter band below the edge. It consists of a series  
212 of ten strips alternated with oblique impressions with a comb, limited above and below  
213 by a line made with a cord. The decoration can be attributed to a mixed maritime style,  
214 considered to be an early stage of the Bell Beaker tradition.

215 The Hégenheim individual (13-Grave9, I1392) is an adult mature individual who is  
216 genetically female. The spatial orientation and the grave goods are consistent with a  
217 female Bell Beaker burial.

- 218 • I1392/13-Grave9: 2832–2476 calBCE (4047±29 BP, MAMS-25935)

#### 219 **Rouffach – Rue de Pfaffenheim (Haut-Rhin, France)**

220 *Contact person: Philippe Lefranc and Anthony Denaire*

221 The burial of Rouffach “Rue de Pfaffenheim”<sup>25</sup> was discovered in 2014 during  
222 prospecting and not subsequently pursued. It consists of a grave of a female over 30  
223 years of age, south-north oriented. She was deposited on her back with knees flexed  
224 right and hands turned to the face. The pit does not show any clear differentiation to the  
225 surrounding sediments. The funerary goods include a small vessel of sinuous profile  
226 with a handle, placed in a functional position behind the body, about 10 cm from the left  
227 shoulder. Seventeen V-perforated bone buttons, all placed around the right hemithorax,  
228 were also found. These kind of grave goods, especially the non-decorated vessel,  
229 suggest that this burial corresponds to a late, evolved Bell Beaker phase, and the  
230 radiocarbon date on the skeleton confirms this attribution:

- 231 • I1391/12-GraveExcavataion2014: 2346–2133 calBCE (3795±35 BP, Poz-68164)

232 **Sierentz - Les Villas d'Aurèle (Haut-Rhin, France)**

233 *Contact person: Luc Vergnaud*

234 Villas d'Aurèle site is located in the municipality of Sierentz, on the left bank of the  
235 Rhine, 14 km away from the town of Mulhouse. The site is located on the summit of the  
236 Rhine river upper terrace. It was the subject of an emergency excavation in 2010, when  
237 the remnants of numerous structures from the Neolithic to the early Iron Age were  
238 uncovered. Four Bell Beaker burials, comprising a small funerary area of 55 m of length  
239 in a northwest-to-southeast axis were excavated<sup>26,27</sup>.

240 Burial 68 (I1390): This well-preserved burial had a quadrangular shape with rounded  
241 corners, measuring 2.30 meters long by 1.80 meters wide. The walls were sub-vertical  
242 and the bottom was flat. Traces of lines of dark material and fragments of wood stakes,  
243 indicate that it originally contained wood, probably a structure around the body. The  
244 individual is an adult male, aged 30-59 years. He was lying on his left side, in a hyper-  
245 flexed position following a northwest-southwest axis (the head facing northwest). The  
246 body was accompanied with two decorated vessels, eight flint elements (three of them  
247 arrow points of concave base), a grooved sandstone, a stone wristguard, and a fragment  
248 of a wild boar tusk. The two vessels are beakers with an S-profile, of a beige colour and  
249 decorated with geometric, horizontal lines produced by a comb and with a cord. One  
250 vessel alternates bands of short horizontal and vertical lines with bands of incised  
251 diamonds while the other alternates oblique incised bands with herringbone patterns.  
252 The style of the pottery indicates a medium Bell Beaker phase, although the arrow  
253 points seem to suggest an Oriental tradition of the European Bell Beakers. There are  
254 two radiocarbon dates from this skeleton and we used the union for analyses:

- 255 • I1390/11-Grave68: 2566–2299 calBCE [2566–2524 calBCE (3910±35 BP, Poz-  
256 41227); 2489–2299 calBCE (3875±35 BP, Poz-41226)]

257 Burial 69 (I1389): This burial is well preserved, similar to burial 68. The shape of the  
258 grave is quadrangular with rounded corners, and measures 2.25 m long by 1.70 m wide.  
259 The remnants indicate a now-missing wooden structure around the body. The individual  
260 is a male with an age around 17-19 years. He was left lying at the center of the pit, in a  
261 flexed position over the left side of the body, along a northwest-to-southeast axis (the  
262 head facing northwest). Genetic data indicate that this individual is a first degree  
263 relative of individual I1390. They share both mitochondrial and Y-chromosome

264 haplogroups, which points to a sibling relationship (brothers). The funerary goods  
265 consist of two decorated vessels, thirteen flint elements (eight of them arrow points), a  
266 grooved sandstone, a fragment of marcasite and a pendant made of bone. The two  
267 beakers are very similar to those from burial 68, although the decorations are different.  
268 The style of the pottery also indicates a medium Bell Beaker phase. There are two  
269 radiocarbon dates from this skeleton and we used the union for analyses:

- 270 • I1389/10-Grave69: 2468–2278 calBCE [2481–2289 calBCE (3935±35 BP, Poz-  
271 41229); 2468–2278 calBCE (3925±30 BP, Poz-41228)]

## 272 **Mondelange - PAC de la Sente (Moselle, France)**

273 *Contact person: Arnaud Lefebvre and Michiel Gazenbeek*

274 This site is located in the Moselle valley, about 20 km north of the town of Metz. It was  
275 found during a rescue excavation in 2007 that uncovered 25 burials, nine of them dated  
276 to the later Bell Beaker tradition or to the transition to the Bronze Age<sup>28,29</sup>.

277 Burial 487 (I1381): The grave has a rectangular shape with rounded corners, measuring  
278 2 m long and 1.2 m wide, with a preserved depth of 40 cm and a west-east orientation.  
279 The individual is a 10-11-year-old juvenile that lies on his left side, facing west and  
280 showing upper and lower limbs hyper-flexed. There are numerous funerary elements  
281 within this grave, including Bell Beaker vessels at the eastern corner and a stone tool  
282 placed between the thorax and the right elbow.

283 Burial 515 (I1382): The grave has a rectangular shape, with a flat bottom and a west-  
284 east orientation. Three of the corners show semicircular digging that probably contained  
285 posts of 25 cm in diameter. The grave measures 2.4 m long and 1.3 m wide and is 0.8  
286 meters deep. The filling is made of brownish sandy silt containing small pebbles. The  
287 individual was an adult male lying on his left side, facing west. The upper limbs are  
288 flexed, with the right hand over the left humerus and the left hand placed in front of the  
289 face. The lower limbs are also flexed with the knees oriented to the north. Genetic data  
290 indicate that this individual is a second-degree relative of I1381. There are numerous  
291 funerary elements within this grave. A stone wristguard is placed next to the left  
292 shoulder. Two vessels are placed close to the feet, one near the axis of the body and the  
293 other one next to the south wall. One flint arrow point was found between both vessels,  
294 at 10 centimeters over the bottom of the pit. The two beakers, one decorated and the

295 other not - with a peculiar morphology - suggest an evolved, late Bell Beaker phase,  
296 with oriental influences. The radiocarbon date from this skeleton is:

- 297 • I1382/3-Grave515: 2435–2136 calBCE (3805±35 BP, GrA-4468)

298 **Marlens - Sur les Barmes (Haute-Savoie, France)**

299 *Contact person: Joël Serralongue and Pierre-Jérôme Rey*

300 The Marlens - Sur les Barmes site is located in the French Alps, southeast of lake  
301 Annecy. It arose from an accidental discovery instead of systematic archaeological  
302 prospecting. The site is a crevice that opens at the bottom of a rocky wall, near massive  
303 fallen rock debris; the skeleton has been placed inside<sup>30</sup>. The entrance is a very narrow  
304 gallery that has a height of only 60 cm. The interior space measures 2.50 m by 1.50 m  
305 with an irregular height that reaches 1.70 m at the highest point. The walls consist of  
306 large, fractured blocks. The original cavity was enlarged by removing some blocks. The  
307 skull was found in a small cavity formed by a natural layout of small stones.

308 The individual (I1388) is a young male of about 24 years of age. It was associated with  
309 a fragment of a Bell Beaker vessel. The decoration is made by a combination of  
310 horizontal bands and radial elements including ladder and lattice patterns. This type of  
311 incised-printed decoration points to regional Bell Beakers, specifically to the group  
312 from the Rhone-Provence of a recent phase. The radiocarbon date from this skeleton is:

- 313 • I1388/9-Grave1: 2456–2135 calBCE (3805±40 BP, Lyon-3099)

314 **La Fare (Forcalquier, France)**

315 *Contact person: Olivier Lemerancier*

316 The site of La Fare (Forcalquier, Alpes-de-Haute-Provence) is located in the south-east  
317 of France, in the Pre-Alps of the south about 80 km north of Marseilles. The site  
318 occupies the top of a vast promontory dominating the neighboring valleys. The site was  
319 excavated from 1991 to 1999 under the direction of André Müller, Olivier Lemerancier  
320 and Robin Furestier<sup>31</sup>.

321 Burial S14 is located on the margin of a small occupation of the regional Late Neolithic  
322 attributable to the Rhone-Ouvèze group. It presents itself as a vast oval pit 2.50m by  
323 2.30m, oriented southeast-northwest and extended in its southern part by a basin of

324 0.50m long by 0.70m wide, forming an access step to the main pit. The pit accessible by  
325 a step under a monolith was probably covered with a floor, blocks and a mound. The  
326 body is placed on the bottom of the pit in the west half. It is strictly oriented north-  
327 south, head to the north. It is positioned on the left side, the upper and lower limbs  
328 flexed.

329 The archaeological furniture consists of six objects. A copper dagger blade was placed  
330 beside the head behind the skull. A small object in the shape of a bone reel was found  
331 on the bottom of the pit in front of the head. In the southern part of the pit, under the  
332 "access step", were three ceramic beakers, two of which were inverted in front of a  
333 small bench in the substrate and a little higher up in the sediment infiltration mass. One  
334 is an early Bell Beaker with mixed decoration (comb and cord), the other two are  
335 characteristic beakers of the Rhone-Ouvèze group. Screening of the entire sediment of  
336 the structure yielded only one small segmented bone pearl.

337 The skeleton is that of a man aged between 30 and 40 years, of the so-called "alpine"  
338 cranial architectural type, about 1.72 m and wounded by inclusion in the olecranon of a  
339 fragment of Flint causing ankylosis of the left elbow.

340 The skeleton is preserved in the Musée de Préhistoire des Gorges du Verdon (Quinson,  
341 Alpes-de-Haute-Provence). The radiocarbon date for this individual is:

- 342 • I2575/Grave S. 14: 2476–2211 calBCE (3895±40 BP, GrA-22988)

### 343 **The dolmen of Villard (Lauzet-Ubaye, France)**

344 *Contact person: Aurore Schmitt*

345 The tomb excavated during 4 months from 1980 to 1983<sup>32</sup> is located at an altitude of  
346 1267 m near the Morgon relief. It is composed of a rectangular funerary chamber made  
347 of 6 slabs and a cover slab, an entrance corridor and a tumulus of around 12 m in  
348 diameter. A total 2575 human remains were discovered in the chamber. At least, 25  
349 individuals (16 adults and 9 juveniles) were buried successively in the grave. Partial  
350 articulated bodies represent only 5% of the remains, as most of the bones are  
351 disarticulated. A single sedimentary layer was observed but two levels of human  
352 remains organization were distinguished<sup>33</sup>. Grave goods are scarce compared to the  
353 number of individuals: two incomplete Bell Beakers vessels, a copper dagger, a wrist-  
354 guard, few lithic tools and ornaments. The first radiocarbon date provided by a human

355 remain from the base of the funerary layer is in accordance with the grave goods (Ly  
356 9995: 3895+/- 35)<sup>33</sup>. The second radiocarbon date, from the top of the layer (Ly 9994:  
357 3515+/-40)<sup>33</sup>, indicates that the tomb was, at least, reused during the middle Bronze age.

358 Two disarticulated cranium from the oldest funerary level were sampled:

- 359 • I3874/Vil-Lauz-1435: 2459–2242 BCE. Adult, genetically female.
- 360 • I3875/Vil-Lauz-1316: 2459–2242 BCE. Adolescent, genetically male.

### 361 **Clos de Roque (Saint Maximin-la-Sainte-Baume, France)**

362 *Contact person: Aurore Schmitt*

363 The preventive archaeological excavation in 2011 of the site of Clos de Roque at Saint-  
364 Maximin-la-Sainte-Baume revealed pre-and protohistoric human remains<sup>34</sup> over an area  
365 of 11200 m<sup>2</sup>. The early period of the Middle Neolithic (4950–4450 BCE) is documented  
366 by 9 features. Four of them contained human remains but no grave goods<sup>35</sup>. We  
367 successfully analysed three individuals from this site:

- 368 • I4303/ST2009: 4680–4460 calBCE (5710±40 BP, Beta-321567). The burial has a  
369 sub-circular shape. The pit measures 1.7 m with a preserved depth of 0.8m. The  
370 individual is a man deceased after 40 years old. He was lying on her left side in a flexed  
371 position following a south-north axis (head at the south). Genetic data shows that he  
372 was a second-degree relative of I4304/ST2224.

- 373 • I4304/ST2224: 4710–4540 calBCE (5780±30, Beta-321569). The feature, probably  
374 a domestic pit, has a circular shape. It measures 1.1m and is preserved on 0.60 m. The  
375 individual is a male juvenile deceased between 6.5 and 10 years old. The skeleton is  
376 completely disarticulated.

- 377 • I4305/ST2215: 4690–4460 calBCE (5720±40 BP, Beta-321568). This feature has a  
378 sub-circular shape, measuring 1,60 m long and 1,38 m wide. It is 0.25 m deep. This  
379 burial is installed in a domestic pit. The individual is a young female lying on her back,  
380 lower limbs flexed on her left side. The orientation follows a south-north axis (head at  
381 the south).

382 **Collet Redon (La Couronne-Martigues, France)**

383 *Contact person: Aurore Schmitt*

384 The site is located close to the Mediterranean Sea and was excavated in 2014 and 2015.  
385 The collective tomb, made of stones, has a sub-quadrangular shape. Two sepulchral  
386 levels were discovered with at least 11 individuals. Only one subject is partially  
387 articulated. Apart from human remains, 6 pearls made in limestone were found. A bone  
388 from the lower level produced a date of 3501–3112 calBCE (4585±35 BP, Poz-80330).  
389 We successfully analysed one individual from this site:

390 • I4308/CL14-172: 3501–3112 BCE. A petrous temporal from the lower level. It  
391 belongs to an adult female.

392 **Via Guidorossi (Parma, Italy)**

393 *Contact person: Maria Bernabò-Brea*

394 The site of Via Guidorossi at Parma, in the Po plain, was excavated in 2009 and  
395 corresponds to an advanced Bell Beaker period, dated to 2200–1930 years calBCE<sup>36</sup>.  
396 Tomb number 1 contained two skeletons, labelled individuals A (US-8) and B (US-9).  
397 Both were placed into an excavated structure of about 2.2 x 2.2 meters, with an opening  
398 at the northeast corner.

399 Individual A was a ~30-year-old woman placed in a south-north orientation, while  
400 individual B (I2478), the best preserved of both and the one successfully analysed in  
401 this study, was a 30-40-year-old male. This skeleton was placed with flexed legs on his  
402 left side, with his left arm also flexed and the right one extended. He was oriented  
403 north-south, with the head pointing north and the face looking to the east. Two Bell  
404 Beaker vessels, one decorated with incised triangles in a central band and the other  
405 undecorated, were placed at his feet, while two additional vessels were located close to  
406 the opening of the funerary structure. The decorated pottery is similar to objects found  
407 in other Bell Beaker Italian sites such as Rubiera (Reggio Emilia). Some lithic  
408 implements, including a remarkable knife, were found between the legs of individual B.  
409 The only similar lithic knife in a Bell Beaker context has been found at Fosso Conicchio  
410 near Viterbo. The radiocarbon date for individual B is:

411 • I2478/Tomb1, ind B: 2200–1930 calBCE (3671±40 BP, LTL-5035A)

412 A second tomb, excavated in a sub-quadrangular form, contained three more skeletons,  
413 labelled A (US-12), B (US-13) and C (U-14), all of them placed in flexed position.  
414 Individuals A and C were 60 and 50 year-old males, respectively, while individual B,  
415 who was lying between them and in inverted orientation (north-south), was a 15- to 18-  
416 year-old young female. Several decorated Bell Beaker vessels were located within this  
417 second grave. The bipolar orientation of the Guidorossi burials – south-north for  
418 females and north-south for males, all facing to the east – points to traditions found in  
419 central European Bell Beaker sites, such as those from lower Austria and Moravia.

#### 420 **Oostwoud-Tuithoorn (West Frisia, Netherlands)**

421 *Contact person: Harry Fokkens*

422 In 1956 and 1957, two burial mounds were excavated at Oostwoud-Tuithoorn, with  
423 additional research in 1963, 1966 and 1978<sup>37-39</sup>. Both burial mounds were located on a  
424 levee or crevasse splay of a large tidal creek system, about 40 km inland. The silt and  
425 clay sediments in which the skeletons were embedded provided an excellent context for  
426 bone preservation. After approximately 800 BCE the area was submerged until the  
427 building of dykes after 1000 CE. There is plenty of settlement evidence in the area from  
428 Late Vlaardingens/ Late Corded Ware groups, but few Bell Beaker associated remains.  
429 The Oostwoud-Tuithoorn burials are in that sense unique, even though they probably  
430 represent a much more extensive but difficult to detect settled landscape.

431 The sequence at this site starts with skeleton 575, dated between 2579–2284 calBCE  
432 (3945±55 BP, GrN-6650C). After a few decades, the site was likely converted into  
433 arable land. The next stage is the erection of Tumulus II, in which 11 individuals were  
434 buried between 2200 and 1900 calBCE: eight male individuals (skeletons 127, 228, 229,  
435 233, 235, 236, 239, 242) and three female individuals (skeletons 243, 247 and possibly  
436 232)<sup>38</sup>. Genetic data indicate that skeletons 228, 236 and 242 are second- or third-degree  
437 relatives. Several phases of mound extension have become visible through bundles of  
438 prehistoric plough marks that surround a circular or oval mound. The arable land  
439 underlying and around the burial mound contained many Bell Beaker and pot beakers  
440 sherds (Bell Beaker settlement ware). In essence, this dates all skeletons buried in  
441 mound II to older than approximately 1900 BCE. The male individuals were all buried  
442 on their left side, facing south. The three females were buried on the right side, facing



443 west or north. All individuals were laid down in a crouched position typical for Beaker  
444 burials. Apart from occasional flint artefacts no burial gifts were present.

445 In the Early Bronze Age, between 1900 and 1700 BCE probably, at 20 m distance, a  
446 second burial mound (Tumulus I) was raised in which two skeletons have been interred,  
447 probably in the already existing barrow (skeletons 230 and 231). Both skeletons were  
448 buried in a manner typical for the Middle Bronze Age, stretched on their backs. Both  
449 are dated between 1880 and 1650 calBCE (3440±40 BP, GrA-17225 and 3450±BP,  
450 GrA-17226). The burial mound was surrounded by a circle of 80 cm wide pits with a  
451 diameter of approximately 20 m. Probably at the same time a 35 m long alignment of  
452 almost identical pits was dug in connection with the older mound (Tumulus II). The  
453 stratigraphy of the arable land, the graves and the pit circles and alignments demonstrate  
454 that the Oostwoud-Tuithoorn burial mounds constituted a small persistent place, a burial  
455 ground that was used intermittently but consistently, probably by several generations of  
456 a local group of inhabitants. We successfully analysed nine individuals from this site:

- 457 • I4067/skeleton 127-M1: 1945–1692 calBCE (3500±50 BP, GrA-15602)
- 458 • I4068/skeleton 228-M3: 2300–1900 BCE
- 459 • I4069/skeleton 229-M4: 2188–1887 calBCE (3640±50 BP, GrA-6477)
- 460 • I4070/skeleton 230 barrow I-M7: 1881–1646 calBCE (3440±40 BP, GrA-17225)
- 461 • I4071/skeleton 231 barrow I-M10: 1883–1665 calBCE (3450±40 BP, GrA-17226)
- 462 • I4073/skeleton 236-M13: 2196–1903 calBCE (3660±50 BP, GrA-15598)
- 463 • I4074/skeleton 242-M14: 2278–1914 calBCE (3690±60 BP, GrA-15597)
- 464 • I4075/skeleton 243-M15: 2300–1900 BCE
- 465 • I4076/skeleton 247-M18: 2300–1900 BCE

466 The skeletons are stored in the provincial depot of the province of Noord-Holland at  
467 Castricum. We thank the staff of the depot and archaeologist R. van Eerden,  
468 archaeologist of the province of Noord-Holland, for the kind permission to sample the  
469 Oostwoud skeletons. Sampling (E. Altena) and first analysis of the skeletal remains (B.  
470 Veselka) was made possible by a grant from the Leiden University Fund/Bakels Fund.

471 **Unterer Talweg 58-62 (Augsburg, Germany)**

472 *Contact person: Philipp W. Stockhammer, Ken Massy*

473 The site of “Unterer Talweg 58-62” is situated in Haunstetten, a quarter of Augsburg to  
474 the very south of the city and approximately 1.6 km south of the cemetery of Hugo-  
475 Eckener-Straße, from which individuals are also included in this study. The cemetery  
476 was excavated in 2007 and consists only of two burials, a single burial (Feature 67) and  
477 a double burial (Feature 68) lying close to each other. Each was originally covered by a  
478 small tumulus with a surrounding ditch. Genetic data from two individuals from the  
479 double grave (Feature 68) were included. The double burial was placed in a rectangular  
480 shallow pit below a tumulus of diameter approximately 3.15 m. Skeleton 1 was a male  
481 individual, placed in contracted position on his left side with head pointing to the north  
482 adjacent to him. Skeleton 2 was placed in the opposite direction – following the sex-  
483 specific burial norms of the Beaker Complex in Southern Germany. The two individuals  
484 seem to have been interred at the same time, which also fits the radiocarbon dates:

- 485 • E09537\_d/Feature 68 Skeleton 2: 2464–2212 calBCE (3870±30 BP, MAMS-29075)
- 486 • E09538/Feature 68 Skeleton 1: 2471–2300 calBCE (3909±29 BP, MAMS-29074)

487 Close to the back of the male individual, a bowl was placed in the burial pit and a wrist-  
488 guard was placed on one of his lower arms. A decorated Bell Beaker was found close to  
489 the back of the female individual. Seen from a stylistic and relative chronological  
490 perspective, the beaker and the wrist-guard point to a rather early time within the  
491 Beaker Complex, which is also consistent with the radiocarbon dates.

492 **Unterer Talweg 85 (Augsburg, Germany)**

493 *Contact person: Philipp W. Stockhammer, Ken Massy*

494 The site of “Unterer Talweg 85” (due to a change of the street numbers after the  
495 excavation, the site is sometimes also known as “Unterer Talweg 49”) is situated in  
496 Haunstetten, a quarter of Augsburg to the very south of the city and only 300 m north of  
497 Unterer Talweg 58-62, from which individuals are also included in this study. The  
498 cemetery consists of two small groups of burials, group I with 5 graves and group II  
499 with 2 graves, both situated roughly 20 m apart from each other. Group I, the so-called  
500 northern group, was excavated in 2001. Three single burials were radiocarbon dated and

501 their 2 sigma ranges fall between 2465 and 2152 calBCE<sup>40</sup>. We obtained genetic data  
502 from the dentine of the individual in grave I/3 (feat. 1343). This was a male individual  
503 in contracted position with an arrowhead and several pieces of flint as grave goods.

504 • E09569/Grave I/3: 2397–2149 calBCE (3819±24, MAMS-18949)

#### 505 **Hugo-Eckener-Straße (Augsburg, Germany)**

506 *Contact person: Philipp W. Stockhammer, Ken Massy*

507 The site of “Hugo-Eckener-Straße” was excavated in 2010, when the city of Augsburg  
508 in Bavaria opened new land for construction. It is situated roughly 2.3 km north of the  
509 cemetery Unterer Talweg 58-62, from which individuals are also included in this study.  
510 The cemetery comprises 11 graves, nine of which are single and two of which are  
511 double burials, all clearly attributable to the Beaker Complex. This is a typical size for  
512 cemeteries of the Beaker Complex in southern Germany and can be understood as the  
513 burial place of a nearby hamlet. The individuals were all placed in contracted positions  
514 with the respective orientation of their head depending on their sex (males: contracted  
515 position on the left side of the body with the head in the north and a view to the east;  
516 females: contracted position on the right side of the body with the head in the south and  
517 a view to the east) and the graves were arranged in a north-northeast/south-southwest  
518 oriented row. Individuals of ten of the graves were radiocarbon dated with their 2 sigma  
519 ranges lying between 2562 and 2039 calBCE<sup>40</sup>. Genetic results from dentine of three  
520 individuals (graves 3, 8, 10) were included in this study:

521 Grave 3 (Feature 168) contained a female individual. In front of the lower leg of the  
522 woman, an undecorated Bell Beaker was placed together with a stone with worked  
523 surface (marks of polishing and picking).

524 Grave 8 (Feature 180) contained a double burial from which skeleton 1, a male  
525 individual with his head pointing to the NE. Parts of the lower body were missing and it  
526 was obviously buried together with a female individual (skeleton 2) as the female body  
527 was partly placed directly on the male one. There are no burial goods nor is there any  
528 evidence of later disturbances of the burials.

529 Grave 10 (Feature 190) contained a female individual in canonical position. A cup with  
530 a handle from its rim was situated in front of the upper leg/knee of the individual.

531 The radiocarbon dates for individuals from this site with genome-wide data are:

532 • E09568\_d/Grave 8 Skeleton 1: 2461–2210 calBCE (3860±25 BP, MAMS-18918)

533 • E09613\_d/Grave 3: 2289–2141 calBCE (3788±23 NP, MAMS-18913)

534 • E09614\_d/Grave 10: 2268–2046 calBCE (3748±19 BP, MAMS-18921)

535 **Bruck (City of Künzing, County of Deggendorf, Bavaria, Germany)**

536 *Contact person: Volker Heyd*

537 This site is a cemetery of 9 graves, excavated in 1990 in a rescue excavation by the  
538 county archaeologist of Deggendorf, Karl Schmotz. In an area of 40 x 20 m there were  
539 7 inhumations as well as one inurned cremation and another cremation with ashes  
540 shattered in the burial pit. A total of 8 out of the thus 9 graves are arranged in a single,  
541 approximately 28 m long, northwest-southeast oriented line (only grave 1 is off this  
542 line, approximately 20 m away to the west). Following bio-anthropological  
543 determinations as well as archaeological criteria, based on the gender differentiated  
544 burial custom of the Bell Beaker East Group and equipment rules, the graveyard yields  
545 burials of 4 men, 4 women and one child. Chronologically all graves belong to the  
546 middle phase A2 of the southern German Bell Beaker chronology<sup>41</sup>. Outstanding are  
547 grave 8, a senile man buried in the centre of a circular ditch, perhaps indicating a  
548 mound, and grave 9, a metal craftsman. We successfully analysed two individuals from  
549 this site:

550 • I3604/Obj. 278, grave 9: 2300 BCE. Left-sided crouched (slightly bent to the back)  
551 burial in a 0.9 x 1.5 m sized and approximately 0.75 m deep rectangular grave-pit.  
552 Inventory consists of 2 (1 larger and 1 smaller) metope-decorated Bell Beakers behind  
553 the back, wristguard, 4 flint arrow-heads, 2 flints and copper awl. These were piled  
554 together between feet and grave-pit, and probably originally deposited in a bag. The  
555 grave contains a metalworker's kit consisting of larger gravel-stone, arrow-shaft  
556 smoother, trapezoid-formed cobblestone, adze fragment with intentionally flattened  
557 edge, sandstone, 2 flint arrow-heads and at least 5 boar's tusks. Scientific analysis of the  
558 stones and adze showed that gold and copper were worked with them. Anthropological  
559 analysis indicates that this an adult man.

560 • I3607/Obj. 335, grave 7: 2300 BCE. Left-sided crouched burial in a 0,95 x 1,4 m  
561 sized rectangular grave-pit; inventory consists of decorated handled Bell Beaker behind  
562 the head and 2 flint arrow-heads.

563 **Alburg (Lerchenhaid-Spedition Häring, City of Straubing, Bavaria, Germany)**

564 *Contact person: Volker Heyd*

565 The site is a cemetery of 18 graves, excavated in 1982 in a rescue excavation by the  
566 State Heritage Office. The excavation completely dug out this graveyard of c. 10 x 30  
567 m. Almost all graves are laying in long rows, oriented north-south. Only grave 5 is off  
568 one of these rows, and it could not be established whether this really belongs to the  
569 cemetery. Individual grave pits are dug in the Löss soil underground with sizes of up to  
570 1,4 x 0,8 m, orientation always along the cardinal axis of north-south. All graves, except  
571 no. 10, contain single burials and follow the typical gender differentiated burial custom  
572 of the Bell Beaker East-Group<sup>42</sup> with men laying crouched on their left-hand side with  
573 heads in the north; and women on their right-hand side with heads in the south; all  
574 burials are thus facing east. Altogether there are 8 left- and 8 right-hand sided crouched  
575 burials, encompassing men, women, 3 adolescents and 5 children. All graves belong  
576 chronologically to the later, *Begleitkeramik (accompanying pottery)* -dominated phases  
577 A2b, B1 and B2 of the southern German Bell Beaker chronology<sup>43</sup>.

578 Only grave 9 – the earliest grave of the cemetery – yields a broad metope-decorated  
579 Bell Beaker and grave 18 a non-decorated handled Beaker, while all others are  
580 characterised by various forms of cups, jars, plates and bowls. The early graves 9 and  
581 16, and grave 8, are isotopically determined as outliers<sup>44</sup>. Additional equipment consists  
582 of bow-shaped bone/boar's tusk pendants; V-perforated bone/antler buttons; a bone pin;  
583 arrowheads; and other flints; deer teeth, as well as other animal bones as grave  
584 offerings. The cemetery stands out due to 6 graves, all belonging to women, yielding  
585 many V-formed perforated bone/antler buttons, amongst these 29 pieces in grave 6  
586 alone and 22 pieces in grave 15, here laid out "in a U-formed line from the clavicle to  
587 the lower departure of the sternum and then upwards again to the other clavicle", most  
588 of them with the perforated side facing upward. We successfully analysed thirteen  
589 individuals from this site:

- 590 • I3601/Grave 15: 2300–2150 BCE. Right-sided crouched burial; anthropologically  
591 adult woman.
- 592 • I3602/Grave 16: 2300–2150 BCE. Right-sided crouched burial; anthropologically  
593 adult woman.
- 594 • I3600/Grave 14: 2300–2150 BCE. Left-sided crouched burial; anthropologically a  
595 young adult; inventory includes four-footed plate/bowl.
- 596 • I3599/Grave 13: 2300–2150 BCE. Left-sided crouched burial; anthropologically  
597 adult man. Genetic data show that he is a first-degree relative of I3588/Grave 2, likely  
598 his brother.
- 599 • I3588/Grave 2: 2300–2150 BCE. Left-sided crouched burial; anthropologically  
600 adult man.
- 601 • I3589/Grave 3: 2300–2150 BCE. Left-sided, N-S oriented, crouched burial;  
602 inventory consists of bone pin, 5 decorated bow-shaped bone pendants, 2 fragmented  
603 boar’s tusks and 11 flints, all deposited behind the back; anthropologically adult man.
- 604 • I3590/Grave 4: 2300–2150 BCE. Right-sided crouched burial; anthropologically  
605 adult; inventory includes cup with an incised decoration. Genetic data show that she is a  
606 first-degree relative of I3593/Grave 6.
- 607 • I3594/Grave 9: 2300–2150 BCE. Half-way supine with flexed legs, half-way  
608 slightly right-hand side crouched burial, south-north oriented; inventory consists of  
609 broad metope-decorated beaker, 10 V-formed perforated bone buttons and 3 flints;  
610 anthropologically adult woman. Genetic data show that she is a first-degree relative of  
611 I3597/Grave 12.
- 612 • I3592/Grave 8: 2300–2150 BCE. Right-sided crouched burial; anthropologically  
613 adult woman.
- 614 • I3593/Grave 6: 2300–2150 BCE. Right-sided crouched burial; anthropologically  
615 adult woman.
- 616 • I3597/Grave 12: 2300–2150 BCE. Left-sided crouched burial; anthropologically an  
617 infant.

- 618 • I3587/Grave 1: 2300–2150 BCE. Left-sided crouched burial without skull (probably  
619 intentionally removed); anthropologically a child; inventory includes 6 deer teeth.
- 620 • I3596/Grave 11: 2300–2150 BCE. Left-sided crouched burial; anthropologically a  
621 child; inventory includes four-footed plate/bowl, decorated with incisions on the rim.

622 **Irlbach (County of Straubing-Bogen, Bavaria, Germany)**

623 *Contact person: Volker Heyd*

624 The site is a cemetery of 24 graves, excavated in 1987-89 in a rescue excavation by the  
625 county archaeologist of Straubing-Bogen, Karl Böhm. Most graves are badly damaged  
626 by ploughing, and likely several more were completely destroyed prior to the  
627 excavations. As a consequence, many single finds are not attributable to individual  
628 graves. The Irlbach cemetery might originally have yielded 30 graves, on an overall  
629 area of 60 x 30 m; this makes it the largest cemetery in Bavaria/southern Germany to  
630 date. Following the occupation plan, the cemetery consists of three grave groupings: A  
631 western part with 6, a central part with 14, and an eastern part with 3 graves plus one  
632 more isolated grave (no. 6). Particularly in the central part, many graves are arranged in  
633 north-south oriented rows. Individual grave pits are dug in the Löss soil underground,  
634 often quite shallow, with orientation always along the cardinal axis of north-south. Due  
635 to additional erosion all graves, except of nos. 10 and 22, are in various degrees  
636 damaged by ploughing. The majority of graves, except number 17 and potentially 12  
637 and 13 too, follow the typical gender differentiated burial custom of the Bell Beaker  
638 East-Group. Altogether there are 10 left and 10 right-hand sided crouched burials,  
639 encompassing men, women, 4 adolescents and 4 children. Particularly remarkable are  
640 the graves no. 2, representing a double inhumation of a woman and a child; no. 14 as it  
641 yields the only tanged copper dagger; no. 17 as this anthropologically securely  
642 determined woman should be lying on the right instead of the left-hand side; and  
643 numbers 20 and 22 as intentionally disturbed in antiquity, with grave 22 having seen the  
644 removal of a copper object.

645 Chronologically, all graves belong to the later, so-called *Begleitkeramik* (accompanying  
646 pottery) -phases A2b, B1 and B2 of the southern German Bell Beaker chronology<sup>45</sup>,  
647 with graves nos. 5 and 10 of the central group likely being the founding graves (phase  
648 A2b). There is however not a single decorated Bell Beaker in this cemetery. The four

649 graves of the eastern grave group are the latest interred, also representing the latest Bell  
650 Beaker stage (phase B2) in Bavaria. Two of them, numbers 6 and 11, and grave 16 of  
651 the western group, are isotopically determined as outliers<sup>44</sup>. The equipment is  
652 characterised by only one undecorated Beaker (grave 7), but various forms of many  
653 cups, plates and bowls. Additional equipment consists of bow-shaped bone/boar's tusk  
654 pendants from 4 graves; V-perforated bone/antler buttons from 3 graves; a flint from  
655 grave 9; non-local gravel-stones from 4 graves; as well as animal bones as grave  
656 offerings from 6 graves. We successfully analysed 3 individuals from this site:

657 • I4248/RISE916, grave 3: 2500–2000 BCE. Left-sided crouched burial;  
658 anthropologically adult man.

659 • I4249/RISE917, grave 4: 2500–2000 BCE. Right-sided crouched burial;  
660 anthropologically an infant.

661 • I4250/RISE918, grave 5: 2500–2000 BCE. Right-sided crouched burial;  
662 anthropologically infant

663 **Manching-Oberstimm (Gde. Manching, Kr. Pfaffenhofen a.d. Ilm, Bavaria,**  
664 **Germany)**

665 *Contact person: Karl-Göran Sjögren*

666 The site, also called Oberstimm Ost, is located on a terrace near the Danube in the  
667 region of Ingolstadt in upper Bavaria. It was discovered in 1982 when a roman military  
668 camp and a Hallstatt period settlement were excavated, which had been located by air  
669 photography<sup>46–48</sup>.

670 Four Bell Beaker graves were found, three of which formed a northwest-southeast line  
671 (graves 1-3). The graves were oriented along this line and consisted of rectangular pits,  
672 probably with internal wooden cist constructions. Graves 1 and 2 contained male burials  
673 while graves 3 and 4 contained females. The male burials were surrounded by circular  
674 ditches, ca 5-6 m in diameter.

675 Unusually, the male in grave 1 was buried in a 'female' position, that is, on his right  
676 side in contracted position and the head towards the south. The other burials followed  
677 common Bell Beaker conventions regarding sex differentiation. The two male burials  
678 were relatively richly furnished and contained archery equipment as well as copper



679 objects and pottery. Grave 1 had a wrist plate and a hafted copper awl, also considered  
680 as a female attribute, and a bone button. The grave also contained three pottery vessels,  
681 of which one was a metope-decorated beaker and one a bowl. Grave 2 had a copper  
682 dagger, a wrist plate and a bundle of arrowheads. Two vessels were also found, a  
683 metope-decorated beaker and a large bowl, approximately 50 cm in diameter. Grave 3  
684 had seven amber buttons with V-perforations and three vessels, of which two decorated  
685 beakers and a cup with handle.

686 The grave sampled here was grave 4 (RISE556). This grave was located a couple of  
687 meters to the west from the line formed by the other graves. It contained the skeleton of  
688 an adult woman, lying on her right side with the head to the south. In the grave were a  
689 series of amber and bone beads and buttons, some with V-drilled holes, and a beaker  
690 with metope decoration.

691 • I4123/RISE556/F0003/Grave 4: 2500–2000 BCE

692 No direct <sup>14</sup>C dating has been performed. Measurement of Sr<sup>87</sup>/Sr<sup>86</sup> isotope ratios  
693 were performed by Gisela Grupe and T. Douglas Price on tooth and bone samples from  
694 graves 1, 2 (males) and 4 (female). The results suggest that the two males may have  
695 been locals, while the female was non-local and had spent her early years in an area  
696 with more radiogenic bedrock<sup>49,50</sup>.

### 697 **Distillery Cave (Oban, Argyll and Bute, Scotland)**

698 *Contact person: Ian Armit*

699 Distillery Cave is located at around 12 m above present sea-level, at the foot of cliffs in  
700 the modern town of Oban<sup>51</sup> (Canmore ID 23064)<sup>52</sup>. It was discovered during building  
701 work in 1890 and later destroyed during the construction of a distillery complex in the  
702 early part of the twentieth century. The cave was relatively small, measuring some 3 m  
703 wide and 3 m high at its mouth, some 4 m deep, and lessening to around 1.3 m high at  
704 the rear. Concentrations of marine shell were recovered as well as objects of flint and  
705 bone, one of which has produced an Early Bronze Age radiocarbon date<sup>53</sup>. Human  
706 remains, representing at least 12 individuals, were recovered, ranging in age from  
707 infants to mature adults<sup>53</sup>. It is unclear whether they represent disturbed burials or the  
708 deposition of disarticulated human remains. There is no surviving contextual

709 information that might be used to associate the human remains with any of the material  
710 artefacts found in the cave. Three human petrous bones were successfully analyzed:

- 711 • I2660/GENSCOT29: 3514–3353 calBCE (4631±29 BP, SUERC-68703)
- 712 • I2691/GENSCOT30: 3701–3640 calBCE (4881±25 BP, SUERC-68704)
- 713 • I2659/GENSCOT28: 3762–3644 calBCE (4914±27 BP, SUERC-68702)

#### 714 **Macarthur Cave (Oban, Argyll and Bute, Scotland)**

715 *Contact person: Ian Armit*

716 Macarthur Cave is located at the foot of cliffs in the modern town of Oban, where it was  
717 discovered during quarrying operations in 1894 (Canmore ID 23066)<sup>52</sup>. Although the  
718 blasting associated with these works caused such damage that it is difficult to determine  
719 the original size or shape of the cave (which cannot now be traced and may have been  
720 entirely destroyed), it seems to have been a minimum of around 10 m deep by 6 m  
721 wide<sup>54</sup>. Human bone representing a minimum of four individuals was recovered, at least  
722 some of which appears to have been disarticulated<sup>51,53,54</sup>. Radiocarbon dating has shown  
723 that, although there are material artefacts of Mesolithic age within the cave, some of the  
724 human remains date to the Middle Iron Age<sup>53</sup>. Two human metacarpals were  
725 successfully analyzed for ancient DNA and proved to derive from the same adult male  
726 individual. One of these was dated, giving a surprisingly early, Neolithic date:

- 727 • I2657/GENSCOT26: 3952–3781 calBCE (5052±30 BP, SUERC-68701)

#### 728 **Dryburn Bridge (East Lothian, Scotland)**

729 *Contact person: Ian Armit*

730 Dryburn Bridge is an Iron Age enclosed settlement on the East Lothian coastal plain  
731 that also contains evidence for burials of an Early Bronze Age date<sup>55</sup> (Canmore  
732 ID 58802)<sup>52</sup>. These burials comprised two well-built stone cists, each containing two  
733 crouched individuals. Cist 1 contained the skeletal remains of a crouched inhumation  
734 (Burial 5), with the disarticulated remains of a second individual (Burial 4) lying over  
735 their pelvic region; both were adult males. Cist 2 contained a further crouched  
736 inhumation of an adult male (Burial 10) along with the disarticulated remains of a child

737 of around 6–8 (Burial 11). A Beaker vessel was found resting on the slabs above Cist 2.  
738 Two human bones were successfully analyzed for ancient DNA:

739 • I2567/GENSCOT14, Burial 5, Cist 1: 2275–1884 calBCE [2131–1884 calBCE  
740 (3615±40 BP, SUERC-4072); 2275–2024 calBCE (3725±35 BP, SUERC-4083)]

741 • I2568/GENSCOT15, Burial 10, Cist 2: 2287–2039 calBCE (3755±35 BP, SUERC-  
742 4078)

#### 743 **Eweford Cottages (East Lothian, Scotland)**

744 *Contact person: Ian Armit*

745 This is an Early Bronze Age cist grave that contained the contracted skeleton of an adult  
746 male, lying on his side and accompanied by a flint knife (Canmore ID 57670)<sup>52</sup>. A  
747 boulder adorned with prehistoric cup-marks was found nearby but may not be  
748 associated with the cist. The cist was a chance find and was excavated in 1975 by Helen  
749 Nisbet, but not published at that time. The individual was found to have suffered from  
750 rickets. The skeleton was radiocarbon dated to 2140–1916 calBCE (3650±40 BP,  
751 SUERC-5318) and this result was published in 2007<sup>56</sup> (there is a confusion in this  
752 publication where the location of the cist is mistakenly attributed, in the volume's  
753 appendix, to the nearby site of Eweford West). One molar from this individual was  
754 successfully analyzed for ancient DNA:

755 • I2569/GENSCOT17: 2140–1916 calBCE (3650±40 BP, SUERC-5318)

#### 756 **Longniddry, Evergreen House (East Lothian, Scotland)**

757 *Contact person: Ian Armit*

758 Several Bronze Age burials were exposed during landscaping work on Evergreen  
759 House, Longniddry, on the East Lothian coastal plain in 2000 (Canmore ID 182426)<sup>52</sup>.  
760 Rescue excavation revealed three crouched inhumations (Skeletons 2, 3 and 4), one of  
761 which (an elderly female, Skeleton 3) was contained in a stone cist, along with further  
762 disturbed, disarticulated bones<sup>57</sup>. The three complete burials were clustered tightly  
763 together, though in separate graves and on separate alignments. In total, at least five  
764 adults, both male and female, were represented. The remains are likely to have formed  
765 part of a larger Bronze Age burial ground and it is indeed possible, based on the

766 presence of concentrations of large stones, that the three excavated inhumations may  
767 have lain under a single (now almost vanished) cairn. Initial problems in the  
768 radiocarbon dating were resolved through redetermination by the dating laboratory<sup>58</sup>.  
769 Three adult human petrous bones were successfully analyzed for ancient DNA from  
770 each of the three most complete skeletons:

771 • I2573/Skeleton 4/GENSCOT21: 1501–1302 calBCE (3144±37 BP, OxA-16486)

772 • I2653/Skeleton 2/GENSCOT22: 1500–1300 BCE

773 • I2654/Skeleton 2/GENSCOT23: 1500–1300 BCE

#### 774 **Pabay Mor, Isle of Lewis (Western Isles, Scotland)**

775 *Contact person: Ian Armit*

776 A crouched burial of Middle Bronze Age date was excavated in 2002 in eroding sand  
777 dunes on the small island of Pabay Mor off the west coast of Lewis (Canmore  
778 ID 237343)<sup>52</sup>. The body of a mature adult male, damaged by erosion, was aligned north-  
779 south, lying on its right side with legs very tightly flexed<sup>59</sup>. Although there was no  
780 apparent cist, the burial was marked by a stone on its west side. The burial, although  
781 disturbed, was apparently associated with a small pottery vessel, a polished pebble and a  
782 piece of worked pumice. The disarticulated mandible of an infant was also recovered. A  
783 human molar from this individual was successfully analyzed for ancient DNA:

784 • I2655/GENSCOT24: 1442–1273 calBCE (3105±35 BP, SUERC-9172)

#### 785 **Stenchme, Lop Ness, Sanday (Orkney, Scotland)**

786 *Contact person: Ian Armit*

787 A crouched human burial was excavated in 2000 from eroding coastal sand dunes on  
788 the island of Sanday, Orkney (Canmore ID 306622)<sup>52</sup>. The Early Bronze Age burial lay  
789 in a stone cist measuring 1.3 m north-south by 0.9 m east-west, and was apparently  
790 associated with lithics and pottery ([https://canmore.org.uk/site/306622/sanday-  
791 stenchme](https://canmore.org.uk/site/306622/sanday-stenchme)). A human petrous bone was successfully analyzed for ancient DNA:

792 • I2981/GENSCOT80: 2009–1497 calBCE [1741–1497 calBCE (3320±50 BP, AA-  
793 51418); 2009–1696 calBCE (3520±40 BP, AA-43651)]

794 **Quoyness (Orkney, Scotland)**

795 *Contact person: Alison Sheridan*

796 This is a Neolithic, Maeshowe-type passage tomb (Canmore ID 3395)<sup>52</sup>, located on the  
797 eastern shore of the island of Sanday in the Orkney archipelago. It was first excavated  
798 in 1867 by local antiquary James Farrer, then in 1951–2 Vere Gordon Childe undertook  
799 limited excavation of the cairn and platform<sup>60,61</sup>. The monument consists of a central  
800 rectangular chamber and long narrow passage (orientated south-east) enclosed within a  
801 sub-circular cairn; the cairn is surrounded by a platform. The chamber has a tall,  
802 steeply-corbelled roof rising to a height of 4 m, and six cells project from it. The cairn  
803 consists of a pear-shaped core with a thick surrounding casing and a secondary outer  
804 casing. The surrounding platform, 41 m by 32 m, slopes up to the outer limit of the  
805 cairn. Finds comprise human and animal bones, pottery, a fine polished bone pin, two  
806 ground slate objects, several stone discs, two stone Skail knives, two rectangular slate  
807 objects, a cut tip of a deer antler, a rectangular piece of whalebone and a broken piece of  
808 pumice. The human remains were found in the outer section of the passage, in four of  
809 the cells, and in a pit set into the chamber floor, covered with a flagstone. Remains of  
810 12 to 15 skulls were found, and the other bones comprised the remains of at least 10  
811 adults of both sexes, two or three children over 10 years old, and probably two under 7  
812 years old. Two adult left petrous temporals (GENSCOT03 and GENSCOT04) were  
813 submitted for ancient DNA analysis, but only GENSCOT03, a male, produced results.  
814 The radiocarbon date for this individual is:

- 815 • I2631/GENSCOT03: 3098–2907 calBCE (4384±36 BP, SUERC-68633)<sup>62</sup>

816 There are four other radiocarbon dates for human remains from Quoyness. Two (2899–  
817 2626 calBCE (4190±50 BP, SRR-752) from a tibia and 3020–2679 calBCE (4265±50  
818 BP, SRR-753) from a femur) were obtained during the 1970s for Colin Renfrew<sup>60,63</sup>.  
819 One from a rib (3336–3096 calBCE (4487±18 BP, MAMS-14921/S-EVAA-24027))  
820 was obtained in 2012 for Michael Richards<sup>64</sup>. One from an adult tibia was obtained in  
821 2016 as part of PhD research based at the SUERC radiocarbon dating laboratory but its  
822 details have not yet been released.

823 **Point of Cott (Orkney, Scotland)**

824 *Contact person: Alison Sheridan*

825 This is a Neolithic chamber tomb comprising a stalled chamber set within a large  
826 horned cairn (Canmore ID 2756)<sup>52</sup>, located beside a cliff on the northeast coast of the  
827 island of Westray in the Orkney archipelago. It was excavated by John Barber and Eoin  
828 Halpin in 1984 and 1985 in response to the threat of destruction through coastal  
829 erosion<sup>60,65</sup>. The chamber is divided into four compartments or ‘stalls’ by jamb-stones,  
830 the rear compartment being divided into two cist-like structures. The chamber (around  
831 8.5 m long) is linked to the horned forecourt (16 m wide) by a short passage, and the  
832 cairn – over 31 m long – is roughly trapezoidal with concave long sides; the entrance is  
833 aligned south-south-east. Apart from human remains, finds comprise sherds of several  
834 round-based pots, 71 pieces of flaked flint, a piece of pumice (possibly deposited  
835 naturally), two pieces of worked stone and seven pebbles, and 16 beads (probably  
836 constituting a necklace) made from the teeth of killer whale, pilot whale and sperm  
837 whale. Over 600 fragments of disarticulated human bone were found, representing a  
838 minimum of 13 individuals. The partial remains of at least five adults, two subadults  
839 and five infants were found in the chamber and passage. The remains of two infants  
840 (one neonatal) were found inserted into the north end of the cairn. Six adult bone  
841 fragments (from ribs and radii from two adults) found in the upper levels of the collapse  
842 of the core-cairn surrounding the chamber may be disturbed from the chamber, rather  
843 than secondary deposits. Two individuals were successfully analyzed for ancient DNA:  
844 GENSCOT79, dentine from a lower molar tooth from a male of indeterminate age from  
845 compartment 3 and GENSCOT78, a petrous temporal from a juvenile female from  
846 compartment 1 (the outermost compartment):

847 • I2796/GENSCOT79: 3700–3380 calBCE (4856±33, SUERC-69074) (adjusted to  
848 allow for a slight marine offset: Brian Tripney, pers. comm.)

849 • I2980/GENSCOT78: 3361–3102 calBCE (4530±33 BP, SUERC-69073)<sup>62</sup>

850 There are nine other dates from human bone from Point of Cott, and nine dates for  
851 animal bone, mostly not from single-entity individuals<sup>65–68</sup>  
852 (<https://www.canmore.org.uk/c14index/2756>, accessed April 2017). Seren Griffiths has  
853 Bayesian-modelled the start of the dated human remains deposition at 3620–3390 cal  
854 BCE at 95% probability, and its end at 3010–2670 cal BCE at 95% probability. Another

855 similar exercise undertaken by Alex Bayliss et al.<sup>68</sup> has concluded that the primary  
856 period of human deposition in the monument was between 3800–3380 cal BCE and  
857 3010–2545 cal BCE, at 95% probability in each case. The newly-obtained date for  
858 individual I2980 fits within this range, while that for individual I2796 appears to be  
859 somewhat earlier.

## 860 **Isbister (Orkney, Scotland)**

861 *Contact person: Alison Sheridan*

862 This is a Neolithic chamber tomb that combines features of both stalled cairns and  
863 Maeshowe-type passage tombs, and is located close to cliffs at the southern end of  
864 South Ronaldsay in the Orkney archipelago (Canmore ID 9554)<sup>52</sup>. It was dug into by  
865 the local farmer, Ronald Simison, in 1958, 1976–79 and 1982, and limited excavation  
866 was undertaken by Roy Ritchie from the Inspectorate of Ancient Monuments in 1958.  
867 Additional, small-scale excavation was undertaken for Orkney Islands Council in 1987,  
868 and there was clearly some digging into the chamber prior to 1958<sup>60,69–74</sup>. The  
869 monument is popularly-known as ‘The Tomb of the Eagles’ (but see below on the date  
870 of the eagle remains). The chamber, 8.2 m long, is divided into five segments by four  
871 pairs of transversely-set orthostats, with the end compartments being wider than the rest  
872 of the chamber. There are also three side-cells. The passage leads from the mid-point of  
873 the chamber (and roughly at right-angles to it) to the outside of the roughly oval cairn,  
874 and is orientated ENE. The cairn is encased around its western half by a roughly D-  
875 shaped rubble mound edged by a semi-circular wall, and an earlier wall, termed a  
876 ‘hornwork’, extends NNE from the cairn. The numerous material finds, which include  
877 fragments of 45 round-based pots including several Unstan bowls, fragments of a flat-  
878 based pot, and several friable, shell-tempered sherds, are catalogued in ref. <sup>60,71</sup>. A wide  
879 variety of faunal remains were found, including those of white-tailed sea eagles which  
880 radiocarbon dating has shown to relate to secondary deposition during the second half  
881 of the third millennium, long after the monument was constructed<sup>75</sup>. Abundant human  
882 remains were found – over 15,000 fragments<sup>71</sup> – with some sealed below the floor slab  
883 of the south end compartment, some in the cells, many on the floor of the chamber,  
884 many filling the chamber, and many unstratified. A few bones were found outside the  
885 monument. Meticulous re-examination of these bones by David Lawrence<sup>73,74</sup>  
886 concluded that Chesterman’s initial MNI estimate of 341 was a gross over-estimation,

887 with the actual figure likely to be around 85. Ten bones were successfully analyzed for  
888 ancient DNA, and nine of these have been radiocarbon-dated (with the tenth failing due  
889 to insufficient collagen for dating); details of their sample numbers and radiocarbon  
890 dates are as follows:

- 891 • I2630/GENSCOT02: 2581–2464 calBCE (3999±32 BP, SUERC-68632)
- 892 • I2932/GENSCOT70: 2571–2348 calBCE (3962±29 BP, SUERC-68721)
- 893 • I2933/GENSCOT71: 3011–2886 calBCE (4309±29 BP, SUERC-68722)
- 894 • I2934/GENSCOT72: 3330–2910 calBCE (4466±33 BP, SUERC-69071). The  
895 calibrated result has been adjusted for minor marine offset; recalibration undertaken by  
896 Brian Tripney.
- 897 • I2935/GENSCOT73: 3336–3012 calBCE (4451±29 BP, SUERC-68723)
- 898 • I3085/GENSCOT74: 3339–3027 calBCE (4471±29 BP, SUERC-68724)
- 899 • I2977/GENSCOT75: 3009–2764 calBCE (4275±33 BP, SUERC-69072)
- 900 • I2979/GENSCOT77: 3334–2942 calBCE (4447±29 BP, SUERC-68726)
- 901 • I2629/GENSCOT01: 3180–2780 BCE
- 902 • I2978/GENSCOT76: 3336–3024 calBCE (4464±29 BP, SUERC-68725)

903 There are a further 28 radiocarbon dates (including six replicate determinations) for  
904 human bone from Isbister, plus four dates (including one replicate determination) for  
905 animal bone<sup>62,64,66,68,74–76</sup>. These are consistent with the dates obtained for the  
906 GENSCOT project and indicate an initial, main period of use during the late fourth  
907 millennium into the beginning of the third, followed by episodes of secondary funerary  
908 use during the first half of the third millennium, the third quarter of the third  
909 millennium, and (from a ‘cist’ in the ‘hornwork’) the mid-second millennium.  
910 Bayesian-modelling of the dates by Bayliss et al.<sup>68</sup> places the date range for the initial,  
911 main period of use at 3380–3105 cal BCE (start) to 3080–2835 cal BCE (end), both at  
912 95% probability. Note that the individual represented by individual I3085  
913 (GENSCOT74) had previously been radiocarbon-dated<sup>74</sup>: 4507±37 BP (OxA-25624);  
914 the result is not significantly different from the newly-obtained date.



915 **Holm of Papa Westray North (Orkney, Scotland)**

916 *Contact person: Alison Sheridan*

917 This is a Neolithic chamber tomb of stalled cairn type (Canmore ID 3243)<sup>52</sup>, located on  
918 the small island of Holm of Papa Westray, in the Orkney archipelago. The stalled  
919 chamber has four compartments plus a cell opening off its inner end; the monument is  
920 orientated north-west<sup>60,77,78</sup>. The cairn is rectangular and measures around 11.8 by 6.3  
921 m; the chamber is linked to one end of the cairn by a short passage. It was excavated by  
922 George Petrie in 1854, and more thoroughly by Anna Ritchie in 1982–3. Finds include  
923 round-based pottery from inside the monument, plus Grooved Ware and coarse Beaker  
924 from secondary activity outside the cairn; tools of flint, chert and quartz; a stone  
925 pounder, stone pot lids and stone Skail knives; a bone bead, points and a whalebone  
926 object; and pumice. Animal remains of various species were found, including those of  
927 sheep that had eaten seaweed as part of their diet<sup>79</sup>. Human remains were found inside  
928 the chamber, with a few in the entrance passage and the forecourt; an MNI of 9–10 was  
929 estimated, comprising both sexes and adults and children. Four individuals were  
930 successfully analyzed for ancient DNA; details of their sample numbers and  
931 radiocarbon dates are as follows:

- 932 • I2650/GENSCOT10: 3500–3360 calBCE (4754±36 BP, SUERC-68642)\*
- 933 • I2636/GENSCOT08: 3520–3362 calBCE (4651±33 BP, SUERC-68640)
- 934 • I2651/GENSCOT11: 3330–3090 calBCE (4525±36 BP, SUERC-68643)\*
- 935 • I2637/GENSCOT09: 3510–3340 calBCE (4697±33 BP, SUERC-68641)\*

936 \* indicates that the calibrated result has been adjusted for minor marine offset;  
937 recalibration undertaken by Rick Schulting.

938 Sixteen additional radiocarbon dates exist for Holm of Papa Westray North, of which  
939 five are from human remains, two are from Orkney vole and nine are from other  
940 animals<sup>58,66–68,80–83</sup>. The dates indicate funerary use within the second half (mainly the  
941 third quarter) of the fourth millennium; Bayliss et al.<sup>68</sup> have Bayesian-modelled the start  
942 of human deposition at 3685–3375 cal BC, and its end at 3370–2795 cal BC, at 95%  
943 probability. The new dates fit well within this time range.

944 **Tulloch of Assery A (Highland (Caithness), Scotland)**

945 *Contact person: Alison Sheridan*

946 This is a Neolithic chamber tomb, located at the northern end of Loch Calder, near  
947 Thurso in the former county of Caithness (Canmore ID 7934)<sup>52</sup>. It comprises two  
948 Orkney-Cromarty-Hebrides-style passage tomb chambers set within a short-horned  
949 cairn, the passage of the southern chamber facing south and that of the northern  
950 chamber facing north. The northern chamber has two ‘platforms’ or bench-like features.  
951 Along with the nearby chamber tombs of Tulloch of Assery B and Tulach an  
952 t’Sionnaich, it was excavated by John Corcoran in 1961, in advance of work to convert  
953 Loch Calder into a reservoir, thereby partly submerging the monument (The southern  
954 chamber had been almost completely emptied at some point prior to 1961<sup>84,85</sup>). The  
955 artefactual finds include an oblique arrowhead of grey flint, three flint flakes, two flint  
956 blades and two flint chips, of which one is probably natural rather than knapped. A  
957 fragment of rock crystal was also found, along with 19<sup>th</sup> and 20<sup>th</sup> century artefacts. The  
958 remains of between nine and 11 people (of both sexes and including adolescents as well  
959 as adults) were found in six discrete deposits within the northern chamber. One sample  
960 of human bone – a petrous temporal from an adult male – was successfully analyzed for  
961 ancient DNA:

- 962 • I2635/GENSCOT07: 3653–3390 calBCE (4796±37 BP, SUERC-68639)<sup>62</sup>

963 Two other radiocarbon dates had previously been obtained from human remains from  
964 this monument<sup>85,86</sup>: bone from the south-west ‘bench’ in the northern chamber was  
965 dated to 3702–3378 calBCE (4800±60 BP, GU-1338) – an almost identical result to the  
966 new date – while bone from the tightly-contracted, articulated skeleton of an adult,  
967 probably male, found near the centre of the chamber, produced a date of 1437–1127  
968 calBCE (3055±60 BP; GU-1329), confirming it to be a Middle Bronze Age secondary  
969 deposit. The early to mid-fourth millennium dates provide important evidence for the  
970 date of short-horned cairns.

971 **Tulloch of Assery B (Highland (Caithness), Scotland)**

972 *Contact person: Alison Sheridan*

973 This is a Neolithic chamber tomb, located at the northern end of Loch Calder, near  
974 Thurso in the former county of Caithness, located just 30 m SW of Tulloch of Assery A  
975 (Canmore ID 7907)<sup>52</sup>. It comprises a three-compartment stalled chamber with a long,  
976 curving entrance passage set asymmetrically within a circular cairn 29 m in diameter.  
977 Like its neighbours Tulloch of Assery A and Tulach an t'Sionnaich, it was excavated by  
978 John Corcoran in 1961, in advance of work to convert Loch Calder into a reservoir<sup>84,85</sup>.  
979 Finds include the remains of 13 vessels of Early Neolithic modified Carinated Bowl  
980 pottery, from a layer of burnt material clearly predating the construction of the chamber,  
981 plus two flint points, possibly arrowheads; a base of a leaf-shaped flint arrowhead; the  
982 tip of a chert arrowhead (found embedded within a human vertebra); a flint scraper and  
983 various flakes, fragments, cores and split pebbles of flint; three fragments of rock  
984 crystal and two rounded quartz pebbles; and a bone 'scoop'. Some of the lithic finds  
985 were discovered in the burnt layer below the paving of the chamber (together with small  
986 fragments of unidentifiable burnt bone). A few animal bones of various species were  
987 found in the chamber and passage (with a small number found below the paving).  
988 Human remains from a minimum of five individuals were found, mostly heaped up on a  
989 layer of slabs in the centre of the innermost compartment of the chamber. The  
990 individuals comprise two adults. One of these was aged around 48 to 54 and was the  
991 person who was probably killed by the arrow that landed in the lower back. There was  
992 also a smaller individual aged around 36 to 38. There was also a child (represented by a  
993 phalange from a foot) from the central compartment; a young adult (represented by a  
994 molar tooth) from the outer compartment; and a foetus or neonate (represented by half a  
995 mandible) from the passage. One sample of bone from the oldest adult (who appears to  
996 be the person who had been killed by the arrow), a petrous temporal, was successfully  
997 analyzed for ancient DNA and was found to be female:

- 998 • I2633/GENSCOT05: 3766–3642 calBCE (4911±32 BP, SUERC-68634)

999 Six other dates had previously been obtained for this monument, five from animal bone  
1000 and one from charcoal, and including three from beneath the paving of the chamber  
1001 floor<sup>85,86</sup>. All of those dated samples are of unidentified species, and are unlikely to  
1002 have been single-entity samples. Thus, the results should be treated with caution. While

1003 the latest date, from animal bone from the chamber filling, suggests secondary activity  
1004 during the second half of the third millennium, 2458–2042 calBCE (3795±60 BP, GU-  
1005 1337), the others suggest that there may have been some mixing of material in antiquity  
1006 between that from the burnt layer beneath the chamber floor paving and that on the  
1007 chamber floor. Charcoal from the burnt layer produced a date of 3772–3383 calBCE  
1008 (4840±65 BP, GU-1339); animal bone from below the paving produced dates of 3635–  
1009 3139 calBCE (4655±60 BP, GU-1336; adjustment is required for a possible slight  
1010 marine offset) and 3096–2145 calBCE (4095±165 BP, GU-1335). Animal bone from  
1011 the chamber floor produced dates of 3942–3644 calBCE (4965±60 BP, GU-1332) and  
1012 3637–3342 calBCE (4670±65 BP, GU-1333).

### 1013 **Tulach an t’Sionnaich (Highland (Caithness), Scotland)**

1014 *Contact person: Alison Sheridan*

1015 This is a Neolithic passage tomb (Canmore ID 7901)<sup>52</sup>, orientated SSW, whose  
1016 associated cairn has a complex, multi-period history of construction that ended in it  
1017 becoming a long cairn with a heel-shaped cairn at its southern, higher end<sup>84,85</sup>. The  
1018 monument lies 215 m and 270 m respectively east of the two Tullochs of Assery, at the  
1019 north end of Loch Calder, and it was excavated by Corcoran in 1961 and 1963 as part of  
1020 the same fieldwork initiative. The small, squarish chamber and passage had initially  
1021 been encased within a small round cairn, but this was subsequently enlarged and  
1022 converted to a heel-shaped cairn with a straight façade and (probably) short projecting  
1023 horns. The façade blocks the passage entrance. In a third phase of construction, the heel-  
1024 shaped cairn was enlarged and a long, rectangular ‘tail’ was added, converting the  
1025 monument into a long cairn some 58 m long (it would be worth revisiting this part of  
1026 the constructional sequence to double-check whether the long tail was indeed added at  
1027 this stage, or whether it had been an earlier addition). Finds were few, comprising  
1028 sherds from two Early Neolithic pots, sherds from a Beaker, sherds from a Bronze Age  
1029 pot used as a cinerary urn and part of a medieval or later pot; a dozen flint chips and  
1030 flakes (including one possibly used as a scraper), several scorched; and a pitchstone  
1031 flake. Bones from various animals were found in the chamber and in the upper levels of  
1032 the cairn, and remains of terrestrial and marine mollusca were found among the material  
1033 that had been deliberately deposited to fill the chamber. Remains of six human  
1034 individuals were found, including the cremated bones of one (possibly female, possibly

1035 adult) from the secondary, Bronze Age deposit in front of the heel-shaped cairn<sup>75</sup>. The  
1036 others were all from the lowest layer in the chamber, and comprised the remains of an  
1037 adult, probably male, in his early thirties; a young adult, probably female; a relatively  
1038 old individual (represented by a mandible fragment); fragments of a possible fourth  
1039 individual; and two fragments possibly from an infant. A petrous temporal from an  
1040 adult male (presumably the individual in his early thirties) yielded ancient DNA:

1041 • I2634/GENSCOT06: 3704–3535 calBCE (4851±34 BP, SUERC-68638)

1042 Three radiocarbon dates – one from human bone, two from animal bone (unidentified  
1043 species) – were obtained by Niall Sharples in the mid-1980s<sup>86</sup>: human bone from the  
1044 chamber floor was dated to 3634–3361 calBCE (4685±60 BP, GU-1334), while animal  
1045 bone from the filling of the chamber duly post-dated this: 2917–2620 calBCE (4210±60  
1046 BP, GU-1330) and 2872–2465 calBCE (4055±70 BP, GU-1331). In addition, the  
1047 cremated remains from the Bronze Age pot were dated in 2005: 2201–1980 calBCE  
1048 (3705±35 BP, GrA-28611)<sup>75</sup>. These confirmed the suspected Early Bronze Age date of  
1049 this secondary deposit.

## 1050 **Clachaig (North Ayrshire, Scotland)**

1051 *Contact person: Alison Sheridan*

1052 This is a chamber tomb of Clyde type (Canmore ID 39676)<sup>52</sup>, located on the south coast  
1053 of the Isle of Arran<sup>87,88</sup>. The chamber is divided into two segments by sill-stones and  
1054 overlapping side-slabs, and there may originally have been more: the insertion of a cist  
1055 during the Early Bronze Age may have destroyed further chamber segments. The  
1056 associated cairn is roughly oval, but there may originally have been a concave forecourt  
1057 façade, now obscured by cairn slip (or deliberate infill). The monument was excavated  
1058 by Thomas Bryce in 1900. Finds comprised a complete Early Neolithic decorated  
1059 bipartite bowl, a large part of an Early Neolithic lugged jar, and a stone axehead from  
1060 the chamber's compartments, with sherds of an Early Bronze Age Food Vessel and a  
1061 flint knife from the cist. Bones from ox and pig, many from young animals, and  
1062 possibly lamb bones were found in the chamber and a young pig's upper jawbone was  
1063 found in the cist. The human remains consisted of the remains of 14 individuals, of both  
1064 sexes and including adults and children, in the chamber and fragmentary remains of a

1065 further individual in the cist. A petrous temporal belonging to adult female skull 'B'  
1066 from the chamber was successfully analyzed for ancient DNA:

- 1067 • I2988/GENSCOT60: 3517–3362 calBCE (4645±29 BP, SUERC-68711)

1068 This individual had already been radiocarbon-dated in 2004, along with three others  
1069 from the chamber (namely Bryce's 'A', 'C' and 'D'<sup>89</sup>). The previous date for 'B' differs  
1070 little from the new date: 3627–3363 calBCE (4670±40 BP, GrA-25617). The date for  
1071 individual 'A' is 3658–3384 calBCE (4800±40 BP, GrA-25616); that for individual 'C'  
1072 is 2570–2310 calBCE (3949±36 BP, UB-6897) – clearly a secondary deposit – and that  
1073 for individual 'D' is 3632–3373 calBCE (4708±37 BP, UB-6898).

#### 1074 **Raschoille Cave (Oban, Scotland)**

1075 *Contact person: Clive Bonsall*

1076 Raschoille Cave is a small cave on the west coast of Scotland, near the town of Oban.  
1077 The cave, eroded in Precambrian slates and phyllites, lies about 13 meters above sea  
1078 level and close to the altitudinal limit of the Holocene marine transgression. During the  
1079 Neolithic, when relative sea level was still several meters higher than today, the cave  
1080 occupied a position at the edge of a sheltered marine embayment. The cave entrance  
1081 was exposed in 1984 when talus deposits were cleared during construction work. A  
1082 rescue excavation was undertaken by members of the local archaeological society.

1083 The uppermost deposits within the cave consist mainly of loose angular slate debris  
1084 derived from mechanical breakdown of the roof and walls of the cave. Within these  
1085 stony deposits the excavators recognized several stratigraphic units ('layers I–VII'),  
1086 based on variations in the size and alignment of the rock fragments, the amount of  
1087 interstitial soil material, the degree of compaction of the material, and the  
1088 presence/absence of calcareous coatings or deposits within the material. It is debatable,  
1089 however, whether these 'layers' have any real chronological value.

1090 Archaeological remains were found mainly in layers II–V, with the greatest  
1091 concentration of material in layers III–IV. They comprised disarticulated human bones  
1092 and small numbers of animal bones, fish bones, marine shells, and carbonized plant  
1093 remains. Since no articulated groups of human bones were recovered, most likely their  
1094 presence in the cave was the result of secondary burial of excarnated remains.

1095 Part of the human bone assemblage from Raschoille Cave was examined by Kathleen  
1096 McSweeney and Laura Bonsall at Edinburgh University. This sub-assemblage  
1097 comprised a total of 1046 bone fragments and teeth, from at least 10 individuals,  
1098 including both adults and children. AMS <sup>14</sup>C measurements on postcranial bones from  
1099 different individuals were obtained from the Oxford Radiocarbon Accelerator Unit, and  
1100 range from 4980±50 to 4535±50 BP / *c.* 3800–3200 calBCE<sup>90</sup>, which date the burial  
1101 activity in Raschoille Cave to the earlier part of the Neolithic in western Scotland.

1102 The petrous temporal bones from six individuals (from layers III and IV) were selected  
1103 for ancient DNA analysis:

- 1104 • I3133/ORC\_III\_10.4: 3800–3200 BCE
- 1105 • I3134/ORC\_III\_17.21: 3800–3200 BCE
- 1106 • I3135/ORC\_III\_19.1: 3800–3200 BCE
- 1107 • I3137/ORC\_IV\_17.19: 3800–3200 BCE
- 1108 • I3136/ORC\_III\_21.3: 3800–3200 BCE
- 1109 • I3138/ORC\_IVa\_87.6: 3800–3200 BCE

#### 1110 **Great Orme Mines (Llandudno, Wales)**

1111 *Contact person: Nick Jowett*

1112 Situated on a limestone outcrop rising to the west of the Victorian seaside town of  
1113 Llandudno in North Wales, the Great Orme bronze age copper mines were discovered  
1114 in 1987 during a reclamation scheme of a derelict 19<sup>th</sup> century mine site. Over 5 miles  
1115 of tunnels have been discovered dating between 1860–900 BCE. During excavation on  
1116 surface at the mine site in 1991, an almost complete human mandible was discovered in  
1117 a mixed context, probably an ancient burial disturbed by 19<sup>th</sup> century miners. The  
1118 radiocarbon date, 1693–1600 calBCE, makes the mandible contemporary with the main  
1119 phase of mining activity on the Great Orme. One tooth from this mandible yielded  
1120 ancient DNA:

- 1121 • I1775/GOM245: 1693–1600 calBCE (3344±27 BP, OxA-14308)

1122 **North Face Cave (Llandudno, Wales)**

1123 *Contact person: Nick Jowett*

1124 Situated on a limestone outcrop rising to the east of the Victorian seaside town of  
1125 Llandudno in North Wales, the Little Orme's North Face Cave was excavated between  
1126 1962 and 1976 by John Blore. The partial remains of four human skeletons from  
1127 individuals between 4–18 years old were recovered along with a single amber bead. In  
1128 2015, a section of human maxilla was found within material disturbed by potholers at  
1129 the end of the cave. The maxilla was a close match to one of the previously discovered  
1130 mandibles. A section from the maxilla was dated to 1415–1228 calBCE. One tooth from  
1131 this mandible was consider for genetic analysis:

- 1132 • I2574/NFC07151: 1415–1228 calBCE (3065±36 BP, SUERC-62072)

1133 **Hasting Hill (Sunderland, Tyne and Wear, England)**

1134 *Contact person: Chris Fowler*

1135 The round barrow at Hasting Hill sits on the summit of a limestone hill overlooking the  
1136 remains of an Early Neolithic causewayed enclosure and a cursus monument. The  
1137 approximately 12 m diameter barrow was excavated in 1912 by C.T. Trechmann<sup>91,92</sup>  
1138 who located nine different burial features including four short cists, two square cists, a  
1139 grave, a stone lined pit, and two 'unurned' deposits of cremated bone. The different  
1140 burial modes, grave goods, and radiocarbon dates from two of these burials, along with  
1141 different depths of the burials depicted in Trechmann's illustration, suggest periodic  
1142 burial at the barrow over several centuries<sup>93</sup>. Five of the burials were accompanied by  
1143 Food Vessels. All that currently remains of the burials are two displays in Sunderland  
1144 Museum, in which the cists (described by Trechmann<sup>92</sup> as 'secured entire') have been  
1145 reconstructed and the human remains are stored. The cists are Trechmann's finds 9 and  
1146 12, and the flexed burials in each matches the description of those from the excavation.

1147 Find 12 was a short cist oriented northwest-southeast and located at the northeast  
1148 periphery of the barrow. The skeleton of an infant was lying on its right side on the  
1149 bedrock at the base of the cist, with its head to the southeast and a Food Vessel placed  
1150 behind its head. A flint knife and an 'ox tooth' were also recovered, although their  
1151 location with respect to the skeleton is not recorded. Recent osteological analysis



1152 identified the infant as about one year old at death, genetically male. An ulna from this  
1153 individual was radiocarbon dated:

1154 • I2421/TWCMS Sk2008-3075, find 12: 1931–1756 calBCE (3524±28 BP, OxA-  
1155 26256)<sup>94</sup>

1156 Find 9 was a short cist oriented east-west<sup>92</sup>. The excavator focused his description on a  
1157 flexed skeleton of an adult male, lying on his right on the limestone bedrock with his  
1158 head to the west and his arms raised so his hands covered his face (two other burials at  
1159 the site had arms and hands positioned in this way, which is only recorded in one other  
1160 case in Northeast England). A flint knife was placed in front of the forearm, a vessel in  
1161 front of the face, and a bone pin or point behind the shoulders. The cist also contained 5  
1162 periwinkle shells, fish, bird and animal bones (see below) and an antler tine pick. The  
1163 vessel is unusual, with a high-bellied s-profile Beaker shape, but is coarse and decorated  
1164 with diagonal stab marks. Analysis of a metacarpal from this adult male did not yield  
1165 ancient DNA. A left rib yielded a radiocarbon date of 2194–1977 calBCE<sup>93</sup>. However,  
1166 recent osteological analysis suggests a more complex use of the ‘Find 9’ cist,  
1167 identifying eight weathered (bleached and cracked) bones from a child approximately 5  
1168 years old at death, and the cremated remains of an adult<sup>94</sup>. Further examination during  
1169 aDNA sample selection located two unburnt adult teeth not from the flexed burial.  
1170 Trechmann’s report mentions that that this cist contained what he thought were ‘some  
1171 bird bones and a few calcined mammalian (non-human) bones...’<sup>92</sup>, but the human  
1172 remains identified recently are not mentioned. Although it cannot be excluded that  
1173 remains from other burials were intermixed with the cists put on display in the museum,  
1174 it seems likely that the newly-identified remains were not recognised as human by the  
1175 excavator. Taking this as the simplest explanation, the radiocarbon date of 2465-2209  
1176 calBCE from the tooth (sample I2612) suggests earlier use of this cist; it is possible the  
1177 flexed burial was placed into an already-old burial feature. Since the radiocarbon date  
1178 places this individual within the Beaker period, we used the label BB\_Britain for  
1179 analysis. The aDNA identifies the tooth as from a woman:

1180 • I2612/TWCMS Sk2008-1953, find 9: 2465–2209 calBCE (3865±35 BP, Poz-  
1181 83492)

1182 **Hexham Golf Course (Hexham, Northumberland, England)**

1183 *Contact person: Chris Fowler*

1184 Recovered in 1921, the human remains were found in a short cist oriented north-south  
1185 on a natural prominence. No artefacts were located, nor were any other archaeological  
1186 features noted. Recent osteological analysis identified the individual as approximately  
1187 22–28 years old at death<sup>94</sup>. Some of the remains show signs of exposure to high  
1188 temperatures. Ancient DNA analysis reveals the sex as female. The radiocarbon date  
1189 confirms an Early Bronze Age date for this burial:

- 1190 • I2609/MOA 1956.46 Box 136: 2023–1772 calBCE (3560±40 BP, Poz-83423)

1191 **Reaverhill (Barrasford, Northumberland, England)**

1192 *Contact person: Chris Fowler*

1193 The short cist at Reaverhill was situated on the summit of a hill, oriented northeast-  
1194 southwest, and was excavated in 1964. Smaller stones were packed into voids between  
1195 the solid side and cover slabs, and the base was gravel subsoil without paving. The cist  
1196 yielded a copper alloy flat-riveted dagger blade, with all 3 rivets present, and the partial  
1197 remains of an adult that were ‘in disorder’<sup>95</sup>. The ancient DNA analysis confirms the  
1198 osteological sex identification of male, and anthropological analysis suggests that he  
1199 was about 30–40 years old at death<sup>94</sup>. The radiocarbon date for this individual is:

- 1200 • I2618/MOA 1964.2 Box 102A: 2135–1951 calBCE (3660±28 BP, OxA-26254)

1201 **Summerhill (Blaydon, Tyne & Wear, England)**

1202 *Contact person: Chris Fowler*

1203 A series of short cists are recorded spread over several hundred metres at Blaydon, and  
1204 at least five were excavated in the 1930s<sup>94</sup>. Cists 3 and 4 at Summerhill were excavated  
1205 in 1938<sup>96</sup>. One set of remains from the excavation of cists 3 and 4 is stored in the Great  
1206 North Museum although it is not certain whether these remains, which yielded aDNA  
1207 sample I2610, are from cist 3 or 4. Cist 3 contained a Food Vessel and a flexed skeleton  
1208 oriented north-northeast to south-southwest, lying on its left. Cist 4 contained a Beaker  
1209 and a burial oriented east-west, also laying on its left. Osteological analysis identified

1210 the remains as a female who was approximately 18 years old at death, and ancient DNA  
1211 confirms the sex attribution. The radiocarbon date for this individual is:

- 1212 • I2610/MOA 1973.4H Box 167D, 1: 1936–1746 calBCE (3515±35 BP, Poz-83498)

1213 The radiocarbon date would be late for the style of Beaker in cist 4, but fall within the  
1214 known currency of Food Vessels.

### 1215 **Trumpington Meadows (Cambridge, England)**

1216 *Contact person: Christopher Evans*

1217 The site was located alongside the River Cam on the southern fringes of the village of  
1218 Trumpington, to the south of the university town of Cambridge. The excavations were  
1219 conducted in 2010–11 and identified funerary activity and associated settlement remains  
1220 from the Neolithic, Bronze Age, Iron Age and Anglo-Saxon periods.

1221 The Beaker burial, F.1596, comprised two individuals buried in a sub-rectangular grave,  
1222 toe-to-toe, each with a fineware Beaker set close to their heads. Oriented north–south,  
1223 the grave was approximately 2.5 m long and 1 m wide. The bodies had been laid out so  
1224 that their positions almost exactly mirrored each other. Both were in a tightly crouched  
1225 position with their heads at opposite ends, each facing west and their feet intermingled.  
1226 It is not possible to say which individual was placed first: Burial 1 (Skeleton 3383), a  
1227 female aged 16–18yrs, was at the north of the grave, lying crouched on her right side;  
1228 Burial 2 (Skeleton 3384), a male 17–20yrs old, lay in the southern end crouched on his  
1229 left side. Their backs formed a straight line, parallel to the edge of the cut, suggesting  
1230 that they were interred at the same time. Both skeletons had elements that appear to that  
1231 have been displaced, possibly the result of differential post-mortem decomposition or  
1232 delayed burial. Genetic analysis determines that they are second-degree relatives, for  
1233 example niece-uncle, nephew-aunt or maternal half-siblings. The direct radiocarbon  
1234 dates for the skeletons are:

- 1235 • I3255/TRM10, skeleton [3383]: 2136–1951 calBCE (3661±31 BP, SUERC-49482)
- 1236 • I3256/TRM10, skeleton [3384]: 2204–2029 calBCE (3722±31 BP, SUERC-49483)

1237 **Over Narrows (Needingworth Quarry, Cambridgeshire, England)**

1238 *Contact person: Christopher Evans*

1239 A small Beaker cemetery underlay a Collared Urn-associated Bronze Age round barrow  
1240 (part of the Low Grounds barrow-group), located on one of the mid-stream *Over*  
1241 *Narrows* ridges where the River Great Ouse debouches into the fenland marshes. Its  
1242 main series of burials occurred within a deep pit-grave. First was F.1080 (Skeleton  
1243 5487, I2454), an adult female, 18–25 years of age. Lying crouched on her right side  
1244 (head to the north), she had a jet bead necklace and a Beaker placed by her head. The  
1245 pit-grave had, thereafter, been recut and an adult female, over 40 years old (F.1079,  
1246 Skeleton 5486, I2455), was interred in a tightly crouched position with her head to the  
1247 west. Both females were successfully analyzed for ancient DNA.

1248 Two infants were inserted into the feature's upper profile, with a third laid out within a  
1249 discreet pit beside (F.1074 & F.1075). Off to one side was a separate burial, F.1068  
1250 (Skeleton 5451), a young female adult of 17–20yrs. Lying crouched on her right side  
1251 (head to the northwest), she was accompanied by a fineware Beaker.

1252 We obtained genome-wide ancient DNA data from two individuals:

1253 • I2454/OVE08 feature F.1080 skeleton 5487: 2200–1980 calBCE (3703±28 BP,  
1254 OxA-24595)

1255 • I2455/OVE08, feature F.1079 skeleton 5486: 2130–1910 calBCE (3631±28 BP,  
1256 OxA-24594)

1257 **Dairy Farm (Willington, Bedfordshire, England)**

1258 *Contact person: Christopher Evans*

1259 The Willington landscape shows extensive occupation from the Upper Palaeolithic and  
1260 into the Saxon era. The Dairy Farm site comprises a steep clay landfall from 32 m to 21  
1261 m over the level of the river and this plateaus at 20–21 m over 1st and 2nd terrace  
1262 gravels along the valley of the River Great Ouse. Now covered by thick alluvium, the  
1263 lowest areas of the valley comprised small islands formed by small meandering  
1264 channels broken off from the main Ouse channels. This is illustrated at Dairy Farm with  
1265 an island that lies between the Ouse and Gadsey Brook. The island was clearly habitable  
1266 during the Late Mesolithic to Late Neolithic, as documented by surface artefacts.

1267 Access to the island declined in the Early Bronze Age, although elsewhere in the  
1268 landscape there are examples of Neolithic and earlier Bronze Age ceremonial and  
1269 funerary earthworks set upon such islands. A number of similar such funerary  
1270 earthworks are known at Dairy Farm, but as protected ancient monuments these were  
1271 not a part of the excavation program.

1272 Only limited Late Neolithic-Early Bronze Age flintwork has been found, and Beaker  
1273 pottery was confined only to the two known burials. Contemporary settlement activity  
1274 has, therefore, not been identified. The burials were both situated in proximity to the  
1275 monuments, but were shallow 'flat' graves with no obvious above-ground markers. A  
1276 mature adult male, F.66 (I2452), was found crouched on his left side, with a healed  
1277 compound fracture to the right femur. A notched flint dagger lay at the head, with a  
1278 fineware Beaker close to the feet. This individual was successfully analyzed with  
1279 ancient DNA. The other, F.192, was an unsexed adult in poor condition. Crouched on  
1280 its right side, the individual was accompanied with a copper alloy pin and a near-  
1281 complete Beaker vessel (fineware).

1282 The radiocarbon date for the individual analyzed in this study is:

- 1283 • I2452/BEDFM2009.12, feature F.66 skeleton 186: 2277–1920 calBCE [2277–2030  
1284 calBCE (3735±35 BP, Poz-83405); 2195–1920 calBCE (3700±30 BP, Beta-444979)]

### 1285 **West Deeping (Lincolnshire, England)**

1286 *Contact person: Christopher Evans*

1287 A 2007 investigation of the Middle Bronze Age field system and settlements at West  
1288 Deeping, close to the fen-edge in South Lincolnshire, revealed three Early Bronze Age  
1289 burials in close proximity. Of these, Burial 5 (F.320, I2453) contained a remarkable  
1290 series of grave goods. Tightly crouched within a shallow grave, the sub-adult lay on its  
1291 left side, with the knees on the chest, facing west. Five barbed-and-tanged arrowheads, a  
1292 flint flake, and a flake knife accompanied the body. A length of worked red deer antler  
1293 and a strip of cattle-sized rib bone were also present, with their position indicating that  
1294 they may have been attached to the back of the deceased. Their association with the  
1295 arrowheads suggests that they may have been archery-related, perhaps part of a bow or  
1296 as a quiver stiffener, or else as a pressure-flaker for the manufacture of barbed-and-  
1297 tanged arrowheads. While the burial lacked a Beaker (as did the other two graves, both

1298 of which had flint implements and, one, both a bone and antler pin), the accompanying  
1299 finds – especially the arrowheads – suggest a ‘Beaker-type’ assemblage. The  
1300 radiocarbon date for this individual is:

- 1301 • I2453/CQWDO7, feature F.320 skeleton 1126: 2289–2041 calBCE (3760±35 BP,  
1302 Poz-83404)

1303 **Windmill Fields, Ingleby Barwick (Stockton-on-Tees, County Durham, England)**

1304 *Contact person: Thomas Booth*

1305 The Windmill Fields site is an area of the Ingleby Barwick housing development in the  
1306 valley of the River Leven, on the southern edge of Stockton-on-Tees (NZ 4460 1255). It  
1307 was excavated in 1996 by Tees Archaeology in advance of construction<sup>97</sup>. The  
1308 excavations revealed a flat grave cemetery including six burials containing the remains  
1309 of at least 11 individuals. A diverse series of funerary traditions were represented by  
1310 these burials and radiocarbon dating of the human remains suggested that there was a  
1311 broad correlation between tradition and chronology, covering the Beaker period to the  
1312 Early Bronze Age. The oldest remains from the site had been disarticulated and placed  
1313 in a wooden cist. This style of deposition was followed by a tradition of unaccompanied  
1314 single articulated burial, then single articulated burial with grave goods.

1315 Disarticulated unaccompanied incomplete skeletons representing two adult males (Sk 3  
1316 and Sk 4) were recovered from the remains of a wooden cist. Histological analysis of  
1317 bone from Sk 3 suggested that these individuals had probably been exhumed<sup>98</sup>. Sk 3  
1318 and Sk 4 produced radiocarbon dates of 2397-2043 calBCE (2-sigma OxA-8652) and  
1319 2279-1982 calBCE (2-sigma, OxA-8728) respectively.

1320 A middle adult female (Sk 1) and a young-middle adult male (Sk 2) were recovered  
1321 unaccompanied from earthen graves. Sk 1 and Sk 2 had been disturbed by a digger, but  
1322 reconstructions of their positions suggested that Sk 1 had been buried flexed on their  
1323 right side with their head to the southwest whilst Sk 2 was buried lightly flexed on their  
1324 left side with their head to the southwest. Histological analysis of a femur from Sk 2  
1325 suggested that this individual had originally been mummified. Radiocarbon dating of Sk  
1326 1 produced a date of 2289-2036 calBCE (2 sigma, OxA-8650). Individual Sk 2 was  
1327 analysed with aDNA:

- 1328 • I1767/Sk2: 2200–1970 calBCE (3705±35 BP, OxA-8651)

1329 A complete articulated skeleton of an older adult female (Sk 7) was recovered from  
1330 another earthen grave. This burial had been disturbed by ploughing and it was difficult  
1331 to gauge its position and the original placement of the accompanying artefacts. Grave  
1332 goods included a piece of hematite and Beaker-style pottery. Individual Sk 7 was  
1333 analysed with aDNA:

- 1334 • I1765\_d/Sk7: 2330–2040 calBCE (3780±40 BP, OxA-8729)

1335 A complete articulated skeleton of a middle adult male (Sk 5) was found in an earthen  
1336 grave with a piece of hematite and a stone mace head. They were buried flexed on their  
1337 left side with their head to the east. Histological analysis of the bone suggested that this  
1338 was a primary inhumation. The radiocarbon date from this skeleton placed it later in the  
1339 Early Bronze Age at 1736-1614 calBCE (2-sigma, UB-7173).

1340 The remains of a young-middle adult female (Sk 6) had been buried in a tightly flexed  
1341 position on their right side with their head to the west. This was a rich burial containing  
1342 two copper alloy bangles, 41 tubular copper alloy beads, 25 v-perforated jet buttons,  
1343 one biconical jet bead and 75 small jet rings. Histological analysis of the bone suggested  
1344 that this was a primary inhumation. This skeleton produced an Early Bronze Age  
1345 radiocarbon date of 2029-1900 calBCE (2-sigma, UB-4174). The burial was  
1346 accompanied by disarticulated incomplete remains (mostly consisting of crania and long  
1347 bones) of an additional four individuals (Sk 8).

#### 1348 **Staxton Beacon (Staxton, North Yorkshire, England)**

1349 *Contact person: Oliver Craig*

1350 Staxton Beacon is a cemetery site located on the North Yorkshire wolds, near the  
1351 village of Staxton, and consists of a combination of round barrows and flat graves. A  
1352 flat grave cemetery was excavated by Stead in 1957, whilst one of the round barrows  
1353 (Staxton Beacon) was excavated by Manby in 1958-9<sup>99,100</sup>. The barrow included ten  
1354 inhumations and a cremation along with the remains of a partially-burnt wooden  
1355 structure. The burial tradition and grave furniture suggested that all individuals interred  
1356 in the Stanton Beaker barrow dated to the Beaker or Early Bronze Age period.  
1357 Palaeogenetic data from Burial 11 are included in the current study:

- 1358 • I1770/Burial11: 2400–1600 BCE

1359 **Yarnton (Oxfordshire, England)**

1360 *Contact person: Gill Hey*

1361 Yarnton is a large gravel extraction quarry situated in the Upper Thames Valley,  
1362 approximately 5 miles north of Oxford. Archaeological excavations took place between  
1363 1990 and 1998, during which time evidence of prehistoric settlement, burial and  
1364 landscape development was investigated, including inhumation burials of early (Beaker)  
1365 and middle Bronze Age date<sup>101</sup>.

1366 Beaker period skeletons 8772, 8633, 8784 and 8779 were found on the Summertown-  
1367 Radley gravel terrace overlooking the floodplain of the Thames, the first three of which  
1368 were placed in and around an earlier Neolithic U-shaped enclosure. Burial 8772 was an  
1369 adult female more than 45 years of age, who had been placed in a deep grave within the  
1370 entrance to the enclosure. She lay semi-crouched, on her left side, with her head to the  
1371 south-east, in a wooden coffin or on a bier. There were no grave goods. An infant  
1372 (8633), 12-14 months old, also positioned south-east to north-west, had been buried just  
1373 2m away.

1374 Skeleton 8784 lay in a shallow grave 6m south of the enclosure. The body was  
1375 disturbed and not so well preserved but is believed to be an adult aged upwards of 18  
1376 years, and possibly female (confirmed with aDNA data). The head lay to the south.  
1377 Thirty-five metres to the east was burial 8779, a neonate which had been placed in the  
1378 top of a pit with Beaker pottery, worked flint, a polished bone point, animal bone and  
1379 charred plant remains. The body had been disturbed but was articulated, and it is  
1380 uncertain whether the pit deposit was related to the death of this newborn or whether the  
1381 body was one of a number of symbolically-charged objects placed within the pit. We  
1382 obtained genome-wide ancient DNA data from four individuals:

- 1383 • I2443/SK 8772 (YCF 95), 2: 2290–1980 calBCE (3740±40 BP, OxA-8868)
- 1384 • I2445/SK 8633 (YCF 95): 2137–1930 calBCE (3650±35 BP, Poz-83407)
- 1385 • I2446/SK 8784 (YCF 95): 2460-2140 calBCE (3815±40 BP, OxA-8807)
- 1386 • I2447/SK 8779 (YCF 95): 2400–2040 BCE



1387 **Abingdon Spring Road cemetery (Abingdon, Oxfordshire, England)**

1388 *Contact person: Tim Allen*

1389 Skeleton 3036 came from Abingdon Spring Road cemetery, approximately 1km north-  
1390 west of Abingdon town centre, Oxfordshire, at NGR 448700 197620 on the  
1391 Summertown/Radley terrace of the Thames gravels<sup>102</sup>. It lay within a grave numbered  
1392 3037 that was orientated north-south, was sub-rectangular, and was 1.60m long 0.96m  
1393 wide and survived 0.14m deep. Skeleton 3036 was crouched in the central part of the  
1394 grave, measuring 1.16m from head to toes. It was lying on its right side with the head to  
1395 the south, and with the knees flexed, the right arm with the elbow out in front of the  
1396 body, and the left arm folded and the hand in front of the face. The skeleton was that of  
1397 an adult female of 20-24 years of age. A copper awl was positioned just below the upper  
1398 legs parallel to them. The radiocarbon date for this individual is:

- 1399 • I2450/SK 3036 (ABSRC00): 2460–2200 calBCE (3841±40 BP, NZA-15865;  
1400 3834±45 BP, NZA-15866).

1401 **Amesbury Down (Wiltshire, England)**

1402 *Contact person: Alistair Barclay*

1403 The site of Amesbury (Boscombe) Down is part of a large-scale housing development  
1404 that has taken place in several phases since the 1990s. It is located on an area of chalk  
1405 downland to the south-east of Amesbury and just outside the boundary of the  
1406 Stonehenge World Heritage Site. Excavations by Wessex Archaeology between 1993  
1407 and 2015 has revealed Neolithic monumental features, Beaker and other Early and  
1408 Middle Bronze Age burials and funerary deposits, numerous prehistoric pit deposits  
1409 (Powell and Barclay forthcoming). Some of the discoveries are of international  
1410 importance and include the Beaker burials known as the ‘Amesbury Archer’ and the  
1411 ‘Boscombe Bowmen’<sup>103</sup>. The site forms part of the wider Stonehenge monumental and  
1412 funerary landscape.

1413 In total ten burials from the site of Amesbury Down are included in this study. This  
1414 represents approximately 20% of the total number of individuals excavated from an  
1415 overall total of just over 30 graves. The date range of these burials goes from the final  
1416 Neolithic to the end of the early Bronze Age and includes a significant number of

1417 Beaker burials including a few of British Chalcolithic date. A number of the early  
1418 Beaker burials have rich and important grave assemblages. The site has some of the best  
1419 evidence from Britain for early Beaker non-local connections indicated by isotopic  
1420 (strontium/oxygen) analysis and material culture providing direct links with mainland  
1421 Europe – in particular the ‘Amesbury Archer’.

1422 Burial 25004 is one of the individuals from the collective burial known as the  
1423 ‘Boscombe Bowmen’, a type of burial that is unique to the site and generally difficult to  
1424 parallel in Wessex and Britain as a whole. The grave, which had been disturbed and  
1425 truncated by road construction and a service trench, produced the skeletal remains from  
1426 a minimum of nine individuals of which four were articulated. Grave goods include  
1427 eight beakers, seven of All-Over-Cord (AOC) type and one of Cord-Zoned-Maritime  
1428 (CZM) type, a boar’s tusk ‘scoop’, worked flints and an antler pendant. Because of the  
1429 nature of the grave it is difficult to directly associate any of the grave goods with a  
1430 particular individual with complete confidence. Among the British individuals dated to  
1431 after 2400 calBCE in our dataset, the skeleton from burial 25004 has the lowest amount  
1432 of steppe-related ancestry. The radiocarbon date for this individual is:

1433 • I2416/25004: 2460–2200 calBCE (3845±27 BP, OxA-13624)

1434 The ‘Boscombe Bowmen’ grave was later marked by a Bronze Age barrow, which in  
1435 turn became the focus for a small cemetery. Burial 25217 was placed in a grave just east  
1436 of this barrow. It contained the crouched skeleton of a probable subadult male (‘Amber  
1437 boy’) who was buried with a ‘necklace’ of over 80 small cylindrical amber beads. The  
1438 skeleton was directly dated by NZA-32497 (Powell and Barclay forthcoming):

1439 • I2639/25217: 1600–1430 calBCE (3225±25 BP, NZA-32497)

1440 Burial 1238, known as the ‘Companion’, was found 3 m east from the burial of the  
1441 ‘Amesbury Archer’ and contained the remains of an adult male<sup>103</sup> (Powell and Barclay  
1442 forthcoming). The burial included a pair of gold hair ornaments, a boar’s tusk and five  
1443 worked flints. The skeleton is directly dated by OxA-13562:

1444 • I2565/1238: 2470–2140 calBCE (3829±38 BP, OxA-13562)

1445 Burial 6033 (adult female) was found in a large chambered grave (6012) at the centre of  
1446 round barrow 6203 (Powell and Barclay forthcoming). The burial had been disturbed in  
1447 antiquity and was found in a partially articulated state. The grave also contained an

1448 antler tine, a flint arrowhead and a knife, and sherds of Beaker pottery. The skeleton is  
1449 directly dated by NZA-32788:

- 1450 • I2418/6033: 2440–2200 calBCE (3835±25 BP, NZA-32788)

1451 Burial 5289 was one of a pair (with 5292) from closely spaced graves (Powell and  
1452 Barclay forthcoming). Both contained single tightly crouched burials of a similar early  
1453 Bronze Age date. Burial 5289 was that of an adult male and contained no Beaker  
1454 material culture. The radiocarbon date for this individual is:

- 1455 • I2596/5289: 2280–2030 calBCE (3739±30 BP, NZA-32484)

1456 Burial 12134 was made in a large chamber cut into the natural chalk (Powell and  
1457 Barclay forthcoming). No evidence for a barrow was found, although it is possible that  
1458 the grave was marked by an earthen mound as two further burial deposits were added in  
1459 the Early Bronze Age, both associated with Food Vessels. At its base the chamber, part  
1460 of grave 12125, contained the burial of an adult male associated with a long-necked  
1461 ‘Southern’ style Beaker. The skeleton was directly dated by NZA-32494:

- 1462 • I2598/12134: 2140–1940 calBCE (3664±30 BP, NZA-32494)

1463 Burials 13382 and 13385 were found near the western edge of the overall site and close  
1464 to a timber post setting of Late Neolithic date. Both burials are considered to belong to  
1465 the Beaker culture, although only one (13385) contained a Beaker. Burial 13385 was  
1466 that of an adult male and contained a long necked Beaker of ‘Southern’ style. The  
1467 skeleton was directly dated by NZA-32490:

- 1468 • I2566/13385: 2210–2030 calBCE (3734±25 BP, NZA-32490)

1469 Burial 13382 also contained the remains of a male adult, which was directly dated:

- 1470 • I2457/13382: 2480–2031 calBCE [2480-2280 calBCE (3890±30 BP, SUERC-  
1471 36210), 2200-2031 calBCE (3717±28 BP, SUERC-69975)]

1472 The upper grave fill was cut by a secondary grave, which contained a cremation burial  
1473 (adult male) with a Food Vessel. A fragment of cremated human bone was directly  
1474 dated by 1750-1620 calBCE (3390±25 BP, NZA-32509).

1475 Burials 62027 and 62014 were found in the southern part of the site (Powell and  
1476 Barclay forthcoming). Burial 62014 was made in a cylindrical grave pit (62004) and

1477 was immediately south of pit 62025 that contained burial deposit 62027. Burial 62014 is  
1478 unusual in that the body had been placed on a deposit of burnt domestic material that  
1479 included charred grain, quernstone, a range of broken Beaker vessels, worked bone,  
1480 flintwork and daub. It is a non-typical Beaker funerary burial and has been identified as  
1481 a ‘domestic’ burial – one of two that occur at Amesbury<sup>104</sup>. The burial is that of a  
1482 probable male juvenile (9-11 yr) and is directly dated by SUERC-54823:

1483 • I2459/85684\_62014: 2460–2140 calBCE (3829±30 BP, SUERC-54823)

1484 Two similar radiocarbon dates were obtained on short-lived plant remains from the  
1485 underlying deposit. The dates are consistent with the British Chalcolithic and are similar  
1486 to those obtained for burials 25004 and 1238 (see above).

1487 Burial 62027 included a skull and was recovered from grave-like pit 62025, which may  
1488 represent a revisited burial deposit that was manipulated in antiquity. The skull is  
1489 directly dated by SUERC-53041:

1490 • I2460/62027: 2030–1820 calBCE (3575±27 BP, SUERC-53041)

#### 1491 **Porton Down (Wiltshire, England)**

1492 *Contact person: Alistair Barclay*

1493 The site is located on Porton Down, 1.5 km east of the village of Porton and to the  
1494 north-east of Salisbury. It was excavated during 2011 and 2015 by Wessex  
1495 Archaeology<sup>105</sup>. Burial 5108 (subadult female) was crouched and had the remains of a  
1496 neonate placed over its shoulder and right arm. No grave goods were present. Ancient  
1497 DNA data shows that the subadult female is the daughter of I2457/13382, who was  
1498 excavated in Amesbury Down (5 km apart from Porton Down). A radiocarbon date was  
1499 obtained from this female individual (SUERC-43374):

1500 • I2600/5108: 2140-1940 calBCE (3646±27 BP, SUERC-43374)

1501 The grave (5110) was a metre to the west of the central grave complex (5171) within a  
1502 segmented ring-ditch. Radiocarbon dates indicate that both the ditch and the primary  
1503 burial are of early Beaker or British Chalcolithic date. The ring-ditch contained a small  
1504 cemetery of Beaker and early Bronze Age date and is noteworthy for its relatively high  
1505 proportion of female and immature individuals. Other than pots, including Beakers, few  
1506 of the burials contained grave goods.

1507 **MOD Boscombe Down, Amesbury (Wiltshire, England)**

1508 *Contact person: Alistair Barclay*

1509 The site is located within the area of MOD Boscombe Down and on part of what is  
1510 known as Amesbury Down and forms part of the wider Stonehenge landscape<sup>106</sup>. The  
1511 airfield contains numerous barrows and is just south of the Newton and Earl's Farm  
1512 barrow groups and east of the important funerary landscape of Amesbury Down and its  
1513 important Beaker burials (the 'Amesbury Archer' and the 'Boscombe Bowmen'). The  
1514 burial, 62260\_39, was found during the groundworks for a new fire hydrant. It had been  
1515 badly disturbed but appeared to have been placed in a small oval grave that was covered  
1516 by a cairn of flint nodules. The grave contained the burial of an adult male (35-45 yr)  
1517 and four flint flakes. A radiocarbon date, NZA-28700, indicates that the burial was  
1518 made towards the end of the early Bronze Age and after Beakers had gone out of use:

- 1519 • I2464/62260\_39: 1750–1610 calBCE (3379±30 BP, NZA-28700)

1520 **East Kent Access (Phase II) (Thanet, Kent, England)**

1521 *Contact person: Alistair Barclay*

1522 The burials were found by Oxford Wessex Archaeology (Joint Venture) in excavations  
1523 ahead of the construction of the East Kent Access Phase II road scheme (EXEKA09)<sup>107</sup>.  
1524 Thanet is a former island on the most easterly point of Kent, an area well-known for its  
1525 concentration of barrows. The three sampled burials are from two of ten barrows  
1526 investigated on the route of the roadscheme, a number of which belong to larger barrow  
1527 cemeteries.

1528 Two of the burials, 126005 and 246136, were found within the interior of barrow  
1529 216090 (Zone 21) and are of early Bronze Age date. Burial 246136 contained the  
1530 crouched skeleton of a probable female subadult/adult (16-19 yr) as well as a triple  
1531 conjoined miniature Food Vessel, an amber button and a copper alloy pin. Burial  
1532 126005 contained the crouched remains of a probable female adult (40-55 yr). The third  
1533 burial, 136128, was one of a series of burials found within barrow 134097/193125  
1534 (Zone 13). The grave (136129) contained the crouched skeleton of a probable adult  
1535 male (35-45 yr). Radiocarbon dating (SUERC-40713, 40290 and 40721) indicates that  
1536 all three are similar in date and post-date the main period of Beaker use:

1537 • I2601/EXEKA09\_126005: 1960–1750 calBCE (3535±35 BP, SUERC-40713)

1538 • I2602/EXEKA09\_136128: 1900–1690 calBCE (3490±30 BP, SUERC-40290)

1539 • I2463/EXEKA09\_246136: 1930–1740 calBCE (3505±35 BP, SUERC-40721)

1540 **Totty Pot (Cheddar, Somerset, England)**

1541 *Contact person: Thomas Booth*

1542 Totty Pot is a cave in the Mendip Hills located around 5km east of Cheddar village (ST  
1543 4825 5358)<sup>108</sup>. The cave was discovered by Christopher Hawkes in 1960 and was  
1544 excavated by Hawkes, Willie Stanton and Wessex Cave Club between 1960 and 1965.

1545 The excavations uncovered a substantial collection of human and faunal bones as well  
1546 as a small lithic assemblage dating typologically to the Mesolithic. A small excavation  
1547 undertaken in 1998 by Gardiner and the University of Bristol found further Mesolithic  
1548 stone tools as well as a few small sherds of pottery dating to Beaker, Bronze Age and  
1549 Romano-British periods<sup>109</sup>.

1550 Unfortunately around half of the human bone assemblage was destroyed and the extant  
1551 collection consists of just sixty identified elements. Representation of smaller skeletal  
1552 elements as well as a lack of cortical weathering or scavenger gnawing suggests that  
1553 individuals had been deliberately interred in the cave soon after death and decomposed  
1554 *in situ*. At least six, but more likely seven, individuals are represented amongst the  
1555 remains: three or four adults (possibly two males and two females), an older child  
1556 (around 10-years-old) and two young children (2-3 and 3-6-years-old).

1557 An adult left humerus and left femur (TP 1) produced radiocarbon dates in the earlier  
1558 Late Mesolithic (7445-7080 calBCE (2-sigma combined, BM-2973, OxA-16457))<sup>110</sup>.  
1559 However, radiocarbon dates from a further five long bones produced dates spread  
1560 through the Neolithic. An adult left femur (TP 6, 3630-3370 calBCE, 2-sigma, OxA-  
1561 16458) dated to the Early Neolithic. A right ulna from a 2-3-year-old child (TP  
1562 2004.9/419, 3355-3035 calBCE (2-sigma, OxA-16462)) an adult left femur (2004.9/68,  
1563 3340-3025 calBCE (2 sigma, OxA-16459)) and a right femur from a 3-5-year-old child  
1564 (TP'63, 3335-2930 (2-sigma, OxA-16461)) produced dates in the Middle Neolithic. A  
1565 left femur from a 10-year-old child (TP 2004.9/257) dated to the Late Neolithic was  
1566 analyzed with aDNA:

1567 • I3049/TP 2004.9/257: 2830–2461 calBCE (4008±39 BP, OxA-16460)

1568 **Eton Rowing Course (South of Boveney Court, Buckinghamshire, England)**

1569 *Contact person: Tim Allen*

1570 Skeleton 5587 was found at the Eton Rowing Course on gravel terrace deposits on the  
1571 north bank of the river Thames (NGR 493533 177530), south of Boveney Court,  
1572 Buckinghamshire. It lay within a grave on the north edge of a natural hollow that  
1573 contained an extensive early Neolithic midden deposit, and which continued to receive  
1574 material in the middle and late Neolithic and the Beaker period<sup>111</sup>. The grave was  
1575 orientated ENE-WSW, and was 1.47m long and up to 0.66m wide, with a squared  
1576 western end and a more pointed eastern end. Skeleton 5587 was tightly crouched in the  
1577 central part of the grave, measuring 0.84m from head to toes. It was lying on its right  
1578 side with the head to the west, and with the knees drawn up and the arms folded, the  
1579 hands in front of the face. The skeleton was that of an adult female of 25-30 years A  
1580 sheep/goat mandible and a pike vertebra were recovered from the area between the ribs  
1581 and arms, and five flint flakes or blades were also recovered from the grave fill. The  
1582 radiocarbon date for this individual is:

1583 • I2605/SK 5587 (DBC 96): 3632–3373 calBCE (4710±35 BP, Poz-83483)

1584 **Banbury Lane (Northampton, Northamptonshire, England)**

1585 *Contact person: Oliver Craig*

1586 The Banbury Lane site is located to the southwest of Northampton (SP 725 582) and  
1587 was excavated by Northamptonshire Archaeology in 2012 in advance of a new housing  
1588 development<sup>112</sup>. The main feature was a Neolithic triple-ditched circular enclosure  
1589 monument. A large pit had been dug through the entranceway of the central ditch and  
1590 was found to contain the disarticulated and disordered remains of at least 145  
1591 individuals (Burial 1)<sup>113</sup>. The disarticulated remains of at least two young children had  
1592 been deposited in the outermost ditch around the same time (Burial 2). A later satellite  
1593 burial consisting of an unaccompanied single articulated adult skeleton was recovered  
1594 around 30m to the southwest of the monument (Burial 3).

1595 The remains from Burial 1 were tightly packed, with large bones (crania and long  
1596 bones) located towards the bottom and smaller bones placed towards the top of the pit.

1597 Osteological analysis suggested that Burial 1 included remains from adults and children,  
1598 although there was a bias towards young adult males. Refitting of bones and bone  
1599 fragments found that the remains of single individuals were distributed throughout the  
1600 deposit. Small bones of the hands and feet were almost completely absent. These  
1601 features suggested that the remains from Burial 1 had originally decomposed elsewhere  
1602 before they were transported to the triple-ditched monument. Possible scenarios include  
1603 primary interment in a tomb or long barrow, primary inhumation or excarnation. A  
1604 radiocarbon date obtained from a deer antler located beneath Burial 2 and relating to the  
1605 construction of the monument, was younger than dates obtained from Burials 1 and 2,  
1606 supporting suggestions these bones had been curated elsewhere for a time. The  
1607 positioning of the burial pit in the entranceway of the internal ditch suggested that  
1608 Burials 1 and 2 were taken to represent acts of closure, effectively decommissioning the  
1609 monument.

1610 Human remains from the top and bottom layers of Burial 1 produced consistent Middle  
1611 Neolithic radiocarbon date ranges of 3360-3100 calBCE (2-sigma – unpublished) and  
1612 3360-3090 calBCE (2-sigma). Burial 2 produced a date range of 3340-3020 calBCE (2  
1613 sigma), consistent with the dates from Burial 1. Burial 3 produced a Late Neolithic date  
1614 of 2860-2500 calBCE (2-sigma). All of the remains from Banbury Lane that were  
1615 analysed with aDNA came from Burial 1:

- 1616 • I0518/NBL11\_2016.1: 3360–3100 BCE
- 1617 • I0519/NBL11\_2011.2: 3360–3100 BCE
- 1618 • I0520/NBL11\_2002.1: 3360–3100 BCE

### 1619 **Canada Farm (Sixpenny Handley, Dorset, England)**

1620 *Contact person: Thomas Booth*

1621 Canada Farm is located on Cranborne Chase, near the village of Sixpenny Handley. The  
1622 site originally consisted of a round barrow funerary monument surrounded by a two-  
1623 phase penannular ditch, although the barrow mound has since been ploughed  
1624 away<sup>114,115</sup>. It was excavated in 2009 by Martin Green due to fears that it would  
1625 eventually erode away. Nine post holes located immediately to the northwest of the ring  
1626 ditch indicated the former presence of a circular wooden structure, possibly a mortuary  
1627 house or excarnation platform. The excavations identified a central grave pit containing



1628 a single inhumation burial (F1). Four satellite inhumation burials (F4, F5, F6, F8) and a  
1629 cremation inhumation (C1) had been cut into the second phase ditch, whilst one (F3)  
1630 was located just outside. Superficially, the completeness and correct anatomical  
1631 articulation of all of the skeletons suggested that they had been buried intact soon after  
1632 death. However, osteological and microscopic analysis suggested that most of the  
1633 bodies had been manipulated post mortem and that there had been a significant delay  
1634 between their deaths and final burial.

1635 F1 included the remains of a 25-30-year-old male on his left side facing east. The  
1636 remains had probably been interred inside a wooden coffin, and were accompanied by a  
1637 boar's tusk, an antler pendant or toggle, a flint flake and a Middle Rhine/Wessex style  
1638 Beaker. The skeleton was complete and mostly articulated, however the mandible had  
1639 been removed and placed in the northwest corner of the coffin. The proximal articular  
1640 ends of both humeri were slightly out of anatomical articulation. Signs of carnivore-  
1641 gnawing on some of the bones confirmed that there must have been a delay between this  
1642 individual's death and burial. Two radiocarbon dates obtained from this skeleton (2620-  
1643 2470 calBCE (2-sigma) and 2470-2290 calBCE (2-sigma)) were statistically  
1644 inconsistent with one another. It has yet to be resolved which of these dates is likely to  
1645 be most accurate, although both dates place the death of the individual at the beginning  
1646 of the Beaker period in Britain. Both dates are anomalously early when compared to the  
1647 typology of the accompanying Beaker pot, suggesting that the period between death and  
1648 burial was likely to have been a century or more. The correct anatomical articulation of  
1649 the skeleton inferred the persistence of substantial soft tissue. This observation, as well  
1650 as results from the histological analysis of the femur from this skeleton, were consistent  
1651 with this individual having been mummified previously.

1652 Burial F3 was located just outside the ditch phases and included the unaccompanied  
1653 remains of 12-13-year-old possible female buried supine with their legs flexed to the  
1654 right and their head to the southwest. Osteological and microscopic analysis identified  
1655 artificial drill holes in long bone diaphyses and epiphyses suggesting that the body had  
1656 been subject to significant post mortem manipulation. Histological analysis of these  
1657 bones indicated that the body had decomposed normally and that the drill holes may  
1658 represent holes for dowels used to peg the decomposing body together. A Middle  
1659 Bronze Age radiocarbon date was obtained from this skeleton (1620-1500 calBCE (2-  
1660 sigma, NZA-34642)).

1661 Burial F4 was cut into the second phase barrow ditch and contained the unaccompanied  
1662 remains of an 18-19-year-old male buried supine and tightly flexed with their head to the  
1663 southwest. Osteological examination found probable cut marks on the neck of the right  
1664 scapula, indicating that this individual had also been manipulated post mortem. This  
1665 Middle Bronze Age individual was analysed with aDNA:

- 1666 • I3082/Burial F4: 1500–1390 calBCE (NZA-34643)

1667 Burial F5 was also cut into the second phase ditch adjacent to F4. It included the  
1668 remains of a 10-12-year-old possible male interred supine with their legs tightly flexed  
1669 to the left and their head to the northeast. Drill holes similar to those found throughout  
1670 the F3 skeleton were observed on a metacarpal from F5. Histological analysis of the  
1671 tibia suggested F5 had been subject to similar post mortem treatment as F3. The F5  
1672 skeleton has not been radiocarbon dated but its proximity to F4 and similarity to F3 in  
1673 terms of funerary treatment suggested that it dates to the Middle Bronze Age.

1674 Burial F6 was cut into the second phase ditch and contained the unaccompanied remains  
1675 of a 3-4 year-old child flexed on its left side with its head to the northeast. There was no  
1676 osteological evidence for post mortem manipulation of the kind observed in the other  
1677 skeletons and histological analysis was consistent with this individual having been  
1678 buried intact soon after death. This skeleton has not been radiocarbon dated but was  
1679 assumed to date to the Middle Bronze Age.

1680 Burial F8 included the unaccompanied remains of a 17-25-year-old individual of  
1681 indeterminate sex. The skeleton had been severely plough-damaged, making it difficult  
1682 to determine its original position. Osteological analysis found no evidence for any  
1683 additional post mortem treatment. Histological analysis of a long bone from this  
1684 individual was consistent with them having been buried intact soon after death. This  
1685 skeleton has not been radiocarbon dated but is assumed to date to the Middle Bronze  
1686 Age.

### 1687 **Samborzec (Małopolska, Poland)**

1688 *Contact person: Piotr Włodarczyk*

1689 The site was located on the loess upland in the vicinity of the Vistula valley (western  
1690 Małopolska; SE Poland). The excavations were conducted in the 1960s<sup>116</sup>. A complex  
1691 of small cemeteries dated to the late and final Neolithic has been found (Złota, Corded

1692 Ware and Bell Beaker graves). The cemetery from the Bell Beaker period consisted of  
1693 10 graves. The features were linearly structured and oriented on the N-S axis. Grave pits  
1694 presented simple rectangular constructions without any additional outer elements. The  
1695 deceased were lying in contracted position, males to the left side and women to the right  
1696 side. Their equipment was typical for the Eastern group of the Beaker complex.

1697 Anthropologically, the skeletons from Samborzec show very characteristic  
1698 morphological traits distinguishing them from other Neolithic and Early Bronze groups  
1699 from SE Poland. The skulls are classified as short or very short. Their main  
1700 characteristic is the shape of the back part, namely the distinct flattening of the upper  
1701 part of the occipital bone and of an area of the parietal bone<sup>117</sup>. Such a morphology  
1702 suggests that this population was genetically foreign to the territory of Małopolska. We  
1703 obtained genome-wide ancient DNA data from three individuals:

1704 • I4251/RISE1122/grave no. 7: 2837-2672 BCE (3990±60 BP, Ki-7926). Male  
1705 inhumation burial (25-30 years) with northwest-southeast orientation, located on the left  
1706 side. The grave goods consisted of two vessels (bowl and unornamented cup), a flint  
1707 blade dagger and a flint scraper.

1708 • I4252/RISE1123/grave no. 1: 2463-2142 BCE (3820±50 BP, Ki-7921). Child  
1709 inhumation burial (11-13 years; genetically male) with northeast-southwest orientation,  
1710 located on the left side. There was a ceramic bowl and an undecorated cup.

1711 • I4253/RISE1124/grave no. 13: 2571-2208 BCE (3920±60 BP, Ki-7929). Male  
1712 inhumation burial (25-30 years), with N-S orientation, located on the left side. The only  
1713 element of equipment was a ceramic bowl, posed in the northern part of the grave.

#### 1714 **Budakalász, Csajerszke (M0 Site 12) (Hungary)**

1715 *Contact person: András Czene*

1716 The burial site of Budakalász is situated 1 km north of the boundary of Budapest, on the  
1717 right side of the Danube. A total of 4 hectares of the cemetery area were excavated in  
1718 2005–2006 and 3 more acres were surveyed by sounding trenches around the excavated  
1719 part of the cemetery. In this area, 943 graves from the Bell Beaker period have been  
1720 found. Most graves are cremation graves with the ashes in urns. The 58 inhumed burials  
1721 usually follow a north-south orientation, and occasionally a south-north one. The

1722 deceased usually lay on their side, in a slightly contracted position. The most frequent  
1723 types of grave goods are bowls and jugs laid by the feet. Copper objects, daggers, wrist-  
1724 guards, arrow heads were usually placed by the arm. Ongoing stable isotope analyses  
1725 and radiocarbon dates will be published in separate studies (Czene in prep., Kulcsár et  
1726 al. in prep).

1727 Grave 276 (I3528, GEN 85): Skeletal male burial with north-south orientation, located  
1728 on the left side, legs bent at the knees. At the southern part of the grave vessels and two  
1729 stone artefacts were found.

1730 • I3528/GEN85/Grave276: 2559–2301 calBCE (3931±31 BP, DeA-11507)

1731 Grave 597 (I3529, GEN 86): Skeletal male burial (female according to geneti sex) with  
1732 a south-north orientation, located on the right side, legs bent at the knees. A vessel was  
1733 placed at the legs and two small bone buttons with V-shape perforation were found at  
1734 the neck and at the inner part of the right arm.

1735 • I3529/GEN86/Grave597: 2500-2200 BCE

1736 **Budapest-Békásmegyer, Királyok útja (former Vöröshadsereg útja) (Hungary)**

1737 *Contact person: Anna Endrődi, Gabriella Kulcsár*

1738 The site is situated in northern part of Budapest, on the western bank of the Danube  
1739 River. Rózsa Kalicz-Schreiber uncovered 154 burials of the cemetery between 1960 and  
1740 1983, at Budapest, Békásmegyer–Királyok útja. The cemetery, according to her  
1741 estimates, had originally contained between 200-300 hundred graves. Inurned burials  
1742 dominated in the investigated cemetery section covering an area of 7700 m<sup>2</sup>. The  
1743 inhumation burials of the Békásmegyer cemetery contained jugs of the southern type  
1744 rather than the Bell Beakers type. No more than four of the 30 inhumation graves  
1745 yielded genuine Bell Beakers, while five contained various elements of the Beaker  
1746 package such as stone wrist-guards, stone arrow-heads and bone buttons with V-shaped  
1747 perforation. Jugs of the southern, Somogyvár–Vinkovci/proto-Nagyrev type were  
1748 deposited in 15 inhumation burials; nine inhumation graves did not contain any grave  
1749 goods. Eighteen of the 28 scattered cremation burials contained genuine Bell Beakers,  
1750 while three yielded locally made copies or bowls with a stamped rim. New radiocarbon  
1751 dates were generated for three burials of the Budapest–Békásmegyer cemetery. The

1752 individuals taken from inhumation burials yielded roughly similar dates for the  
1753 cemetery section: 3845±36 BP (Grave 193; DeA-2875), 3831±35 BP (Grave 432a;  
1754 DeA-2876), 3874±33 BP (Grave 445; DeA-2877). A Bayesian analysis of the three  
1755 AMS dates from the cemetery dates its use to approximately 2410–2220 calBCE<sup>118</sup>.

1756 Grave 219/B (I2364, GEN 10a): Double burial excavated in 1966. Two individuals  
1757 were lying on their right side in contracted position, without grave goods. Individual B  
1758 is an adult male. The radiocarbon date for this individual is:

1759 • I2364/GEN\_10a, Grave 219/B: 2470–2060 calBCE [2295–2060 calBCE (3779±28  
1760 BP, DeA-6749); 2470–2285 calBCE (3883±29 BP, DeA-7216)]

1761 Grave 452 (I2365, GEN 11a): Burial of an adult male lying of his left side, in contracted  
1762 position, excavated in 1982. The skeleton was incomplete, and oriented north-northwest  
1763 to south-southeast, with hyper-flexed legs. Pottery grave goods (a Bell Beaker, an urn, a  
1764 bowl, and a jug) were situated beside the lower leg, at the southern part of the grave pit.  
1765 Other grave goods include an arrowhead, and two stone tools.

1766 • I2365/GEN\_11a/Grave452: 2465-2205 calBCE [2465-2205 calBCE (3858±32 BP,  
1767 DeA-6762); 2465-2213 calBCE (3858±32 BP, DeA-7220)]

## 1768 **Szigetszentmiklós, Felső Ürge-hegyi dűlő (Hungary)**

1769 *Contact person: Róbert Patay*

1770 The cemetery is located in the northwestern part of Csepel Island near Budapest. The  
1771 archaeological investigation of the site was conducted between 2006 and 2007. A total  
1772 of 716 features were uncovered, amongst them 218 burials of the Bell Beaker period.  
1773 One remarkable feature of this burial ground is the unusually high proportion of  
1774 inhumation burials: 102 graves of the 218 excavated graves were inhumations. Another  
1775 element of the central European funerary tradition could also be documented in the  
1776 Szigetszentmiklós cemetery, namely inhumation performed according to strict rites. The  
1777 proportion of the deceased laid on the right and the left side was roughly equal and they  
1778 were oriented either northeast-southwest or southwest-northeast. Anthropological  
1779 analysis of the skeletal remains indicated that men were always interred on their left  
1780 side, while women were laid to rest on their right side, with the face turned toward the  
1781 east in the case of both male and female burials. A comparable burial practice was  
1782 observed in cemeteries of the Bell Beaker East Group in central Europe.

1783 A series of five AMS radiocarbon dates from the cemetery can be subjected to Bayesian  
1784 analysis. If we assume that the graves represent a single phase, the time span of the use  
1785 of the cemetery can be placed to approximately 2420–2190 calBCE<sup>118,119</sup>.

1786 Grave 49 (I2741, GEN 20): Male individual lying on his left side, in contracted position.  
1787 The rectangular shaped grave pit, oriented northeast–southwest, was enclosed by a  
1788 round ditch. Grave goods include a Bell Beaker, a bowl, a stone wrist-guard and a  
1789 dagger. The radiocarbon date for this individual is:

- 1790 • I2741/GEN\_20, Grave 49: 2458–2154 calBCE (3835±35 BP, Poz-83641)

1791 Grave 133 (I2786, GEN 56): Male individual lying on his left side, in contracted  
1792 position. The rectangular shaped grave pit, oriented northeast–southwest, was enclosed  
1793 by a round ditch. Grave goods include a bowl, a jug, and a stone silex. The radiocarbon  
1794 date for this individual is:

- 1795 • I2786/GEN\_56, Grave 133: 2459–2206 calBCE (3850±35 BP, Poz-83639)

1796 Grave 552 (I4178, GEN 58): Male individual lying on his left side, in contracted  
1797 position. The rectangular shaped grave pit, oriented northeast–southwest, was enclosed  
1798 by a round ditch. Grave goods include a Bell Beaker, and a bowl.

- 1799 • I4178/GEN\_58/Grave552: 2500-2200 BCE

1800 Grave 688 (I2787, GEN 59): Male individual lying on his left side, in contracted  
1801 position. The rectangular shaped grave pit, oriented northeast–southwest, was enclosed  
1802 by a round ditch. Grave good include a small jar. The radiocarbon date is:

- 1803 • I2787/GEN\_59/Grave 688: 2458–2202 calBCE (3840±35 BP, Poz-83640)

1804

1805 **SI 2- Experimental procedures**

1806

1807 In the Methods section we describe the experimental protocol followed for samples that  
1808 were processed at Reich's lab, Harvard Medical School, Boston. In this note we  
1809 described lab procedures for samples that were partially or completely processed at  
1810 other labs (Supplementary Table 1):

1811 *Libraries built at the Laboratory of Archaeogenetics of the Institute of Archaeology,*  
1812 *Research Centre for the Humanities, Hungarian Academy of Science, Budapest*

1813 Beaker period teeth and petrous bone samples from Hungary were taken under sterile  
1814 conditions in the Hungarian Museums and anthropological collections. Eight samples  
1815 were cleaned and powdered in Budapest, at the Laboratory of Archaeogenetics of the  
1816 Institute of Archaeology, Research Centre for the Humanities, Hungarian Academy of  
1817 Sciences, following published protocol<sup>120</sup>. DNA was extracted from 0.08-0.11g powder  
1818 via published methods<sup>121</sup>, using High Pure Viral NA Large Volume Kit columns  
1819 (Roche)<sup>122</sup>. DNA extractions were first tested by PCR, amplifying the np 16117-16233  
1820 fragment of the mitochondrial genome, and visualized on a 2% agarose gel. DNA  
1821 libraries were prepared from clean and successful extraction batches using “UDG-half”  
1822 repairing method<sup>123</sup>. We included milling (hydroxylapatite blanks to control for  
1823 cleanness) and extraction negative controls in every batch of libraries. Barcode adapter  
1824 ligated libraries were amplified with TwistAmp Basic (Twist DX Ltd.), purified with  
1825 Agencourt AMPure XP (Beckman Coulter), and checked on 3% agarose gel<sup>124</sup>. Library  
1826 concentration was measured on Qubit 2.0 fluorometer. After the initial quality control  
1827 analysis, promising libraries were shipped to Reich's lab.

1828

1829 *Libraries built at the National History Museum, London*

1830 DNA extractions and library preparations were conducted in a dedicated ancient DNA  
1831 laboratory at the National History Museum (London). We used approximately 25mg of  
1832 finely drilled bone powder and followed the DNA extraction protocol described in  
1833 Dabney *et al.* (2013)<sup>121</sup> but replaced the Zymo-Spin V column binding apparatus with a  
1834 high pure extender assembly from the High Pure Viral Nucleic Acid Large Volume Kit  
1835 (Roche). Library preparations followed partial uracil–DNA–glycosylase treatment<sup>123</sup>  
1836 and a modified version of the Meyer and Kircher (2010)<sup>125</sup> protocol: the initial DNA

1837 fragmentation step was not required and all clean-up steps used MinElute PCR  
1838 purification kits (Qiagen). The index PCR step included double indexing<sup>126</sup>, the  
1839 polymerase AmpliTaq Gold and the addition of 0.4mg/mL BSA. The index PCR was  
1840 set for 20 cycles with three PCR reactions conducted per library. Amplified libraries  
1841 were then shipped to Reich's lab

1842

1843 *Libraries built at the Australian Centre for AncientDNA, University of Adelaide*

1844 Libraries were prepared following the same protocol as in Haak et al. (2015)<sup>124</sup> and  
1845 shipped to Reich's lab.

1846

1847 *Libraries built at the Centre for GeoGenetics, Natural History Museum, University of*  
1848 *Copenhagen*

1849 The sampled teeth were prepared for Next Generation Sequencing following standard  
1850 procedures in the dedicated ancient DNA clean lab at Centre for GeoGenetics, Natural  
1851 History Museum, University of Copenhagen. We specifically targeted the root  
1852 cementum layer and combined this with a 'pre-digestion' step<sup>127</sup> prior to silica-in-  
1853 solution DNA isolation, optimized at recovering very short DNA fragments<sup>3</sup>. Double-  
1854 stranded, blunt-ended libraries were prepared as in Meyer and Kircher (2010)<sup>125</sup> with  
1855 modifications outlined previously<sup>127</sup>, and shipped to Reich's lab.

1856

1857 *Libraries built at the Institute for Archeological Sciences in Tübingen*

1858 Sampling was performed in the cleanroom facilities at the Institute for Archeological  
1859 Sciences in Tübingen on teeth selected from the human remains from the Lech Valley,  
1860 Bavaria, Germany. The teeth were treated with ultraviolet (UV) light from all sides for  
1861 10 min to reduce surface DNA contamination and then sawed transversally at the border  
1862 of root and crown before sampling dentine powder from the inside of the crown with a  
1863 sterile dentistry drill. Between 40 and 120 mg powder were used for each DNA  
1864 extraction following an established protocol<sup>121</sup>, resulting in 100µl of DNA extract for  
1865 each sample.



1866 An initial screening was performed by converting 20ul of extract into double-stranded  
1867 next-generation sequencing libraries<sup>125,126</sup> which were shotgun-sequenced and  
1868 sequenced after enrichment for human mitochondrial DNA<sup>128</sup>.

1869 For those samples that showed sufficient human DNA preservation and a low rate of  
1870 modern contamination on the mtDNA, uracil-DNA-glycosylase (UDG) treated  
1871 libraries<sup>123</sup> were prepared out of the 60 ul of DNA extract. These libraries were enriched  
1872 for a targeted set of ~1.2 million nuclear SNPs (1240k SNP set)<sup>124,129</sup>.

1873 Enriched libraries were paired-end sequenced on a HiSeq4000 at the IKMB in Kiel,  
1874 Germany, using 2x150+2x8 bp reads.

1875

### 1876 **SI 3- Y-chromosome analysis**

1877

1878 We performed Y-chromosome haplogroup analysis on all the male individuals in the  
1879 study, and here provide an overview of the results. Overall, Y-chromosome haplogroups  
1880 are highly correlated with steppe ancestry proportions in the nuclear genome.

1881 Iberian individuals with enough data to produce a reliable Y-chromosome haplogroup  
1882 determination belonged to haplogroups I2a2 and G2 (Supplementary Table 3), both  
1883 present in high frequencies in European Neolithic farmers<sup>124,130–132</sup> and also in Iberian  
1884 Copper Age populations. Haplogroup G2 probably entered Europe from the Near East  
1885 during the Neolithic expansion, and haplogroup I2a2 was likely introduced into the  
1886 Neolithic population through admixture with European hunter-gatherers. Two Iberian  
1887 individuals belonged to haplogroup R1b but likely not to R1b-L23 and therefore not to  
1888 R1b-S116/P312. Similar R1b haplogroups were present in low frequencies in Europe  
1889 during the Neolithic period, as they have been previously observed in both central  
1890 Europe (I0559) and Iberia (I0410)<sup>124</sup>.

1891 Outside Iberia, Beaker Complex individuals present a striking uniformity in paternal  
1892 lineages, with 37 out of 44 males (excluding relatives) belonging to haplogroup R1b  
1893 (Supplementary Table 3). Where R1b downstream mutations could be determined  
1894 (n=22), all but one were derived for the R1b-S116 mutation. One male belonged to  
1895 R1b-U106 and was excavated in The Netherlands, a place with relatively high  
1896 frequencies of R1b-U106 in present-day populations. Six individuals outside Iberia  
1897 without R1b Y-chromosomes were excavated in Hungary (n=4), Germany (n=1) and  
1898 England (n=1). Interestingly, most of these individuals presented low amounts of steppe  
1899 ancestry in the nuclear genome as compared to other individuals from the same regions  
1900 (Figure S1).

1901 Another striking observation is the haplogroup composition of Neolithic males in  
1902 Britain (n=25), who displayed entirely I2a2 and I2a1b haplogroups. Thus, there is no  
1903 evidence at all for a contribution to Neolithic farmers in Britain of the Y chromosome  
1904 haplogroups (e.g., G2) that were predominant in Anatolian farmers and in  
1905 Linearbandkeramik northern European farmers.

1906 We detect 10 males who belonged to R1b-L21/M529, all of them dated to the Beaker  
1907 and Bronze Age periods and excavated in Britain. This matches the high frequency of  
1908 this clade in modern populations from the British Isles.

1909

1910 We finally comment on three individuals with uncertain attributions:

1911 -Sample I0261 can be assigned to haplogroup R1b1a based on mutations  
1912 R1b1a:L1345:21558298G->T; R:F652:23631629C->A and R:M651:9889199G->A.  
1913 Haplogroups I, G, R1a and R1b1a1a2a can be excluded due to the presence of ancestral  
1914 alleles for I (CTS11979:23401471C->T), G (M3600:21954611G->A,  
1915 PF3134:15275200C->G), R1a (L145:14138745C->A) and R1b1a1a2a (L23:6753511G-  
1916 >A). Thus, it seems that I0261 belonged to R1b, but not to the R1b-S116/P312  
1917 (R1b1a1a2a1a2) clade that is present in most of the Beaker Complex individuals outside  
1918 Iberia.

1919 -Sample I0257 can be assigned to haplogroup R1b1 based on derived alleles at  
1920 mutations R1b1 (L1349: 22722580T->C) and R (P224:17285993C->T,  
1921 L1347:22818334C->T). Haplogroups I, G and H can be excluded due to the presence of  
1922 ancestral alleles for I (CTS2193:14214481G->T, PF3641:7688470 T->C,  
1923 PF3660:8466652G->A), G (CTS1283:7309873T->G, CTS2016.1:14155765G->A,  
1924 CTS2125:14190447A->G, CTS4761:15802681C->T, CTS9011:18615020A->T,  
1925 M3474:7930724C->A, PF3134:15275200G->C) and H (M2942:17887908A->G). This  
1926 individual and I0261 could belong to the same haplogroup, but for I0257 we cannot  
1927 exclude any R1b1 subclade.

1928

1929 **SI 4- *f*-statistics**

1930

1931 We computed *f*-statistics on the *HOIII* dataset using ADMIXTOOLS<sup>133</sup> using default  
1932 parameters. We computed standard errors using a weighted block jackknife approach<sup>134</sup>  
1933 over 5 Mb blocks.

1934 ***f*<sub>4</sub>-statistics**

1935 To increase statistical power to detect allele frequency differences, we grouped Beaker  
1936 Complex individuals excavated in nearby sites and presenting similar population  
1937 affinities. Specifically, we grouped individuals that satisfied the following conditions:

1938 - They were excavated in sites separated by less than 150 kilometers.

1939 - They did not significantly differ with regard to statistic  $f_4(\text{Mbuti, Test};$   
1940  $\text{Yamnaya\_Samara, Anatolia\_Neolithic})$ , using 1.5 standard errors as our criterion  
1941 (Figure S1a). We found that this *f*<sub>4</sub>-statistic is highly sensitive to ancestry differences  
1942 between Beaker Complex individuals, and is mainly affected by different levels of  
1943 steppe-related ancestry, which is the main cause of genetic differentiation in our dataset.

1944 - They were processed using the same UDG treatment. We do not co-analyze non-  
1945 UDG-treated and UDG-treated individuals.

1946 We then recomputed the statistic  $f_4(\text{Mbuti, Test}; \text{Yamnaya\_Samara, Anatolia\_Neolithic})$   
1947 (Figure S1b) with the new grouping scheme in Table S1. We used this scheme for *f*<sub>4</sub>-  
1948 statistics, outgroup *f*<sub>3</sub>-statistics and *qpAdm/qpWave* analysis.

1949 ***Details on notable results from f-statistic analysis reported in the main manuscript***

1950

1951 *Presence of steppe ancestry in two individuals from Arroyal I (Burgos, northern Spain)*

1952 We show in Table S2 *f*<sub>4</sub>-statistics of the form  $f_4(\text{Mbuti, Test}; \text{Iberia\_Chalcolithic\_MIR,}$   
1953  $\text{BB\_Spain\_Arr2})$ . Several populations are asymmetrically related to  
1954 Iberia\_Chalcolithic\_MIR and BB\_Spain\_Arr2 (individuals I0461 and I0462). Two  
1955 populations with steppe-like ancestry, EHG ( $Z=3.5$ ) and Yamnaya\_Kalmykia.SG  
1956 ( $Z=3.2$ ), are significantly closer to BB\_Iberia\_Arr2 than to Iberia\_Chalcolithic\_MIR. In  
1957 Table S2 we find BB\_Spain\_Arr1 (individuals I0459 and I0460) and  
1958 Iberia\_Chalcolithic\_MIR to be symmetrically related to ancient West Eurasian  
1959 populations. This confirms the visual impression from PCA (Extended Data Fig. 1a)  
1960 and supports separation of Arroyal I individuals into two groups, BB\_Spain\_Arr2 with

1961 steppe ancestry and BB\_Spain\_Arr1 without. To our knowledge, the BB\_Spain\_Arr2  
1962 individuals represent the oldest observation of steppe ancestry in Iberia.

1963 *Ancestry heterogeneity in Haut-Rhin (France)*

1964 In Table S2 we show that BB\_France\_Heg (one individual from Hégenheim) and  
1965 BB\_France\_HAR (two individuals excavated a few kilometers from Hégenheim) are  
1966 not symmetrically related to ancient West Eurasians. Populations with steppe-related  
1967 ancestry such as EHG ( $Z=6.3$ ) or Yamnaya\_Samara ( $Z=8.2$ ) share more alleles with  
1968 BB\_France\_HAR than with BB\_France\_Heg, documenting very different population  
1969 affinities in individuals excavated from nearby sites.

1970 *Steppe ancestry in Beaker Complex individuals from southern France*

1971 We tested for symmetry between Beaker Complex individuals from southern France  
1972 (BB\_France\_Mar and BB\_France\_AHP) and Middle and Late Neolithic individuals  
1973 from the same region (France\_MLN). Steppe populations share more alleles with both  
1974 BB\_France\_Mar (Table S2) and BB\_France\_AHP (Table S2) than with France\_MLN.  
1975 This observation suggests that the arrival of the Beaker Complex in southern France  
1976 was mediated by migrants with steppe genetic affinities.

1977 *Population discontinuity in northern Italy*

1978 Our Beaker Complex individual from Parma is slightly shifted towards populations with  
1979 steppe ancestry in the PCA (Fig 1b). We tested for symmetry between BB\_Italy\_Par  
1980 and Remedello\_CA<sup>3</sup> (Table S2), a culture preceding the Beaker Complex in northern  
1981 Italy. Several steppe-like populations such as EHG ( $Z=4.6$ ) or Yamnaya\_Samara  
1982 ( $Z=3.9$ ) share more alleles with BB\_Italy\_Par than with Remedello\_CA, indicating that  
1983 our Italian Beaker Complex individual harbors a steppe-related ancestry component not  
1984 present in the previous Remedello culture.

1985 *Ancestry heterogeneity at Szigetszentmiklós-Felső-Úrge hegyi dűlő (Hungary)*

1986 The Carpathian Basin represents the easternmost limit of the Beaker Complex  
1987 distribution. Our data set includes four individuals from the Szigetszentmiklós-Felső-  
1988 Úrge hegyi dűlő site in Hungary with very different genetic affinities (Extended Data  
1989 Fig. 1; Figure S1). To illustrate this, we tested for symmetry between the most extreme  
1990 individuals: BB\_Hungary\_Szi1 and BB\_Hungary\_Szi3 (Table S2). The analysis  
1991 supports high genetic differentiation between these two individuals, with steppe  
1992 populations sharing more alleles with BB\_Hungary\_Szi3 than with BB\_Hungary\_Szi1.

## 1993 **SI 5- *qpGraph* analysis**

1994

1995 In this section we model the relationships between populations in an Admixture Graph  
1996 framework with the software *qpGraph* in ADMIXTOOLS<sup>133</sup>, using the *HOIII* dataset.  
1997 This software takes as input an admixture graph and fits admixture proportions and drift  
1998 paths to the genetic data, trying to match as closely as possible the observed  $f$ -statistics  
1999 and reporting the difference between observed and predicted  $f$ -statistics.

### 2000 *Investigating the relationship among Neolithic/Chalcolithic European populations*

2001 Before the arrival of steppe ancestry, most of Europe was inhabited by closely related  
2002 populations with the same ancestry components: one component derived from  
2003 Anatolian farmers and the other from European hunter-gatherers. This does not mean,  
2004 however, that European Neolithic farmers from different parts of Europe were  
2005 undifferentiated from a genetic point of view.

2006 We began by exploring whether Middle/Late Neolithic and Chalcolithic (Copper Age)  
2007 populations share more affinity with any Early Neolithic population, computing  $f_4$ -  
2008 statistics of the form  $f_4(\text{Mbuti, Test}; \text{EN1, EN2})$  (Fig. 2b and Table S3). All the Iberian  
2009 populations (including Beaker associated groups) show genetic affinity to Iberia\_EN,  
2010 indicating some degree of continuity through the Neolithic and Copper Age periods. In  
2011 Hungary, continuity is also supported by Hungary\_LCA sharing more alleles with  
2012 Hungary\_EN than with other Early Neolithic populations. Interestingly, Neolithic  
2013 populations from Britain, Ireland and southern France share significantly more alleles  
2014 with Iberia\_EN than with central European Early Neolithic populations. However, the  
2015 data point to a complex pattern of relationships among these populations. For instance,  
2016 our Scotland\_Neolithic population (the Neolithic group with highest quality data) shares  
2017 significantly more alleles with both Iberia\_EN ( $|Z|=4.916$ ) and Hungary\_EN ( $|Z|=5.807$ )  
2018 than with LBK\_EN, and it is symmetrically related to Iberia\_EN and Hungary\_EN  
2019 ( $|Z|=0.627$ ).

2020 To verify that these observations were not driven by different proportions of hunter-  
2021 gatherer admixture, we modelled population relationships with *qpGraph*. We designed a  
2022 simple admixture graph that includes Anatolia\_Neolithic, Iberia\_EN, LBK\_EN and  
2023 WHG (Figure S2a), and fit our populations of interest as a mixture of WHG and  
2024 ancestry related to either LBK\_EN or Iberia\_EN (Figure S2b). Models fitting

2025 populations from Iberia, southern France and Britain as a clade with LBK\_EN show a  
2026 poor fit to the data (Figure S2c), even though the differences in WHG ancestry  
2027 proportion (higher in Iberia\_EN than in LBK\_EN) are explicitly modelled. In contrast,  
2028 these populations can be well modelled as a clade with Iberia\_EN (Figure S2c). We  
2029 next added Hungary\_EN into the admixture graph (Figure S3a) and fit our populations  
2030 of interest as a mixture of WHG and ancestry related to either LBK\_EN, Iberia\_EN or  
2031 Hungary\_EN (Figure S3b). Most Iberian groups and England\_Neolithic are consistent  
2032 with being a clade with Iberia\_EN but not with LBK\_EN or Hungary\_EN (Figure S3c).  
2033 Two populations (France\_MLN and Scotland\_Neolithic) that show genetic affinity to  
2034 both Iberia\_EN and Hungary\_EN in  $f_4$ -statistics (Table S3) cannot be well modelled as  
2035 a simple clade with any of the three Early Neolithic populations. In both cases, the fit  
2036 improves when they are modelled as having ancestry from both a clade related to  
2037 Iberia\_EN and Hungary\_EN (Figure S4). To generate confidence intervals for the  
2038 ancestry proportion from the Iberia\_EN-related clade, we computed the approximate  
2039 log-likelihood of the admixture graph model<sup>133</sup> for a grid of values from 0 to 1 in  
2040 increments of 0.01 (Extended Data Fig. 3). We integrated the interpolated likelihood  
2041 surface and used this to compute a 95% central confidence interval. We obtained a 95%  
2042 confidence interval of 51.3–70.8% Iberia\_EN-related ancestry for Scotland\_Neolithic  
2043 and 61.7–84.2% for France\_MLN.

2044 These observations suggest that Neolithic populations from both Britain and southern  
2045 France derive part of their ancestry from the Mediterranean route of Neolithic  
2046 expansion. We caution, however, that the relationships between Neolithic European  
2047 populations are likely very complex, including multiple admixture events<sup>135</sup>, and that  
2048 the available ancient DNA data are still sparse (especially for the Early Neolithic  
2049 period). As a consequence, the admixture graph models presented here likely represent  
2050 a simplification of the true history relating these populations.

2051

## 2052 **SI 6- *qpAdm* analysis**

2053

2054 In this section we aim to fit the ancestry of our populations/individuals of interest into  
2055 genetic models with estimated mixture coefficients. We use the knowledge gained in  
2056 previous sections to investigate different models under the framework described in  
2057 Haak et al<sup>124</sup> and implemented in *qpAdm* (<https://github.com/DReichLab>). These  
2058 methods relate a *Test* population to a set of *Outgroup* populations via a set of *Reference*  
2059 populations. If the *References* share different amounts of genetic drift with the  
2060 *Outgroups*, mixture coefficients can be estimated without having to explicitly model the  
2061 relationship between the *Outgroups* and the *References*.

2062 We carried out the analysis on the *HOIII* dataset and used a basic set of 9 *Outgroups*:  
2063 Mota, Ust\_Ishim, MA1, Villabruna, Mbuti, Papuan, Onge, Han, Karitiana. These  
2064 populations are located in informative places of the phylogeny and are unlikely to have  
2065 contributed directly to our *Test* populations.

### 2066 *Steppe ancestry in Beaker Complex individuals*

2067 With PCA, ADMIXTURE and *f*-statistics, we learned that our newly reported  
2068 individuals reside along the Yamnaya-European Neolithic axis of genetic  
2069 differentiation. Thus, we tried to model them as a mixture of Yamnaya\_Samara +  
2070 Anatolia\_Neolithic + WHG (Table S4). These values were used for Fig. 2a. Many  
2071 populations can be explained by a mixture of Anatolia\_Neolithic + WHG without any  
2072 contribution from Yamnaya\_Samara, indicating a lack of steppe-related ancestry.

### 2073 *Investigating hunter-gatherer admixture in Neolithic/Chalcolithic Europe*

2074 A possible cause of genetic differentiation in Neolithic Europe is the presence of  
2075 differential affinity to hunter-gatherer individuals from different regions<sup>135</sup>. To  
2076 investigate this, we added ElMiron and GoyetQ116-1 to the 9 *Outgroups* set and  
2077 modelled Neolithic and Chalcolithic Europeans as a mixture of Anatolia\_Neolithic,  
2078 LaBraña1 (a Mesolithic hunter-gatherer from Spain) and KO1 (a hunter-gatherer from  
2079 Hungary found in a Neolithic context). This analysis reveals a striking pattern of more  
2080 LaBraña1-related hunter-gatherer ancestry in Iberian populations (Table S5; Extended  
2081 Data Fig. 2), especially in Iberia\_EN and Iberia\_MN where the hunter-gatherer ancestry  
2082 is modelled as 100% LaBraña1-related. If we use Loschbour instead of KO1 as a source



2083 we obtain similar results (Table S6), with the hunter-gatherer component in central  
2084 European populations residing beyond Loschbour in the LaBraña1-Loschbour cline.

#### 2085 *Testing possible sources for Neolithic ancestry in Beaker Complex individuals*

2086 To understand the ancestry of Beaker Complex individuals we wished to characterize  
2087 their Neolithic ancestry component, with a particular focus on determining whether  
2088 Beaker Complex individuals outside Iberia had Iberia-related ancestry.

2089 We learned in the previous section that, before the emergence of the Beaker Complex,  
2090 populations from Iberia and central Europe harboured some degree of genetic  
2091 differentiation. We thus took advantage of these differences and designed a *qpAdm*  
2092 analysis to test the fit of different Neolithic/Copper Age populations as a source for the  
2093 Neolithic component in Beaker Complex individuals. To increase power, we first split  
2094 our Beaker Complex dataset into two groups: individuals from Iberia and individuals  
2095 from outside Iberia. Then, we modelled their ancestry as a mixture of Yamnaya\_Samara  
2096 and one of the following Neolithic/Copper Age populations:

2097 -Iberia\_MN

2098 -Iberia\_Chalcolithic\_MIR

2099 -Iberia\_Chalcolithic\_ALA

2100 -Germany\_MN

2101 -Globular\_Amphora\_LN

2102 -Hungary\_LCA

2103 -TRB\_Sweden\_MN

2104 -France\_MLN

2105

2106 We used the basic set of 9 *Outgroups* and added LBK\_EN, Iberia\_EN, LaBraña1 and  
2107 ElMiron in order to increase our ability to detect differences in Iberia-related affinity.  
2108 We show in Table S7 mixture proportions and P-values for the different models. For  
2109 Beaker Complex in Iberia, populations outside Iberia are strongly rejected as sources  
2110 and only Iberian populations (Iberia\_MN, Iberia\_Chalcolithic\_MIR) show a good fit.  
2111 The other Chalcolithic Iberian population, Iberia\_Chalcolithic\_ALA, fails as a source  
2112 likely because it harbours more hunter-gatherer ancestry (Extended Data Fig. 2) than do  
2113 other Iberian populations. In contrast, for Beaker Complex individuals outside Iberia,  
2114 models using Iberian populations as a source for their Neolithic ancestry are rejected.  
2115 We obtain a good fit for Globular\_Amphora\_LN and TRB\_Sweden\_MN, two

2116 populations with a hunter-gatherer component close to KO1 on the cline defined by  
2117 LaBraña1-KO1 (Extended Data Fig. 2; Table S5), and beyond Loschbour on the cline  
2118 defined by LaBraña1-Loschbour (Table S6). Other central European populations such  
2119 as Germany\_MN or Hungary\_LCA are rejected, but their fit can be improved by adding  
2120 KO1 as a third source (Table S8), suggesting that the true admixing population likely  
2121 had more hunter-gatherer ancestry than either Germany\_MN or Hungary\_LCA.

2122 *The magnitude of population turnover in Britain associated with the Beaker Complex*

2123 In this section we modelled the ancestry of Beaker Complex and Bronze Age  
2124 individuals from Britain as a mixture of continental Beaker Complex (represented by  
2125 our Beaker Complex individuals from Tuijthoorn- Oostwoud, the Netherlands) and  
2126 Neolithic Britons, adding Anatolia\_Neolithic and Yamnaya\_Samara to the 9 *Outgroups*  
2127 to increase the power to distinguish between the two sources of ancestry (Table S9). In  
2128 Figure 3a we show admixture proportions for individuals with more than 100,000 SNPs,  
2129 ordered in chronological order (from left to right).

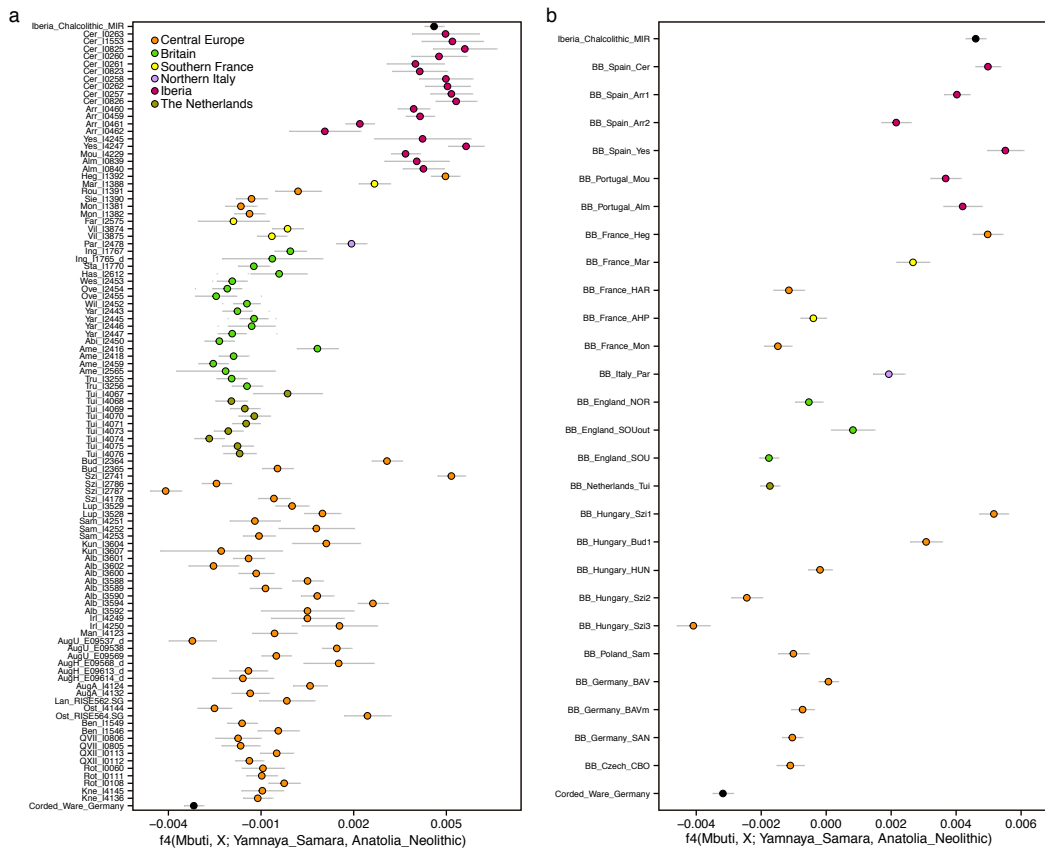

**Figure S1.**  $f_4$ -statistics of the form  $f_4(\text{Mbuti, Test; Yamnaya\_Samara, Anatolia\_Neolithic})$  measuring steppe affinities (more affinity to Yamnaya results in lower values of the statistic). **a**, Individually for each Beaker Complex individual. **b**, Using the grouping scheme in **Table S1**. Error bars represent  $\pm 1.5$  standard errors.

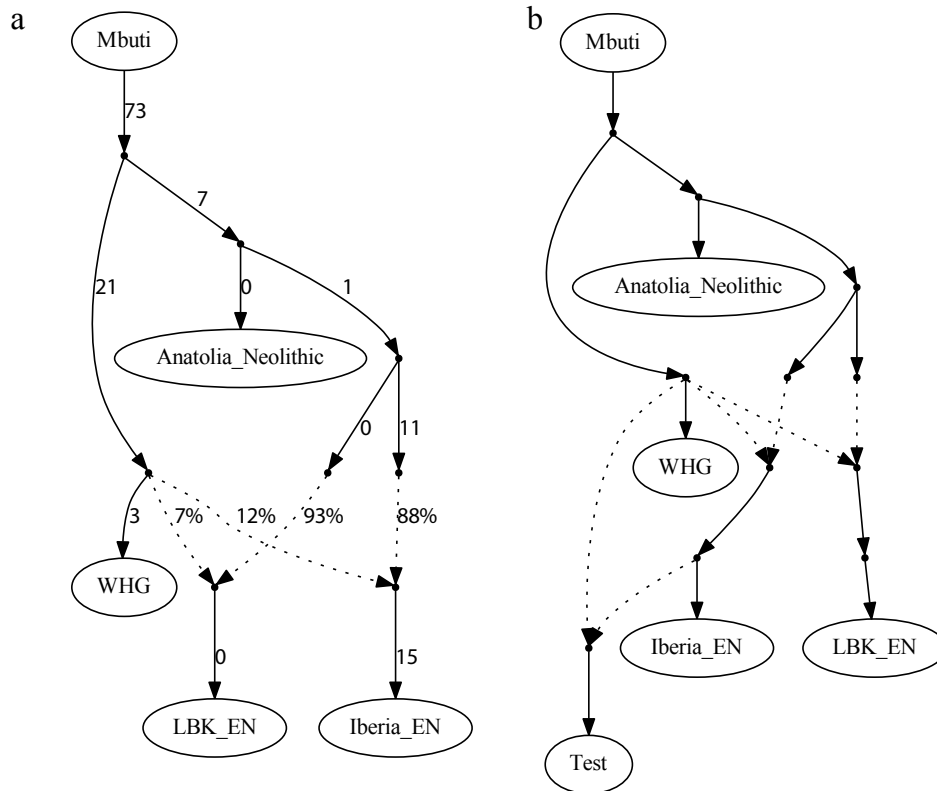

**c**

| Test                    | Z-score |           |
|-------------------------|---------|-----------|
|                         | LBK_EN  | Iberia_EN |
| Iberia_MN               | -9.209  | -2.189    |
| Iberia_Chalcolithic_POR | -4.43   | 1.87      |
| Iberia_Chalcolithic_MIR | -7.245  | -1.154    |
| Iberia_Chalcolithic_MUR | -3.806  | -1.792    |
| Iberia_Chalcolithic_ALA | -10.126 | -3.183    |
| France_MLN              | -6.779  | -2.826    |
| Globular_Amphora_LN     | -2.11   | -1.627    |
| Germany_MN              | -2.794  | -1.419    |
| Hungary_LCA             | -2.287  | -2.286    |
| TRB_Sweden_MN           | 0.757   | 0.731     |
| England_Neolithic       | -4.829  | -1.395    |
| Ireland_MN.SG           | -2.95   | 1.597     |
| Scotland_Neolithic      | -10.45  | -2.741    |
| BB_France_Heg           | 1.922   | 1.928     |
| BB_Hungary_Szi1         | -1.775  | 1.076     |
| BB_Portugal_Mou         | -3.998  | 2.371     |
| BB_Portugal_Alm         | -2.746  | 1.556     |
| BB_Spain_Yes            | -5.298  | 1.669     |
| BB_Spain_Cer            | -6.306  | 2.117     |
| BB_Spain_Arr1           | -5.133  | -1.867    |
| BB_France_Bur           | -6.536  | -2.091    |

**Figure S2. Modelling the relationships between Middle Neolithic/Copper Age and Early Neolithic European populations.** **a**, Admixture graph that models the relationships between Anatolia\_Neolithic, Iberia\_EN, LBK\_EN and WHG. All  $f$ -statistics agree between the model and data to within  $|Z|=1$ . **b**, Fitting *Test* populations with their farmer ancestry as a clade with Iberia\_EN or LBK\_EN (here with Iberia\_EN as an example). **c**, Z-scores for the worst-fitting  $f$ -statistic when inserting the test population into the model in (b) (highlighted if  $|Z|>3$ ).

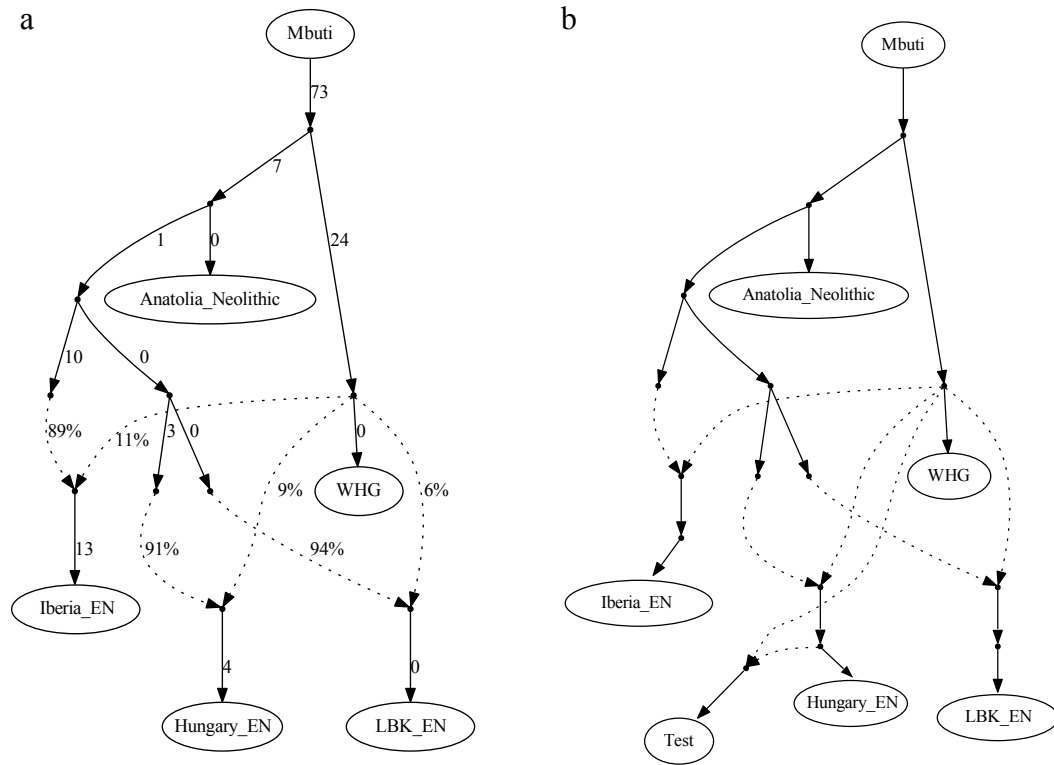

| Test                    | Z-score |           |            |
|-------------------------|---------|-----------|------------|
|                         | LBK_EN  | Iberia_EN | Hungary_EN |
| Iberia_MN               | -9.003  | -2.093    | -9.004     |
| Iberia_Chalcolithic_POR | 8.243   | 5.37      | 8.299      |
| Iberia_Chalcolithic_MIR | -7.216  | 1.747     | -7.22      |
| Iberia_Chalcolithic_MUR | -4.075  | -2.044    | -4.074     |
| Iberia_Chalcolithic_ALA | -9.456  | -5.265    | -9.712     |
| France_MLN              | -6.618  | -3.719    | -6.688     |
| Globular_Amphora_LN     | -3.302  | -3.407    | -2.112     |
| Germany_MN              | 3.482   | -2.079    | 3.52       |
| Hungary_LCA             | -3.178  | -3.178    | -2.449     |
| TRB_Sweden_MN           | 1.591   | 1.603     | 1.596      |
| England_Neolithic       | -4.749  | -1.663    | -4.762     |
| Ireland_MN.SG           | 5.23    | 3.829     | 5.249      |
| Scotland_Neolithic      | -9.466  | -7.664    | -9.876     |
| BB_France_Heg           | 2.031   | 2.049     | 2.082      |
| BB_Hungary_Szi1         | 3.245   | 3.203     | -1.993     |
| BB_Portugal_Mou         | -4.314  | 3.184     | -4.315     |
| BB_Portugal_Alm         | -2.793  | 1.631     | -2.807     |
| BB_Spain_Yes            | -5.326  | 1.619     | -5.326     |
| BB_Spain_Cer            | -6.43   | -2.233    | -6.435     |
| BB_Spain_Arr1           | 6.442   | 2.359     | 6.442      |

**Figure S3. Adding Hungary\_EN to the admixture graph model.** **a**, Admixture graph that models the relationships between Anatolia\_Neolithic, Iberia\_EN, LBK\_EN, Hungary\_EN and WHG. All  $f$ -statistics agree between the model and data to within  $|Z|=2$ . **b**, Fitting *Test* populations with their farmer ancestry as a clade with Iberia\_EN, LBK\_EN or Hungary\_EN (here with Hungary\_EN as an example) **c**, Z-scores for the worst-fitting  $f$ -statistic when inserting the test population into the model in (b) (highlighted if  $|Z|>3$ ).

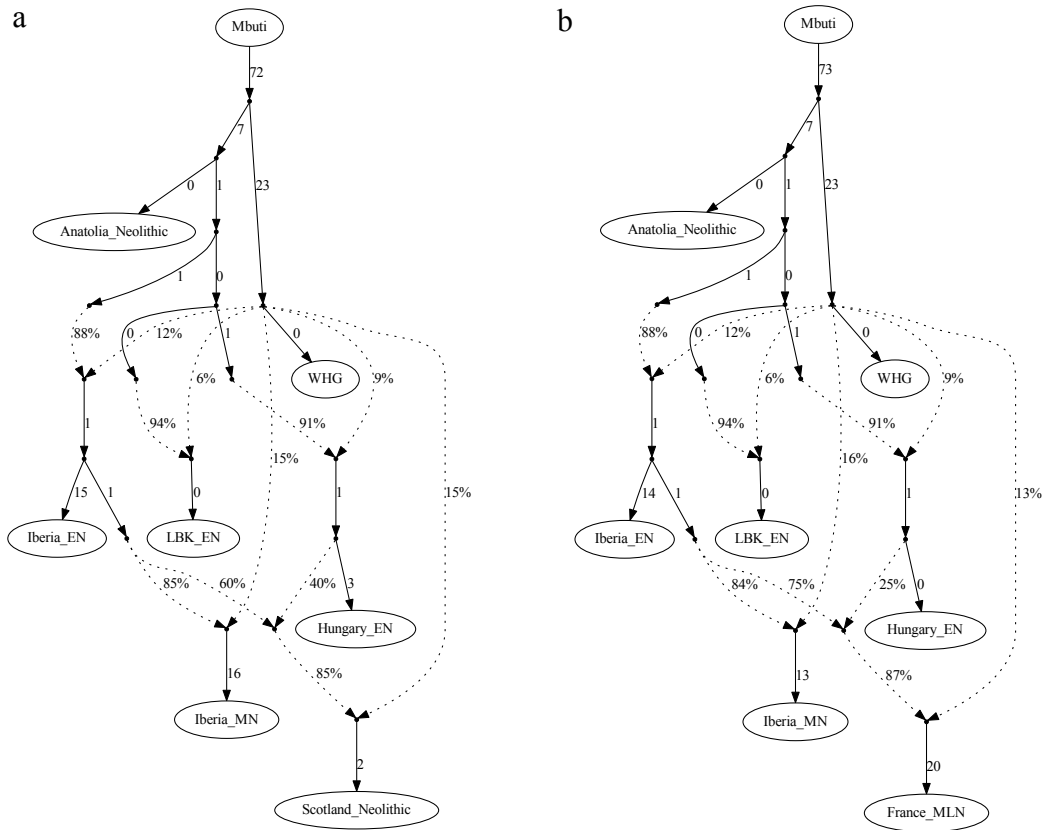

**Figure S4.** Admixture graphs fitting **a**, Scotland\_Neolithic and **b**, France\_MLN as a mixture of sources related to both Iberia\_EN and Hungary\_EN, plus WHG. Worst-fitting Z-score is -2.796 for **a** and -2.609 for **b**.

**Table S1.** Grouping scheme based on ancestry and geographic location.

| <b>ID</b> | <b>SiteID</b> | <b>Label</b>    |
|-----------|---------------|-----------------|
| I0263     | Cer           | BB_Spain_Cer    |
| I1553     | Cer           | BB_Spain_Cer    |
| I0825     | Cer           | BB_Spain_Cer    |
| I0260     | Cer           | BB_Spain_Cer    |
| I0261     | Cer           | BB_Spain_Cer    |
| I0823     | Cer           | BB_Spain_Cer    |
| I0258     | Cer           | BB_Spain_Cer    |
| I0262     | Cer           | BB_Spain_Cer    |
| I0257     | Cer           | BB_Spain_Cer    |
| I0826     | Cer           | BB_Spain_Cer    |
| I0458     | Arr           | BB_Spain_Arr1   |
| I0460     | Arr           | BB_Spain_Arr1   |
| I0459     | Arr           | BB_Spain_Arr1   |
| I0461     | Arr           | BB_Spain_Arr2   |
| I0462     | Arr           | BB_Spain_Arr2   |
| I4245     | Yes           | BB_Spain_Yes    |
| I4247     | Yes           | BB_Spain_Yes    |
| I4229     | Mou           | BB_Portugal_Mou |
| I0839     | Alm           | BB_Portugal_Alm |
| I0840     | Alm           | BB_Portugal_Alm |
| I1392     | Heg           | BB_France_Heg   |
| I1388     | Mar           | BB_France_Mar   |
| I1391     | Rou           | BB_France_HAR   |
| I1390     | Sie           | BB_France_HAR   |
| I1389     | Sie           | BB_France_HAR   |
| I1381     | Mon           | BB_France_Mon   |
| I1382     | Mon           | BB_France_Mon   |
| I2575     | Far           | BB_France_AHP   |
| I3874     | Vil           | BB_France_AHP   |
| I3875     | Vil           | BB_France_AHP   |
| I2478     | Par           | BB_Italy_Par    |
| I1767     | Ing           | BB_England_NOR  |
| I1765_d   | Ing           | BB_England_NOR  |
| I1770     | Sta           | BB_England_NOR  |
| I2612     | Has           | BB_England_NOR  |
| I2453     | Wes           | BB_England_SOU  |
| I2454     | Ove           | BB_England_SOU  |
| I2455     | Ove           | BB_England_SOU  |
| I2452     | Wil           | BB_England_SOU  |
| I2443     | Yar           | BB_England_SOU  |
| I2445     | Yar           | BB_England_SOU  |

|       |     |                        |
|-------|-----|------------------------|
| I2446 | Yar | BB_England_SOU         |
| I2447 | Yar | BB_England_SOU         |
| I2450 | Abi | BB_England_SOU         |
| I2416 | Ame | BB_England_SOU outlier |
| I2418 | Ame | BB_England_SOU         |
| I2459 | Ame | BB_England_SOU         |
| I2565 | Ame | BB_England_SOU         |
| I3255 | Tru | BB_England_SOU         |
| I3256 | Tru | BB_England_SOU         |
| I4067 | Tui | BB_Netherlands_Tui     |
| I4068 | Tui | BB_Netherlands_Tui     |
| I4069 | Tui | BB_Netherlands_Tui     |
| I4070 | Tui | BB_Netherlands_Tui     |
| I4071 | Tui | BB_Netherlands_Tui     |
| I4073 | Tui | BB_Netherlands_Tui     |
| I4074 | Tui | BB_Netherlands_Tui     |
| I4075 | Tui | BB_Netherlands_Tui     |
| I4076 | Tui | BB_Netherlands_Tui     |
| I2364 | Bud | BB_Hungary_Bud1        |
| I2365 | Bud | BB_Hungary_HUN         |
| I2741 | Szi | BB_Hungary_Szi1        |
| I2786 | Szi | BB_Hungary_Szi2        |
| I2787 | Szi | BB_Hungary_Szi3        |
| I4178 | Szi | BB_Hungary_HUN         |
| I3529 | Lup | BB_Hungary_HUN         |
| I3528 | Lup | BB_Hungary_HUN         |
| I4251 | Sam | BB_Poland_Sam          |
| I4252 | Sam | BB_Poland_Sam          |
| I4253 | Sam | BB_Poland_Sam          |
| I3604 | Kun | BB_Germany_BAV         |
| I3607 | Kun | BB_Germany_BAV         |
| I3601 | Alb | BB_Germany_BAV         |
| I3602 | Alb | BB_Germany_BAV         |
| I3600 | Alb | BB_Germany_BAV         |
| I3599 | Alb | BB_Germany_BAV         |
| I3588 | Alb | BB_Germany_BAV         |
| I3589 | Alb | BB_Germany_BAV         |
| I3590 | Alb | BB_Germany_BAV         |
| I3594 | Alb | BB_Germany_BAV         |
| I3592 | Alb | BB_Germany_BAV         |
| I3593 | Alb | BB_Germany_BAV         |
| I3597 | Alb | BB_Germany_BAV         |
| I4249 | Irl | BB_Germany_BAV         |



|            |      |                 |
|------------|------|-----------------|
| I4250      | Irl  | BB_Germany_BAV  |
| I4123      | Man  | BB_Germany_BAVm |
| E09537_d   | AugU | BB_Germany_BAV  |
| E09538     | AugU | BB_Germany_BAV  |
| E09569     | AugU | BB_Germany_BAV  |
| E09568_d   | AugH | BB_Germany_BAV  |
| E09613_d   | AugH | BB_Germany_BAV  |
| E09614_d   | AugH | BB_Germany_BAV  |
| I4124      | AugA | BB_Germany_BAVm |
| I4132      | AugA | BB_Germany_BAVm |
| RISE562.SG | Lan  | BB_Germany_BAVm |
| I4144      | Ost  | BB_Germany_BAVm |
| RISE564.SG | Ost  | BB_Germany_BAVm |
| I1549      | Ben  | BB_Germany_SAN  |
| I1546      | Ben  | BB_Germany_SAN  |
| I0806      | QVII | BB_Germany_SAN  |
| I0805      | QVII | BB_Germany_SAN  |
| I0113      | QXII | BB_Germany_SAN  |
| I0112      | QXII | BB_Germany_SAN  |
| I0060      | Rot  | BB_Germany_SAN  |
| I0111      | Rot  | BB_Germany_SAN  |
| I1530      | Rot  | BB_Germany_SAN  |
| I0108      | Rot  | BB_Germany_SAN  |
| I4145      | Kne  | BB_Czech_CBO    |
| I4136      | Kne  | BB_Czech_CBO    |

---



---

**Table S2.** Z-scores of statistics of the form  $f_4$  (Mbuti, Test, Pop1, Pop2). Negative values indicate that Test is closer to Pop1 than to Pop2, and the opposite for positive values. Significant values are highlighted ( $Z > 3$  in green,  $Z < -3$  in red).

| Test                        | $f_4$ (Mbuti, Test; Iberia_Ch_MIR, BB_Spain_Arr2) | $f_4$ (Mbuti, Test; Iberia_Ch_MIR, BB_Spain_Arr1) | $f_4$ (Mbuti, Test; BB_France_Heg, BB_France_HAR) | $f_4$ (Mbuti, Test; France_MLN, BB_France_Mar) | $f_4$ (Mbuti, Test; France_MLN, BB_France_AHP) | $f_4$ (Mbuti, Test; BB_Italy_Par, Remedello_CA) | $f_4$ (Mbuti, Test; BB_Hungary_Szi1, BB_Hungary_Szi3) |
|-----------------------------|---------------------------------------------------|---------------------------------------------------|---------------------------------------------------|------------------------------------------------|------------------------------------------------|-------------------------------------------------|-------------------------------------------------------|
| AfontovaGora3               | 3.011                                             | 0.053                                             | 6.744                                             | 1.182                                          | 7.176                                          | -3.053                                          | 6.799                                                 |
| Anatolia_Chalcolithic       | -2.541                                            | 0.341                                             | 0.007                                             | 0.223                                          | -2.643                                         | -0.441                                          | -2.214                                                |
| Anatolia_Neolithic          | -5.038                                            | -0.452                                            | -6.048                                            | -2.034                                         | -11.522                                        | 3.439                                           | -10.585                                               |
| Anatolia_Neolithic_Boncuklu | -2.045                                            | 0.439                                             | -2.883                                            | -1.363                                         | -6.451                                         | 1.801                                           | -5.143                                                |
| Anatolia_Neolithic_Kumtepe  | -0.340                                            | 0.995                                             | -0.382                                            | -0.468                                         | -3.392                                         | 0.912                                           | -3.236                                                |
| Anatolia_Neolithic_Tep_Cif  | -1.600                                            | 0.068                                             | -2.538                                            | -0.111                                         | -6.323                                         | 2.809                                           | -6.390                                                |
| Armenia_Chalcolithic        | -2.224                                            | 0.505                                             | 1.244                                             | 0.757                                          | -1.399                                         | -0.064                                          | -1.327                                                |
| Armenia_EBA                 | -0.513                                            | -0.976                                            | 1.682                                             | -0.491                                         | -1.550                                         | -0.725                                          | -0.806                                                |
| Armenia_MLBA                | 0.402                                             | 0.807                                             | 1.406                                             | 0.400                                          | 0.084                                          | -1.917                                          | 1.039                                                 |
| Bichon                      | -1.938                                            | 2.247                                             | 0.145                                             | 1.081                                          | -1.928                                         | -0.358                                          | -1.898                                                |
| Germany_MN                  | -2.977                                            | 0.634                                             | -3.370                                            | -0.482                                         | -6.846                                         | 2.067                                           | -7.829                                                |
| CHG                         | 2.281                                             | 2.102                                             | 3.098                                             | 0.621                                          | 2.498                                          | -2.023                                          | 4.127                                                 |
| Corded_Ware_Estonia.SG      | -0.952                                            | 0.354                                             | 1.686                                             | 0.326                                          | 0.412                                          | -0.618                                          | 1.240                                                 |
| Corded_Ware_Germany         | 1.358                                             | 0.132                                             | 5.461                                             | 2.208                                          | 3.766                                          | -3.408                                          | 3.777                                                 |
| Corded_Ware_Germany.SG      | 2.178                                             | 2.068                                             | 3.200                                             | -0.908                                         | 3.047                                          | 0.881                                           | 3.439                                                 |
| Corded_Ware_Poland.SG       | 0.509                                             | 0.523                                             | 0.922                                             | -0.708                                         | 0.153                                          | 0.334                                           | 1.194                                                 |
| EHG                         | 3.540                                             | 1.413                                             | 6.261                                             | 1.629                                          | 5.765                                          | -4.609                                          | 8.210                                                 |
| ElMiron                     | -0.589                                            | 0.017                                             | 0.309                                             | -0.705                                         | -3.123                                         | 0.998                                           | -1.799                                                |
| England_EBA                 | -1.754                                            | -1.954                                            | 5.323                                             | 0.064                                          | 0.600                                          | -4.739                                          | 1.352                                                 |
| England_EMBA                | -1.382                                            | -0.828                                            | 1.546                                             | 0.190                                          | 0.507                                          | -2.121                                          | 0.740                                                 |
| England_MBA                 | -1.867                                            | -1.197                                            | 1.139                                             | 0.279                                          | 0.188                                          | -1.727                                          | -0.178                                                |
| England_Neolithic           | -4.517                                            | -0.708                                            | -3.198                                            | -1.969                                         | -7.192                                         | 1.714                                           | -6.631                                                |
| Globular_Amphora_LN         | -3.989                                            | -0.401                                            | -2.301                                            | -1.874                                         | -7.597                                         | 1.035                                           | -8.263                                                |
| GoyetQ116-1                 | -0.207                                            | -0.819                                            | 1.438                                             | -0.338                                         | -0.890                                         | -2.180                                          | -0.140                                                |
| Greece_Early_Neolithic      | -1.235                                            | 1.729                                             | -4.487                                            | 0.748                                          | -5.668                                         | 4.519                                           | -5.694                                                |
| Greece_Final_Neolithic      | -1.998                                            | 1.412                                             | -4.787                                            | -1.498                                         | -6.249                                         | 3.160                                           | -5.947                                                |
| Greece_Late_Neolithic       | -2.191                                            | 1.416                                             | -3.540                                            | -2.233                                         | -5.145                                         | 5.645                                           | -6.893                                                |
| Alberstedt_LN               | 1.490                                             | 0.264                                             | -0.256                                            | 0.142                                          | -0.276                                         | 0.125                                           | 0.102                                                 |
| BattleAxe_Sweden.SG         | -1.723                                            | -0.634                                            | 3.248                                             | 0.453                                          | 1.116                                          | -1.030                                          | 1.226                                                 |
| BenzigerodeHeimbürg_LN      | 0.221                                             | -0.193                                            | 2.991                                             | 1.243                                          | -0.712                                         | -2.879                                          | -0.119                                                |
| Germany_Bronze_Age.SG       | -0.572                                            | 0.092                                             | -0.520                                            | 0.554                                          | -0.538                                         | 0.485                                           | -3.774                                                |
| Halberstadt_LBA             | 0.485                                             | 0.306                                             | 1.061                                             | 0.458                                          | 0.669                                          | -1.675                                          | -1.359                                                |
| Karsdorf_LN                 | 0.900                                             | 0.598                                             | 2.464                                             | -0.410                                         | 2.696                                          | -1.322                                          | 1.632                                                 |
| Nordic_BA.SG                | -1.258                                            | 0.556                                             | 0.557                                             | 0.063                                          | -1.378                                         | 0.888                                           | 0.048                                                 |
| Nordic_LBA.SG               | -0.086                                            | 0.477                                             | -0.276                                            | 1.676                                          | -1.787                                         | -1.729                                          | -0.287                                                |
| Nordic_LN.SG                | -0.101                                            | 0.408                                             | 2.244                                             | -0.125                                         | -0.299                                         | -0.899                                          | 1.832                                                 |
| Nordic_MN_B.SG              | 0.839                                             | 1.711                                             | 2.635                                             | 0.429                                          | 1.795                                          | 1.450                                           | 2.497                                                 |
| Starouetice_EBA.SG          | 0.149                                             | -0.841                                            | 1.759                                             | 1.777                                          | -0.094                                         | 0.713                                           | -0.091                                                |
| Unetice_EBA                 | -0.112                                            | 0.565                                             | 3.975                                             | 0.130                                          | 0.795                                          | -2.292                                          | 1.653                                                 |
| Unetice_EBA.SG              | 0.343                                             | 0.916                                             | 3.379                                             | 1.235                                          | 0.764                                          | -0.997                                          | 2.357                                                 |
| Hungary_BA                  | -3.436                                            | 1.471                                             | 0.867                                             | 0.509                                          | -2.742                                         | -0.875                                          | -2.299                                                |
| Hungary_CA                  | -3.955                                            | -1.668                                            | -3.439                                            | -0.471                                         | -5.276                                         | 2.017                                           | -6.150                                                |
| Hungary_EN                  | -6.034                                            | -1.774                                            | -4.549                                            | -1.676                                         | -9.486                                         | 1.449                                           | -10.501                                               |
| Hungary_LCA                 | -5.550                                            | -0.078                                            | -4.586                                            | -2.051                                         | -9.845                                         | 2.262                                           | -9.802                                                |
| France_MLN                  | -6.267                                            | -2.057                                            | -4.011                                            | -                                              | -                                              | 1.945                                           | -8.502                                                |
| Iberia_Bronze_Age.SG        | 0.641                                             | 1.410                                             | -1.582                                            | -1.894                                         | -2.927                                         | 0.610                                           | -3.858                                                |
| Iberia_Chalcolithic_ALA     | -7.150                                            | -1.577                                            | -4.562                                            | -2.618                                         | -11.287                                        | 1.982                                           | -9.482                                                |
| Iberia_Chalcolithic_MIR     | -                                                 | -                                                 | -4.479                                            | -3.315                                         | -11.460                                        | 1.280                                           | -10.556                                               |
| Iberia_Chalcolithic_MUR     | -3.292                                            | 0.511                                             | -3.432                                            | 0.270                                          | -3.843                                         | 1.262                                           | -4.064                                                |
| Iberia_Chalcolithic_POR     | -3.621                                            | 1.927                                             | -3.533                                            | -2.457                                         | -8.470                                         | 5.619                                           | -8.469                                                |
| Iberia_EN                   | -5.016                                            | -0.710                                            | -4.506                                            | -2.314                                         | -11.363                                        | 3.377                                           | -10.063                                               |
| Iberia_EN.SG                | -4.806                                            | -0.277                                            | -3.410                                            | -0.522                                         | -6.073                                         | 3.586                                           | -8.658                                                |
| Iberia_MN                   | -6.400                                            | -0.056                                            | -4.413                                            | -3.746                                         | -10.647                                        | 2.772                                           | -10.287                                               |

|                     |        |        |        |        |         |        |         |
|---------------------|--------|--------|--------|--------|---------|--------|---------|
| Iran_Chalcolithic   | -2.741 | 0.148  | 1.399  | 0.337  | -1.590  | -1.023 | -0.743  |
| Iran_IA             | 1.339  | 1.755  | -0.747 | 0.772  | -1.518  | 0.525  | -0.324  |
| Iran_Late_Neolithic | -0.113 | -0.343 | 0.546  | 0.705  | 0.282   | -2.002 | 1.400   |
| Iran_Mesolithic     | -0.723 | 0.598  | 2.207  | -0.463 | 1.174   | 0.015  | 1.356   |
| Iran_N              | 1.952  | 0.960  | 2.639  | 1.609  | 2.402   | -1.155 | 3.518   |
| Ireland_BA.SG       | 1.954  | 1.002  | 3.447  | 0.937  | 0.915   | 0.534  | 2.685   |
| Ireland_MN.SG       | -3.401 | 0.819  | -3.283 | -1.054 | -5.418  | 2.996  | -7.291  |
| Israel_Natufian     | -3.801 | -1.268 | -0.675 | -1.184 | -6.461  | 1.360  | -5.272  |
| Kostenki14          | 0.907  | 1.223  | 2.252  | -0.905 | -1.868  | -1.995 | -0.195  |
| LBK_EN              | -5.069 | -0.571 | -5.581 | -1.576 | -10.519 | 3.842  | -11.080 |
| Levant_BA           | -3.449 | -1.013 | -1.526 | -1.243 | -5.450  | -0.106 | -4.008  |
| Levant_N            | -4.634 | -1.883 | -3.754 | -0.960 | -9.027  | 1.086  | -5.511  |
| MA1                 | 0.783  | 0.429  | 4.935  | 0.540  | 4.924   | -4.054 | 5.065   |
| TRB_Sweden_MN       | -1.510 | -0.477 | -3.961 | 0.305  | -5.824  | 2.002  | -6.375  |
| mota                | 0.710  | 1.505  | 1.755  | -0.745 | -2.437  | 0.885  | -0.564  |
| Remedello_CA        | -2.234 | 1.320  | -1.696 | -0.922 | -7.586  | -      | -7.655  |
| Russia_EBA          | 2.804  | 1.967  | 4.139  | 0.642  | 2.551   | -0.839 | 5.056   |
| Samara_Eneolithic   | 2.990  | 1.679  | 6.458  | 3.264  | 6.603   | -3.234 | 7.290   |
| Scotland_EBA        | -1.901 | -1.618 | 2.551  | -0.048 | 0.875   | -3.263 | 1.051   |
| Scotland_MBA        | -2.060 | -0.666 | 4.046  | 2.012  | 0.950   | -3.102 | 1.125   |
| Scotland_Neolithic  | -6.644 | -2.311 | -4.612 | -2.501 | -11.560 | 1.559  | -11.194 |
| SHG                 | 0.236  | 1.959  | 5.003  | 1.174  | 2.385   | -1.715 | 3.247   |
| Ust_Ishim           | -1.149 | 0.500  | 2.735  | -0.677 | -0.760  | -0.631 | 1.248   |
| Vestonice16         | -0.765 | -1.524 | 0.920  | -0.277 | -0.602  | -2.186 | 0.457   |
| Villabruna          | -1.570 | 0.412  | 0.694  | -1.090 | -2.606  | -0.902 | -2.227  |
| Wales_BA            | -1.011 | -1.659 | 3.381  | -0.645 | -0.936  | -1.929 | 1.572   |
| WHG                 | -2.670 | 1.411  | 1.914  | -0.858 | -1.323  | -1.058 | -1.837  |
| Yamnaya_Kalmykia.SG | 3.179  | 1.400  | 6.243  | 2.403  | 6.580   | -2.618 | 10.079  |
| Yamnaya_Samara      | 2.830  | 1.350  | 8.197  | 3.974  | 7.745   | -3.904 | 9.981   |
| BB_Czech_CBO        | -1.879 | -1.467 | 1.124  | 1.097  | -1.223  | -1.626 | -0.244  |
| BB_England_NOR      | -2.558 | -1.320 | 2.819  | 1.012  | 0.854   | -2.710 | -0.376  |
| BB_England_SOUout   | -1.949 | -0.411 | 1.435  | -1.566 | -2.005  | -0.192 | -2.173  |
| BB_England_SOU      | -0.353 | -0.095 | 4.635  | 1.039  | 1.879   | -4.293 | 2.614   |
| BB_France_AHP       | -0.223 | 0.105  | 3.729  | 1.007  | -       | -2.580 | -0.721  |
| BB_France_Heg       | -4.488 | -1.465 | -      | -1.948 | -7.816  | -0.047 | -5.328  |
| BB_France_Mar       | -2.681 | -0.700 | -1.191 | -      | -3.525  | -0.669 | -3.083  |
| BB_France_Mon       | -0.098 | -0.452 | 2.713  | 1.638  | 1.399   | -2.554 | 2.542   |
| BB_France_HAR       | -0.155 | 0.733  | -      | 0.771  | 1.561   | -2.225 | 2.092   |
| BB_Germany_BAV      | -3.004 | -1.418 | 2.198  | 0.384  | -1.006  | -3.422 | 0.472   |
| BB_Germany_BAVm     | 0.086  | 0.067  | 1.492  | 2.856  | 1.580   | -0.825 | 0.856   |
| BB_Germany_SAN      | -1.307 | 1.717  | 3.383  | 0.288  | -0.137  | -1.846 | 0.785   |
| BB_Hungary_Szi1     | -4.071 | -1.770 | -3.493 | -2.143 | -7.657  | 0.844  | -       |
| BB_Hungary_Bud1     | -1.337 | 0.589  | -1.829 | -1.167 | -3.647  | 2.144  | -4.314  |
| BB_Hungary_HUN      | -0.568 | 1.428  | 1.270  | -0.702 | -1.103  | -1.391 | -0.832  |
| BB_Hungary_Szi2     | 0.440  | 0.493  | 3.145  | 0.272  | 1.784   | -0.970 | 2.508   |
| BB_Hungary_Szi3     | 1.761  | -0.599 | 3.683  | 1.321  | 1.532   | -4.379 | -       |
| BB_Italy_Par        | -2.660 | 0.428  | 0.249  | -0.028 | -1.667  | -      | -2.747  |
| BB_Netherlands_Tui  | -1.650 | -0.949 | 4.111  | 1.253  | 1.374   | -3.872 | 3.353   |
| BB_Poland_Sam       | -0.325 | 0.752  | 1.209  | 0.403  | 1.235   | -0.559 | 1.772   |
| BB_Portugal_Alm     | -3.295 | -0.850 | -1.304 | -2.282 | -5.613  | 0.990  | -2.576  |
| BB_Portugal_Mou     | -4.211 | -0.597 | -1.037 | -1.670 | -7.267  | 0.789  | -4.544  |
| BB_Spain_Arr1       | -3.325 | -      | -1.024 | -0.589 | -5.765  | 0.715  | -7.101  |
| BB_Spain_Arr2       | -      | 0.452  | 1.419  | -1.228 | -2.070  | 0.886  | -2.835  |
| BB_Spain_Cer        | -3.939 | 0.894  | -2.031 | -1.429 | -7.908  | 1.822  | -6.978  |
| BB_Spain_Yes        | -2.176 | -0.383 | -3.430 | -1.355 | -5.787  | 1.081  | -3.065  |

**Table S3.**  $f_4$ -statistics of the form  $f_4(\text{Mbuti, Test; EN1, EN2})$ . "EN" refers to Early Neolithic populations.

| Test                    | EN1-EN2          |        | EN1-EN2           |        | EN1-EN2              |        |
|-------------------------|------------------|--------|-------------------|--------|----------------------|--------|
|                         | Iberia_EN-LBK_EN |        | LBK_EN-Hungary_EN |        | Iberia_EN-Hungary_EN |        |
|                         | $f_4$            | Z      | $f_4$             | Z      | $f_4$                | Z      |
| Iberia_MN               | -0.001438        | -6.54  | 0.000124          | 0.758  | -0.001358            | -5.645 |
| Iberia_Chalcolithic_POR | -0.000832        | -3.755 | -0.000475         | -2.909 | -0.001309            | -5.59  |
| Iberia_Chalcolithic_MIR | -0.001057        | -5.664 | 0.000137          | 0.913  | -0.000899            | -4.389 |
| Iberia_Chalcolithic_MUR | -0.001405        | -3.162 | 0.000232          | 0.716  | -0.001076            | -2.129 |
| Iberia_Chalcolithic_ALA | -0.001202        | -6.057 | 0.000669          | 4.487  | -0.000531            | -2.503 |
| France_MLN              | -0.001077        | -4.426 | 0.00058           | 3.317  | -0.000514            | -1.999 |
| Globular_Amphora_LN     | -0.000103        | -0.441 | 0.000473          | 2.886  | 0.000323             | 1.301  |
| Germany_MN              | -0.000102        | -0.427 | -0.000186         | -1.049 | -0.000255            | -1.023 |
| Hungary_LCA             | 0.000353         | 1.898  | 0.000306          | 2.103  | 0.000625             | 3.153  |
| TRB_Sweden_MN           | -0.000021        | -0.074 | -0.000145         | -0.729 | -0.000146            | -0.488 |
| England_Neolithic       | -0.00079         | -3.014 | 0.000061          | 0.313  | -0.000707            | -2.615 |
| Ireland_MN.SG           | -0.000557        | -1.82  | -0.000565         | -2.728 | -0.001137            | -3.638 |
| Scotland_Neolithic      | -0.000841        | -4.916 | 0.000792          | 5.807  | -0.000116            | -0.627 |
| BB_France_Heg           | -0.00005         | -0.166 | 0.000157          | 0.766  | 0.000138             | 0.458  |
| BB_Hungary_Szil         | -0.000059        | -0.194 | 0.000315          | 1.471  | 0.000298             | 0.929  |
| BB_Portugal_Mou         | -0.000907        | -3.249 | 0.000286          | 1.36   | -0.000686            | -2.247 |
| BB_Portugal_Alm         | -0.000986        | -2.324 | 0.000394          | 1.321  | -0.000691            | -1.497 |
| BB_Spain_Yes            | -0.001448        | -3.597 | 0.000002          | 0.007  | -0.001486            | -3.68  |
| BB_Spain_Cer            | -0.000982        | -3.77  | 0.000416          | 2.216  | -0.000657            | -2.38  |
| BB_Spain_Arr1           | -0.000928        | -3.495 | -0.000187         | -0.957 | -0.001104            | -3.943 |

**Table S4.** Modelling populations as a mixture of Yamnaya\_Samara, Anatolia\_Neolithic and WHG. Table shows mixture proportions for each source population with standard errors, and P-values for the associated model.

| Test                        | Mixture proportions |       |                    |       |       |       |         |
|-----------------------------|---------------------|-------|--------------------|-------|-------|-------|---------|
|                             | Yamnaya Samara      | SE    | Anatolia Neolithic | SE    | WHG   | SE    | P-value |
| BB_Spain_Cer                |                     |       | 0.748              | 0.017 | 0.252 | 0.017 | 0.548   |
| BB_Spain_Arr1               |                     |       | 0.730              | 0.021 | 0.270 | 0.021 | 0.400   |
| BB_Spain_Arr2               | 0.178               | 0.055 | 0.627              | 0.056 | 0.194 | 0.025 | 0.013   |
| BB_Spain_Yes                |                     |       | 0.794              | 0.029 | 0.206 | 0.029 | 0.541   |
| BB_Portugal_Mou             |                     |       | 0.805              | 0.024 | 0.195 | 0.024 | 0.611   |
| BB_Portugal_Alm             |                     |       | 0.752              | 0.031 | 0.248 | 0.031 | 0.236   |
| BB_France_Heg               |                     |       | 0.808              | 0.025 | 0.192 | 0.025 | 0.449   |
| BB_France_Mar               | 0.173               | 0.063 | 0.617              | 0.061 | 0.211 | 0.027 | 0.994   |
| BB_France_HAR               | 0.489               | 0.055 | 0.359              | 0.054 | 0.153 | 0.024 | 0.250   |
| BB_France_AHP               | 0.509               | 0.043 | 0.295              | 0.041 | 0.195 | 0.018 | 0.552   |
| BB_France_Mon               | 0.513               | 0.046 | 0.346              | 0.045 | 0.141 | 0.02  | 0.733   |
| BB_Italy_Par                | 0.301               | 0.057 | 0.566              | 0.058 | 0.133 | 0.026 | 0.109   |
| BB_England_NOR              | 0.428               | 0.043 | 0.389              | 0.042 | 0.184 | 0.019 | 0.356   |
| BB_England_SOU              | 0.561               | 0.024 | 0.270              | 0.023 | 0.169 | 0.011 | 0.815   |
| BB_England_SOU outlier      | 0.307               | 0.085 | 0.477              | 0.086 | 0.216 | 0.037 | 0.996   |
| BB_Netherlands_Tui          | 0.557               | 0.027 | 0.255              | 0.026 | 0.188 | 0.012 | 0.259   |
| BB_Hungary_Szi1             |                     |       | 0.784              | 0.024 | 0.216 | 0.024 | 0.348   |
| BB_Hungary_Bud1             | 0.157               | 0.056 | 0.689              | 0.057 | 0.154 | 0.024 | 0.170   |
| BB_Hungary_HUN              | 0.449               | 0.035 | 0.385              | 0.033 | 0.166 | 0.016 | 0.478   |
| BB_Hungary_Szi2             | 0.565               | 0.059 | 0.322              | 0.059 | 0.114 | 0.024 | 0.631   |
| BB_Hungary_Szi3             | 0.743               | 0.058 | 0.211              | 0.058 | 0.047 | 0.024 | 0.094   |
| BB_Poland_Sam               | 0.462               | 0.062 | 0.383              | 0.06  | 0.155 | 0.024 | 0.071   |
| BB_Germany_BAV              | 0.421               | 0.027 | 0.431              | 0.026 | 0.148 | 0.011 | 0.830   |
| BB_Germany_BAVm             | 0.431               | 0.04  | 0.453              | 0.039 | 0.116 | 0.016 | 0.010   |
| BB_Germany_SAN              | 0.481               | 0.027 | 0.358              | 0.028 | 0.161 | 0.012 | 0.661   |
| BB_Czech_CBO                | 0.467               | 0.054 | 0.391              | 0.053 | 0.143 | 0.023 | 0.890   |
| England_Neolithic           |                     |       | 0.747              | 0.021 | 0.253 | 0.021 | 0.011   |
| Scotland_Neolithic          |                     |       | 0.705              | 0.009 | 0.295 | 0.009 | 0.591   |
| England_EBA                 | 0.525               | 0.029 | 0.314              | 0.028 | 0.161 | 0.012 | 0.065   |
| England_EMBA                | 0.470               | 0.065 | 0.397              | 0.062 | 0.133 | 0.026 | 0.209   |
| England_MBA                 | 0.510               | 0.058 | 0.323              | 0.055 | 0.167 | 0.027 | 0.473   |
| Scotland_EBA                | 0.465               | 0.037 | 0.327              | 0.037 | 0.209 | 0.017 | 0.710   |
| Scotland_MBA                | 0.516               | 0.034 | 0.314              | 0.034 | 0.170 | 0.014 | 0.270   |
| Wales_BA                    | 0.490               | 0.058 | 0.358              | 0.057 | 0.151 | 0.023 | 0.464   |
| France_MLN                  |                     |       | 0.709              | 0.019 | 0.291 | 0.019 | 0.206   |
| Iberia_Chalcolithic_MUR     |                     |       | 0.742              | 0.032 | 0.258 | 0.032 | 0.469   |
| <b>Previously published</b> |                     |       |                    |       |       |       |         |
| Iberia_Chalcolithic_MIR     |                     |       | 0.727              | 0.012 | 0.273 | 0.012 | 0.280   |
| Iberia_Chalcolithic_POR     |                     |       | 0.780              | 0.014 | 0.220 | 0.014 | 0.602   |
| Iberia_Chalcolithic_ALA     |                     |       | 0.669              | 0.012 | 0.331 | 0.012 | 0.331   |
| Globular_Amphora_LN         |                     |       | 0.730              | 0.016 | 0.270 | 0.016 | 0.188   |
| Iberia_MN                   |                     |       | 0.752              | 0.015 | 0.248 | 0.015 | 0.433   |
| Germany_MN                  |                     |       | 0.807              | 0.018 | 0.193 | 0.018 | 0.544   |
| TRB_Sweden_MN               |                     |       | 0.755              | 0.023 | 0.245 | 0.023 | 0.318   |
| Hungary_LCA                 |                     |       | 0.844              | 0.009 | 0.156 | 0.009 | 0.611   |
| Ireland_MN.SG               |                     |       | 0.787              | 0.025 | 0.213 | 0.025 | 0.360   |
| Corded_Ware_Germany         | 0.707               | 0.031 | 0.181              | 0.031 | 0.112 | 0.014 | 0.516   |

**Table S5.** Mixture proportions for the model Anatolia\_Neolithic + LaBraña1 + KO1.

| Test                    | P-value  | Mixture proportions   |       |          |       |        |       |
|-------------------------|----------|-----------------------|-------|----------|-------|--------|-------|
|                         |          | Anatolia<br>Neolithic | SE    | LaBraña1 | SE    | KO1    | SE    |
| Iberia_EN               | 3.91E-01 | 0.882                 | 0.017 | 0.133    | 0.048 | -0.015 | 0.047 |
| Iberia_MN               | 9.17E-01 | 0.686                 | 0.017 | 0.319    | 0.048 | -0.005 | 0.048 |
| Iberia_Chalcolithic_ALA | 9.92E-02 | 0.618                 | 0.013 | 0.219    | 0.041 | 0.163  | 0.041 |
| Iberia_Chalcolithic_MIR | 5.83E-01 | 0.681                 | 0.012 | 0.190    | 0.035 | 0.130  | 0.035 |
| LBK_EN                  | 3.95E-02 | 0.944                 | 0.009 | -0.004   | 0.027 | 0.059  | 0.027 |
| Germany_MN              | 2.19E-01 | 0.790                 | 0.019 | 0.024    | 0.055 | 0.186  | 0.055 |
| Globular_Amphora_LN     | 1.77E-01 | 0.707                 | 0.018 | 0.036    | 0.047 | 0.257  | 0.045 |
| Hungary_LCA             | 4.07E-01 | 0.833                 | 0.01  | -0.004   | 0.028 | 0.171  | 0.028 |
| TRB_Sweden_MN           | 6.52E-01 | 0.731                 | 0.025 | -0.012   | 0.075 | 0.281  | 0.072 |
| Britain_Neolithic       | 7.12E-01 | 0.673                 | 0.01  | 0.104    | 0.025 | 0.223  | 0.025 |
| France_MLN              | 2.31E-01 | 0.666                 | 0.02  | 0.166    | 0.057 | 0.168  | 0.057 |

**Table S6.** Mixture proportions for the model Anatolia\_Neolithic + LaBraña1 + Loschbour.

| Test                    | P-value  | Mixture proportions |       |          |       |           |       |
|-------------------------|----------|---------------------|-------|----------|-------|-----------|-------|
|                         |          | Anatolia Neolithic  | SE    | LaBraña1 | SE    | Loschbour | SE    |
| Iberia_EN               | 4.85E-01 | 0.870               | 0.021 | 0.178    | 0.071 | -0.048    | 0.056 |
| Iberia_MN               | 9.34E-01 | 0.680               | 0.021 | 0.345    | 0.071 | -0.025    | 0.056 |
| Iberia_Chalcolithic_ALA | 5.36E-01 | 0.676               | 0.016 | 0.100    | 0.057 | 0.224     | 0.046 |
| Iberia_Chalcolithic_MIR | 2.58E-01 | 0.714               | 0.014 | 0.155    | 0.051 | 0.131     | 0.041 |
| LBK_EN                  | 2.23E-02 | 0.960               | 0.011 | -0.013   | 0.037 | 0.054     | 0.03  |
| Germany_MN              | 2.71E-01 | 0.843               | 0.024 | -0.052   | 0.086 | 0.208     | 0.069 |
| Globular_Amphora_LN     | 2.01E-01 | 0.795               | 0.024 | -0.096   | 0.078 | 0.301     | 0.06  |
| Hungary_LCA             | 1.90E-01 | 0.883               | 0.013 | -0.061   | 0.045 | 0.179     | 0.036 |
| TRB_Sweden_MN           | 3.12E-01 | 0.816               | 0.036 | -0.104   | 0.119 | 0.288     | 0.092 |
| Britain_Neolithic       | 3.18E-01 | 0.735               | 0.01  | 0.021    | 0.037 | 0.244     | 0.031 |
| France_MLN              | 3.06E-01 | 0.724               | 0.026 | 0.069    | 0.092 | 0.207     | 0.073 |

**Table S7.** Modelling Beaker Complex (BC) populations as a mixture of Yamnaya\_Samara and different Neolithic/Copper Age populations. P-values > 0.05 are highlighted.

| Test                       | Neolithic source        | P-value  | Mixture proportions |                  |       |
|----------------------------|-------------------------|----------|---------------------|------------------|-------|
|                            |                         |          | Yamnaya Samara      | Neolithic source | SE    |
| BC Iberia combined         | Iberia_MN               | 1.99E-01 | 0.120               | 0.880            | 0.016 |
|                            | Iberia_Chalcolithic_MIR | 2.50E-01 | 0.100               | 0.900            | 0.014 |
|                            | Iberia_Chalcolithic_ALA | 1.49E-05 | 0.133               | 0.867            | 0.014 |
|                            | Germany_MN              | 1.25E-08 | 0.122               | 0.878            | 0.02  |
|                            | Globular_Amphora_LN     | 3.00E-06 | 0.090               | 0.910            | 0.016 |
|                            | Hungary_LCA             | 2.39E-41 | 0.187               | 0.813            | 0.014 |
|                            | TRB_Sweden_MN           | 4.69E-03 | 0.062               | 0.938            | 0.022 |
|                            | France_MLN              | 1.42E-03 | 0.127               | 0.873            | 0.017 |
| BC outside Iberia combined | Iberia_MN               | 5.36E-13 | 0.481               | 0.519            | 0.011 |
|                            | Iberia_Chalcolithic_MIR | 3.18E-08 | 0.477               | 0.523            | 0.01  |
|                            | Iberia_Chalcolithic_ALA | 7.24E-09 | 0.487               | 0.513            | 0.009 |
|                            | Germany_MN              | 2.29E-12 | 0.483               | 0.517            | 0.013 |
|                            | Globular_Amphora_LN     | 1.40E-01 | 0.434               | 0.566            | 0.01  |
|                            | Hungary_LCA             | 3.70E-39 | 0.538               | 0.462            | 0.009 |
|                            | TRB_Sweden_MN           | 2.88E-01 | 0.422               | 0.578            | 0.015 |
|                            | France_MLN              | 1.46E-04 | 0.475               | 0.525            | 0.012 |



**Table S8.** Modelling Beaker Complex (BC) populations as a mixture of Yamnaya\_Samara, KO1 and different Neolithic/Copper Age populations. P-values > 0.05 are highlighted.

| Test                       | Neolithic source        | P-value  | Mixture proportions |       |                  |       |        |       |
|----------------------------|-------------------------|----------|---------------------|-------|------------------|-------|--------|-------|
|                            |                         |          | Yamnaya Samara      | SE    | Neolithic source | SE    | KO1    | SE    |
| BC Iberia combined         | Iberia_MN               | 1.47E-01 | 0.118               | 0.017 | 0.876            | 0.02  | 0.005  | 0.018 |
|                            | Iberia_Chalcolithic_MIR | 3.19E-01 | 0.107               | 0.015 | 0.915            | 0.018 | -0.023 | 0.016 |
|                            | Iberia_Chalcolithic_ALA | 7.71E-02 | 0.160               | 0.015 | 0.925            | 0.019 | -0.085 | 0.018 |
|                            | Germany_MN              | 7.47E-05 | 0.086               | 0.021 | 0.824            | 0.022 | 0.090  | 0.018 |
|                            | Globular_Amphora_LN     | 1.47E-06 | 0.093               | 0.017 | 0.916            | 0.02  | -0.009 | 0.018 |
|                            | Hungary_LCA             | 2.71E-17 | 0.106               | 0.015 | 0.744            | 0.015 | 0.150  | 0.015 |
|                            | TRB_Sweden_MN           | 2.65E-03 | 0.061               | 0.023 | 0.935            | 0.028 | 0.004  | 0.023 |
|                            | France_MLN              | 7.49E-04 | 0.127               | 0.019 | 0.873            | 0.023 | -0.001 | 0.022 |
| BC outside Iberia combined | Iberia_MN               | 5.66E-13 | 0.472               | 0.012 | 0.510            | 0.012 | 0.018  | 0.011 |
|                            | Iberia_Chalcolithic_MIR | 1.82E-08 | 0.473               | 0.011 | 0.519            | 0.011 | 0.008  | 0.009 |
|                            | Iberia_Chalcolithic_ALA | 1.55E-07 | 0.498               | 0.01  | 0.532            | 0.012 | -0.030 | 0.011 |
|                            | Germany_MN              | 9.42E-02 | 0.445               | 0.012 | 0.469            | 0.012 | 0.085  | 0.01  |
|                            | Globular_Amphora_LN     | 1.90E-01 | 0.429               | 0.011 | 0.555            | 0.012 | 0.015  | 0.01  |
|                            | Hungary_LCA             | 1.66E-01 | 0.459               | 0.009 | 0.433            | 0.008 | 0.108  | 0.007 |
|                            | TRB_Sweden_MN           | 6.10E-01 | 0.412               | 0.015 | 0.558            | 0.016 | 0.030  | 0.013 |
|                            | France_MLN              | 3.69E-04 | 0.465               | 0.012 | 0.510            | 0.013 | 0.026  | 0.013 |

**Table S9.** Modelling Beaker Complex (BC) and Bronze Age individuals from Britain as a mixture of BB\_Netherlands\_Tui and Britain\_Neolithic.

| Individual | Population          | P-value  | Mixture proportions |                   |       | SNPs covered |
|------------|---------------------|----------|---------------------|-------------------|-------|--------------|
|            |                     |          | BB_Netherlands Tui  | Britain Neolithic | SE    |              |
| I2416      | BB_England_SOUout   | 9.99E-01 | 0.617               | 0.383             | 0.052 | 136956       |
| I2418      | BB_England_SOU      | 5.55E-01 | 1.033               | -0.033            | 0.039 | 656573       |
| I2443      | BB_England_SOU      | 1.93E-01 | 1.023               | -0.023            | 0.042 | 806658       |
| I2445      | BB_England_SOU      | 5.72E-01 | 0.921               | 0.079             | 0.04  | 854563       |
| I2446      | BB_England_SOU      | 1.50E-01 | 0.925               | 0.075             | 0.064 | 83832        |
| I2447      | BB_England_SOU      | 9.14E-01 | 1.010               | -0.010            | 0.039 | 702581       |
| I2450      | BB_England_SOU      | 6.67E-01 | 1.065               | -0.065            | 0.041 | 734749       |
| I2452      | BB_England_SOU      | 7.86E-01 | 0.967               | 0.033             | 0.039 | 913255       |
| I2453      | BB_England_SOU      | 2.96E-01 | 1.028               | -0.028            | 0.042 | 610725       |
| I2454      | BB_England_SOU      | 7.28E-01 | 1.059               | -0.059            | 0.041 | 818929       |
| I2455      | BB_England_SOU      | 8.01E-01 | 1.060               | -0.060            | 0.058 | 120698       |
| I3255      | BB_England_SOU      | 9.25E-01 | 1.021               | -0.021            | 0.042 | 861509       |
| I3256      | BB_England_SOU      | 5.22E-01 | 0.977               | 0.023             | 0.041 | 843389       |
| I2459      | BB_England_SOU      | 8.62E-01 | 1.110               | -0.110            | 0.043 | 519046       |
| I2565      | BB_England_SOU      | 5.42E-01 | 1.084               | -0.084            | 0.144 | 14794        |
| I1765_d    | BB_England_NOR      | 8.40E-01 | 1.018               | -0.018            | 0.141 | 13484        |
| I1767      | BB_England_NOR      | 7.27E-01 | 0.757               | 0.243             | 0.04  | 729987       |
| I1770      | BB_England_NOR      | 5.43E-01 | 0.908               | 0.092             | 0.041 | 483474       |
| I2612      | BB_England_NOR      | 4.74E-01 | 0.969               | 0.031             | 0.074 | 55173        |
| I2421      | England_EBA         | 5.25E-01 | 0.919               | 0.081             | 0.041 | 393274       |
| I2457      | England_EBA         | 9.18E-01 | 0.995               | 0.005             | 0.043 | 718630       |
| I2460      | England_EBA         | 7.31E-01 | 1.206               | -0.206            | 0.112 | 23341        |
| I2463      | England_EBA         | 6.17E-01 | 0.955               | 0.045             | 0.046 | 234559       |
| I2464      | England_EBA         | 3.76E-01 | 0.983               | 0.017             | 0.08  | 52649        |
| I2566      | England_EBA         | 3.96E-01 | 1.002               | -0.002            | 0.044 | 485091       |
| I2596      | England_EBA         | 2.76E-01 | 1.033               | -0.033            | 0.046 | 354928       |
| I2598      | England_EBA         | 8.16E-01 | 1.002               | -0.002            | 0.061 | 85900        |
| I2601      | England_EBA         | 3.43E-01 | 0.861               | 0.139             | 0.045 | 296184       |
| I2602      | England_EBA         | 9.25E-01 | 0.901               | 0.099             | 0.044 | 419770       |
| I2609      | England_EBA         | 4.85E-01 | 0.959               | 0.041             | 0.046 | 273312       |
| I2610      | England_EBA         | 8.81E-01 | 0.882               | 0.118             | 0.066 | 78777        |
| I2618      | England_EBA         | 2.16E-01 | 0.956               | 0.044             | 0.043 | 643010       |
| I2567      | Scotland_EBA        | 1.01E-01 | 0.967               | 0.033             | 0.041 | 589224       |
| I2568      | Scotland_EBA        | 4.75E-02 | 0.809               | 0.191             | 0.041 | 570382       |
| I2569      | Scotland_EBA        | 6.96E-01 | 0.937               | 0.063             | 0.098 | 23665        |
| I2981      | Scotland_EBA        | 1.17E-03 | 0.906               | 0.094             | 0.042 | 788384       |
| I2639      | England_EMBA        | 4.89E-01 | 0.953               | 0.047             | 0.041 | 579584       |
| I3082      | England_MBA         | 4.25E-01 | 0.847               | 0.153             | 0.038 | 582197       |
| I2574      | Wales_BA            | 5.58E-01 | 0.906               | 0.094             | 0.065 | 77807        |
| I1775      | Wales_BA            | 5.71E-01 | 0.886               | 0.114             | 0.042 | 410642       |
| I2573      | Scotland_MBA        | 4.42E-02 | 0.943               | 0.057             | 0.041 | 611500       |
| I2653      | Scotland_MBA        | 5.41E-01 | 0.926               | 0.074             | 0.041 | 574585       |
| I2654      | Scotland_MBA        | 2.02E-01 | 1.031               | -0.031            | 0.043 | 518165       |
| I2655      | Scotland_MBA        | 4.67E-01 | 0.849               | 0.151             | 0.041 | 835188       |
|            | BC and EBA combined | 4.58E-01 | 0.972               | 0.028             | 0.017 |              |
|            | MBA combined        | 3.61E-01 | 0.931               | 0.069             | 0.02  |              |

## References

1. Bronk Ramsey, C. Bayesian Analysis of Radiocarbon Dates. *Radiocarbon* **51**, 337–360 (2009).
2. Reimer, P. J. *et al.* Intcal13 and marine13 radiocarbon age calibration curves 0 – 50,000 years cal bp. *Radiocarbon* **55**, 1869–1887 (2013).
3. Allentoft, M. E. *et al.* Population genomics of Bronze Age Eurasia. *Nature* **522**, 167–172 (2015).
4. Zilhão, J. *O Paleolítico Superior da Estremadura portuguesa*. (Colibri, 1997).
5. Zilhão, J. From the Mesolithic to the Neolithic in the Iberian peninsula. In *Europe's First Farmers* 144–182 (Cambridge University Press, 2000). doi:10.1017/CBO9780511607851.007
6. Zilhão, J. The Early Neolithic artifact assemblage from the Galeria da Cisterna (Almonda karstic system, Torres Novas, Portugal). In *De Méditerranée et d'ailleurs. Mélanges offerts à Jean Guilaine* 821–835 (Archives d'Écologie Préhistorique, 2009).
7. Martins, H. *et al.* Radiocarbon dating the beginning of the Neolithic in Iberia: new results, new problems. *J. Mediterr. Archaeol.* **28**, 105–131 (2015).
8. Zilhão, J. Beaker People without Beaker Pots: the Chalcolithic Funerary Context from the Galeria da Cisterna (Almonda Karst System, Torres Novas, Portugal). In *Del neolític a l'edat del bronze en el Mediterrani occidental. Estudis en homenatge a Bernat Martí Oliver. Serie de Trabajos Varios 119, València, Servicio de Investigación Prehistórica* 379–386 (2016).
9. Belo, A. R., Trindade, L. & Veiga Ferreira, O. Gruta da Cova da Moura (Torres Vedras). In *Comunicações dos Serviços Geológicos de Portugal, XLV* 391 – 418 (1961).
10. Gallay, G. & Spindler, K. Archaeologische und Anthropologische

- Betrachtungen zu den Neolithisch-Kupferzeitlichen Funden aus der Cova da Moura /Portugal. *Madrider Mitteilungen* **11**, 35 – 58 (1970).
11. Spindler, K. Cova da Moura. In *Madrider Beitrage 7. Deutsches Archaeologisches Institut, Madrid. Mainz am Rhein, Verlag Philipp von Zabern* (1981).
  12. Silva, A. M. Antropologia Funerária e Paleopbiologia das populações Portuguesas (litorais) do Neolítico Final/Calcolítico. (Coimbra, Universidade de Coimbra, 2002).
  13. Irish, J., Lillios, K., Waterman, A. & Silva, A. M. ‘Other possibilities’? Assessing regional and extra-regional dental affinities of populations in the Portuguese Estremadura to explore the roots of Iberia’s Late Neolithic-Copper Age. *J. Archaeol. Sci. reports* **11**, 224 – 236 (2017).
  14. Silva, A. M. Portuguese Populations of the Late Neolithic and Chalcolithic Periods exhumed from Collective burials: an overview. *Anthropologie* **XLI/1-2**, 55–64 (2003).
  15. Thomas, J. T. Fashioning identities, forging inequalities: Late Neolithic/Copper Age personal ornaments of the Portuguese Extremadura. *Eur. J. Archaeol.* **14**, 29–59 (2011).
  16. Waterman, A., Tykot, R. & Silva, A. M. Stable Isotope Analysis of diet-based social differentiation at Late Prehistoric Collective burials in southwestern Portugal. *Archaeometry* **58**, 131 – 151 (2016).
  17. Waterman, A., Peate, D. W., Silva, A. M. & Thomas, J. T. In search of homelands: using strontium isotopes to identify biological markers of mobility in Late Prehistoric Portugal. *J. Archaeol. Sci.* **42**, 119–127 (2014).
  18. Francès, J., Guàrdia, M., Majó, T. & Sala, Ò. L’hipogeu calcolític del carrer de París Cerdanyola del Vallès. *Trib. d’Arqueologia* 315–333 (2007).

19. Carmona Ballester, E. & Arnaiz Alonso, M. Stratigraphic events and ‘Cycles of use’ in the dolmen of Arroyal I. In *Biografías Megalíticas. Proceedings of XVII World UISPP Congress* (eds. Rojo Guerra, M. & Tejedor-Rodríguez, C.) (2015).
20. Liesau, C., Blasco, C., Ríos, P. & Vega, J. Un espacio compartido por vivos y muertos: El poblado calcolítico de fosos de Camino de las Yeseras (San Fernando de Henares, Madrid). *Complutum* **19**, 97–120 (2008).
21. Blasco, C., Liesau, C. & Ríos, P. *Yacimientos calcolíticos con campaniforme de la región de Madrid: Nuevos estudios*. (Patrimonio Arqueológico de Madrid, 6. Universidad Autónoma de Madrid, 2011).
22. Lomba Maurandi, J., López Martínez, M., Ramos Martínez, F. & Avilés Fernández, A. El enterramiento múltiple , calcolítico , de Camino del Molino ( Caravaca , Murcia ). Metodología y primeros resultados de un yacimiento excepcional. *Trab. Prehist.* 143–159 (2009). doi:10.3989/tp.2009.09025
23. Billoin, D. Le Néolithique final : la sépulture campaniforme d’Hégenheim. In *10000 ans d’histoire ! Dix ans de fouilles archéologiques en Alsace* 31–42 (Musées de la ville de Strasbourg, 2009).
24. Billoin, D., Jeunesse, C., Denaire, A. & Thiol, S. Une nouvelle sépulture campaniforme à Hégenheim (F-Haut-Rhin). In *Du Néolithique final au Bronze ancien dans le Nord-Est de la France. Actualité de la recherche* 31–42 (APRAA, 2010).
25. Lefranc, P., Denaire, A. & Chenal, F. Une sépulture tardive du Campaniforme régional à Rouffach « Rue de Pfaffenheim » (Haut-Rhin). *Rev. Archéologique l’Est* **65**, 269–278 (2016).
26. Vergnaud, L. The Bell Beaker funeral group from Sierentz « les

- Villas d'Aurèle » (Haut-Rhin, France). In *Current researches on Bell Beakers. Proceedings of the 15th International Bell Beaker Conference: From Atlantic to Ural (5th-9th May 2011, Poio, Spain)* 51–59 (Galician ArcheoPots, 2013).
27. Vergnaud, L. Les sépultures campaniformes de Sierentz « Les Villas d'Aurèle » (Haut-Rhin). In *Données récentes sur les pratiques funéraires néolithiques de la plaine du Rhin supérieur* 173–210 (Archaeopress, 2014).
  28. Lefebvre, A., Gazenbeek, M. & Pernot, P. Les sépultures campaniformes du site de Mondelange « La Sente » (Moselle). Résultats préliminaires. *Internéo* 7, 187–201 (2008).
  29. Lefebvre, A. Les sépultures du Néolithique final / bronze ancien en Lorraine: vers l'émergence de nouvelles problématiques. In *Du Néolithique final au Bronze ancien dans le Nord-Est de la France. Actualité de la recherche* 103–118 (APRAA, 2010).
  30. Serralongue, J. & Rey, P.-J. La sépulture campaniforme de Marlens, Sur les Barmes. *La Rev. Savoisienne* **145<sup>e</sup> année**, 41–46 (2005).
  31. Lemercier, O. *et al.* La sépulture individuelle campaniforme de La Fare (Forcalquier, Alpes-de-Haute-Provence). In *Les sépultures individuelles campaniformes en France* (eds. Salanova, L. & Tcheremissinoff, Y.) 145–199 (Paris: CNRS, 2011, 2011).
  32. Sauzade, G. Caractérisation chronoculturelle du mobilier funéraire en Provence au Néolithique final et au Bronze ancien. Evolution des rites funéraires liés à l'inhumation individuelle ou collective et distribution chronologique des sépultures. *Préhistoires Méditerranéennes* 2, 71–103 (2011).
  33. Schmitt, A. & Bizot, B. Retour d'expériences sur l'étude de trois assemblages osseux issus de sépultures collectives néolithiques. *Bull. Mémoires la Société d'anthropologie Paris* **28**, 190–201 (2016).

34. Remicourt, M. *et al.* Les occupations pré- et protohistoriques du Clos de Roque à Saint-Maximin-la-Sainte-Baume dans le Var. In *Chronologie de la Préhistoire récente dans le Sud de la France – Actualité de la recherche. Toulouse : Archives d'Ecologie Préhistorique* 523–548 (2014).
35. Schmitt, A. & Bizot, B. Les inhumations du site du Clos de Roque (Saint-Maximin-la-Sainte-Baume) : de nouvelles données sur les traditions funéraires du début du Néolithique moyen dans le midi de la France. *Bull. archéologiques Provence* (2017).
36. Bernabò-Brea, M. & Mazziere, P. Nuovi dati sul campaniforme in Emilia. In *L'Età del Rame. La pianura padana e le Alpi al tempo di Ötzi* 503–524 (Compagnia della Stampa, 2013).
37. Van Giffen, A. . Settlement traces of the Early Bell Beaker Culture at Oostwoud (N.H.). *Helinium* **1**, 233–228 (1961).
38. Fokkens, H., Veselka, B., Bourgeois, Q., Olalde, I. & Reich, D. Excavations of Late Neolithic arable burial mounds and a number of well-preserved skeletons at Oostwoud-Tuithoorn; a re-analysis of old data. *Analecta Praehist. Leiden.* **47**, (2017).
39. Lanting, J. & van der Plicht, J. De 14C-chronologie van de Nederlandse pre- en protohistorie IV: bronstijd en vroege ijzertijd. *Palaeohistoria* **43–44**, 117–262 (2002).
40. Stockhammer, P. W. *et al.* Rewriting the central european early bronze age chronology: Evidence from large-Scale radiocarbon dating. *PLoS One* **10**, 1–32 (2015).
41. Heyd, V. Die Spätkupferzeit in Süddeutschland. *Saarbrücker Beiträge zur Altertumskd. 72. Bonn Habelt* **2**, 68 (2000).
42. Turek, J. & Cerný, V. Society, gender and sexual dimorphism of the Corded Ware and Bell Beaker populations. In *Bell Beakers Today. Pottery, people, culture, symbols in prehistoric Europe* (ed. Nicolis,

- F.) 601–612 (Proceedings of the International Colloquium Riva del Garda (Trento, Italy), 11–16 May 1998 (Trento), 2001).
43. Heyd, V. Die Spätkupferzeit in Süddeutschland. *Saarbrücker Beiträge zur Altertumskd. 72. Bonn Habelt* **2**, 64–65 (2000).
  44. Bertemes, F. & Heyd, V. 2200 BC – Innovation or Evolution: Genesis of the Danubian Early Bronze Age. In *2200 BC – A climatic breakdown as a cause for the collapse of the old world?* (eds. Meller, H., Risch, R., Jung, R. & Arz, H. W.) 561–578 (7th Archaeological Conference of Central Germany, October 23–26, 2014 in Halle (Saale), 2015).
  45. Heyd, V. Die Spätkupferzeit in Süddeutschland. *Saarbrücker Beiträge zur Altertumskd. 72. Bonn Habelt* **2**, 72–73 (2000).
  46. Rieder, K. H. Ein Bestattungsplatz der Glockenbecherzeit aus Oberstimm, Gemeinde Manching, Landkreis Pfaffenhofen, Oberbayern. *Das Archäologische Jahr Bayern* 40–41 (1982).
  47. Schwarz, M. Studien zur Sozialstruktur der Glockenbecherkultur im Bereich der Ostgruppe auf der Grundlage der Grabfunde. *Saarbrücker Beiträge zur Altertumskd.* **85**, 317 (2008).
  48. Heyd, V. Die Spätkupferzeit in Süddeutschland. *Saarbrücker Beiträge zur Altertumskd. 72. Bonn Habelt* **122**, (2000).
  49. Price, T. D., Knipper, C., Grupe, G. & Smrcka, V. Strontium Isotopes and Prehistoric Human Migration: The Bell Beaker Period in Central Europe. *Eur. J. Archaeol.* **7**, 9–40 (2004).
  50. Grupe, G. *et al.* Mobility of Bell Beaker people revealed by strontium isotope ratios of tooth and bone: a study of southern Bavarian skeletal remains. *Appl. Geochemistry* **12**, 517–525 (1997).
  51. Turner, W. On human and animal remains found in caves at Oban, Argyllshire. *Proc. Soc. Antiq. Scotl.* **29**, 411–438 (1895).
  52. Canmore – The online catalogue to Scotland’s archaeology,



- buildings, industrial and maritime heritage [www.canmore.org.uk](http://www.canmore.org.uk).
53. Saville, A. & Hallén, Y. The ‘Obanian Iron Age’: human remains from the Oban cave sites, Argyll, Scotland. *Antiquity* **68**, 715–723 (1994).
  54. Anderson, J. Notice of a cave recently discovered at Oban, containing human remains, and a refuse-heap of shells and bones of animals, and stone and bone implements. *Proc. Soc. Antiq. Scotl.* **29**, 211–230 (1895).
  55. Dunwell, A. Cist burials and an Iron Age settlement at Dryburn Bridge, Innerwick, East Lothian. *Scottish Archaeol. Internet Reports* **24**, (2007).
  56. Lelong, O. & MacGregor, G. The Lands of Ancient Lothian: Interpreting the Archaeology of the A1. *Edinburgh Soc. Antiq. Scotl.* (2007).
  57. Baker, L. A Bronze Age burial ground at Longniddry, East Lothian. *Proc. Soc. Antiq. Scotl.* **133**, 125–136 (2003).
  58. Sheridan, J. & Higham, T. The re-dating of some Scottish specimens by the Oxford Radiocarbon Accelerator Unit (ORAU). *Discov. Excav. Scotl.* **3**, 202–204 (2006).
  59. Barrowman, R. & Innes, L. A Bronze Age Burial from Pabay Mor, Isle of Lewis., Western Isles. *Scottish Archaeol. Internet Reports* **24**, (2009).
  60. Davidson, J. L. & Henshall, A. S. *The Chambered Cairns of Caithness*. (Edinburgh: Edinburgh University Press, 1989).
  61. Childe, V. G. Re-excavation of the chambered cairn of Quoyness, Sanday, on behalf of the Ministry of Works in 1951–52. *Proc. Soc. Antiq. Scotl.* **86**, 121–39 (1952).
  62. Armit, I. In prep. (2017).
  63. Switsur, V. R. & Harkness, D. D. The radiocarbon dates. In

- Investigations in Orkney* (ed. Renfrew, C.) 70–72 (London: Society of Antiquaries of London, 1979).
64. Sheridan, J. A. *et al.* Radiocarbon dates associated with the Scottish History and Archaeology Department, National Museums Scotland, 2011/12. *Discov. Excav. Scotl.* **13**, 200–2 (2012).
  65. Barber, J. *The Excavation of a Stalled Cairn at the Point of Cott, Westray, Orkney.* (Scottish Trust for Archaeological Research, 1997).
  66. Griffiths, S. Beside the ocean of time: a chronology of Neolithic burial monuments and houses in Orkney. In *The Development of Neolithic House Societies in Orkney* (eds. Richards, C. & Jones, R.) 254–302 (Oxford: Windgather Press, 2016).
  67. Martínková, N. *et al.* Divergent evolutionary processes associated with colonization of offshore islands. *Mol. Ecol.* **22**, 5205–5220 (2013).
  68. Bayliss, A., Marshal, P., Richards, C. & Whittle, A. The Late Neolithic timescape of Orkney: islands of history. *Submitted*
  69. Ritchie, P. R. A chambered cairn at Isbister, South Ronaldshay, Orkney. *Proc. Soc. Antiq. Scotl.* **92**, 25–32 (1959).
  70. Hedges, J. W. An archaeodemographical perspective on Isbister. *Scottish Archaeol. Rev.* **1**, 5–20 (1982).
  71. Hedges, J. W. *Isbister, a Chambered Tomb in Orkney.* (Oxford: British Archaeological Reports (British Series 115), 1983).
  72. Hedges, J. W. *Tomb of the Eagles.* (John Murray, 1984).
  73. Lawrence, D. M. Neolithic mortuary practice in Orkney. *Proc. Soc. Antiq. Scotl.* **136**, 47–60 (2006).
  74. Lawrence, D. M. & Lee-Thorp, J. New radiocarbon dates from Isbister, Orkney. *Discov. Excav. Scotl.* **13**, 203–4 (2012).
  75. Sheridan, J. A. The National Museums’ of Scotland radiocarbon dating programmes: results obtained during 2004/5. *Discov. Excav.*

- Scotl.* **6**, 182–3 (2005).
76. Renfrew, A. ., Stenhouse, M. J. & Switsur, V. R. The radiocarbon determinations. In *Isbister, a Chambered Tomb in Orkney* 61–71 (Oxford: British Archaeological Reports (British Series 115), 1983).
  77. Petrie, G. Description of antiquities in Orkney recently examined, with illustrative drawings. *Proc. Soc. Antiq. Scotl.* **2**, 56–62 (1857).
  78. Ritchie, A. *On the Fringe of Atlantic Europe: excavation of a chambered cairn on the Holm of Papa Westray, Orkney*. (Edinburgh: Society of Antiquaries of Scotland, 2009).
  79. Balasse, M. & Tresset, A. A key to the adaptation of Neolithic husbandry in the Orkneys: contribution of seaweed to the sheep diet at the Holm of Papa Westray, revealed through stable isotope analysis ( $^{13}\text{C}$  and  $^{18}\text{O}$ ) of teeth. In *On the Fringe of Atlantic Europe: excavation of a chambered cairn on the Holm of Papa Westray, Orkney* 74–83 (Edinburgh: Society of Antiquaries of Scotland, 2009).
  80. Schulting, R. J. Holm of Papa Westray North. *Discov. Excav. Scotl.* **4**, 168 (2004).
  81. Sheridan, J. A. & Higham, T. The re-dating of some Scottish specimens by the Oxford Radiocarbon Accelerator Unit (ORAU): results received during 2007. *Discov. Excav. Scotl.* **8**, 225 (2007).
  82. Ashmore, P. J. Radiocarbon dates. In *On the Fringe of Atlantic Europe: excavation of a chambered cairn on the Holm of Papa Westray, Orkney* (ed. Ritchie, A.) 59–66 (Edinburgh: Society of Antiquaries of Scotland, 2009).
  83. Schulting, R. J. & Richards, M. Radiocarbon dates and stable isotope values on human remains. In *On the Fringe of Atlantic Europe: excavation of a chambered cairn on the Holm of Papa Westray, Orkney* (ed. Ritchie, A.) 66–74 (Edinburgh: Society of Antiquaries of Scotland, 2009).

84. Corcoran, J. X. W. P. Excavation of three chambered cairns at Loch Calder, Caithness. *Proc. Soc. Antiq. Scotl.* **98**, 1–75 (1966).
85. Davidson, J. L. & Henshall, A. . *The Chambered Cairns of Orkney*. (Edinburgh: Edinburgh University Press, 1991).
86. Sharples, N. M. Radiocarbon dates from three chambered tombs at Loch Calder, Caithness. *Scottish Archaeol. Rev.* **4**, 2–10 (1986).
87. Bryce, T. On the cairns of Arran – a record of exploitations with an anatomical description of the human remains discovered. *Proc. Soc. Antiq. Scotl.* **36**, 74–181 (1902).
88. Henshall, A. S. *The Chambered Tombs of Scotland, Volume 2*. (Edinburgh: Edinburgh University Press, 1972).
89. Schulting, R. J. Clachaig. *Discov. Excav. Scotl.* **5**, 167 (2004).
90. Bonsall, C. Raschoille Cave, Oban. *Discov. Excav. Scotl. 1999* **112**, (1999).
91. Trechmann, C. T. Recent finds of prehistoric remains at Hasting Hill, near Offerton. *Antiq. Sunderl.* **14**, 1–5 (1912).
92. Trechmann, C. T. Prehistoric burials in the County of Durham. *Archaeol. Aeliana (2nd Ser.* **11**, 119–76 (1914).
93. Fowler, C. *The Emergent Past: A relational realist archaeology of Early Bronze Age mortuary practices*. (Oxford: Oxford University Press, 2013).
94. Gamble, M. & Fowler, C. A re-assessment of human skeletal remains in Tyne and Wear Museums: results and implications for interpreting Early Bronze Age burials from Northeast England and beyond. *Archaeol. Aeliana* **42**, 47–80 (2013).
95. Jobey, G., Smith, D. & Tait, J. An Early Bronze Age burial on Reaverhill Farm, Barrasford, Northumberland. *Archaeol. Aeliana* **43**, 65–75 (1965).
96. Bulmer, W. Note on two more cists at Summerhill, Blaydon. *Proc.*

- Soc. Antiq. Newcastle Upon Tyne* **16**, 260–263 (1939).
97. Annis, R. S. *et al.* An unusual group of early Bronze Age burials from Windmill Fields, Ingleby Barwick, Stockton-on-Tees. *Tees Archaeology unpublished report* (1997).
  98. Booth, T. J., Chamberlain, A. & Parker Pearson, M. Mummification in Bronze Age Britain. *Antiquity* **89**, 1155–1173 (2015).
  99. Stead, I. M. The excavation of Beaker burials at Staxton, East Riding, 1957. *Yorkshire Archaeological Journal* **40**, 129–144 (1959).
  100. Manby, T. G. Staxton Beacon: A Bronze Age barrow in East Yorkshire. *Unpublished report* (1998).
  101. Hey, G., Bell, C., Dennis, C. & Robinson, M. Yarnton Neolithic and Bronze Age settlement and landscape. *Thames Valley Landscapes Monograph* **39**, Oxford (2016).
  102. Allen, T. G. & Kamash, Z. Saved from the Grave: Neolithic to Saxon discoveries at Spring Road Municipal Cemetery, Abingdon, Oxfordshire, 1990-2000. 9–12 (2008).
  103. Fitzpatrick, A. P. *The Amesbury Archer and the Boscombe Bowmen: Bell Beaker burials on Boscombe Down, Amesbury, Wiltshire.* (Wessex Archaeology monogr 27, 2011).
  104. Barclay, A. J. & Bradley, P. J. The significance of quernstones – defining Bell Beaker ‘domestic’ burials at Amesbury Down, Wiltshire. In *Written in Stone: Papers on the Function, Form, and Provenancing of Prehistoric Stone Objects in memory of Fiona Roe* (Southampton Monographs in Archaeology, 2017).
  105. Andrews, P. *et al.* An Early Beaker funerary monument at Porton, Wiltshire. *Wiltshire Archaeological & Natural History Magazine* **109**, 38–82 (2016).
  106. Manning, A., McKinley, J. I. & Barclay, A. Early Bronze Age burial remains from Boscombe Down Airfield, Amesbury, Wiltshire.

- Wiltsh. Archaeol. Nat. Hist. Mag.* **103**, 309–312 (2010).
107. Andrews, P., Booth, P., Fitzpatrick, A. P. & Welsh, K. *Digging at the Gateway: Archaeological landscapes of south Thanet - The Archaeology of the East Kent Access (Phase II). Volume 2: The Finds, Environmental and Dating Reports.* (Oxford Wessex Archaeology monogr 8, 2015).
  108. Schulting, R. ., Gardiner, P. J., Hawkes, C. J. & Murray, E. The Mesolithic and Neolithic human bone assemblage from Totty Pot, Cheddar, Somerset. *Proceedings of the University of Bristol Speleological Society* **25**, 75–95 (2010).
  109. Gardiner, P. J. The Mesolithic-Neolithic transition in south-west England. (University of Bristol unpublished PhD thesis, 2001).
  110. Ambers, J. & Bowman, S. Radiocarbon measurement from the British Museum: datelist XXVI. *Archaeometry* **45**, 531–540 (2003).
  111. Allen, T. *et al.* Opening the Wood, Making the Land. The Archaeology of a Middle Thames Landscape: Mesolithic, Neolithic and Early Bronze Age. *Oxford Archaeol. Thames Val. Landscapes Monogr.* **38**, 337–342 (2013).
  112. Holmes, M. Archaeological excavation on land off Banbury Lane, Pineham, Northampton: assessment report and updated project design. *Northamptonshire Archaeology Unpublished Report 12/133* (2012).
  113. Caffell & Holst. Osteological analysis, Banbury Lane, Pineham, Northampton, Northamptonshire. *York Osteoarchaeology Ltd. Report No. 1713* (2013).
  114. Green, M. Cursus continuum: further discoveries in the Dorset Cursus environs, Cranborne Chase, Dorset. In *Image, Memory and Monumentality, Archaeological Engagements with the Material World* (eds. Jones, A. ., Pollard, J., Allen, M. J. & Gardiner, J.)

- (Prehistoric Society Research Paper 5., 2012).
115. Smith, M. J. *et al.* Holding on to the past: Southern British evidence for mummification and retention of the dead in the Chalcolithic and Bronze Age. *Journal of Archaeological Science: Reports* **10**, 744–756 (2016).
  116. Budziszewski, J. & Włodarczak, P. *Kultura pucharów dzwonowatych na Wyżynie Małopolskiej*. (Kraków: Instytut Archeologii i Etnologii PAN, 2010, 2010).
  117. Budziszewski, J., Haduch, E. & Włodarczak, P. Bell Beaker culture in south-eastern Poland. In *The Northeast Frontier of Bell Beakers: Proceedings of the symposium held at the Adam Mickiewicz University* (eds. Czebreszuk, J. & Szmyt, M.) 155–181 (BAR International Series 1155, Oxford: Archaeopress 2003, 2003).
  118. Fischl, K. P., Kiss, V., Kulcsár, G. & Szeverényi, V. Old and new narratives for the Carpathian Basin around 2200 BC. In *2200 BC - A climatic breakdown as a cause for the collapse of the old world? 7th Archaeological Conference of Central Germany*. (eds. Meller, H., Arz, W. H., Jung, R. & Risch, R.) 503–524 (2015).
  119. Patay, R. Bell Beaker Cemetery and Settlement at Szigetszentmiklós: First Results. In *Transitions to the Bronze Age. Interregional Interaction and Socio-Cultural Change in the Third Millennium BC Carpathian Basin and Neighbouring Regions*. (eds. Heyd, V., Kulcsár, G. & Szeverényi, V.) 287–317 (2013).
  120. Szécsényi-Nagy, A. *et al.* Tracing the genetic origin of Europe's first farmers reveals insights into their social organization. *Proc. R. Soc. B-Biological Sci.* **282**, 1–9 (2015).
  121. Dabney, J. *et al.* Complete mitochondrial genome sequence of a Middle Pleistocene cave bear reconstructed from ultrashort DNA fragments. *Proc. Natl. Acad. Sci. U. S. A.* **110**, 15758–63 (2013).

122. Lazaridis, I. *et al.* Genomic insights into the origin of farming in the ancient Near East. *Nature* **536**, 1–22 (2016).
123. Rohland, N., Harney, E., Mallick, S., Nordenfelt, S. & Reich, D. Partial uracil – DNA – glycosylase treatment for screening of ancient DNA. *Philos. Trans. R. Soc. London B* (2015).  
doi:10.1098/rstb.2013.0624
124. Haak, W. *et al.* Massive migration from the steppe was a source for Indo-European languages in Europe. *Nature* **522**, 207–211 (2015).
125. Meyer, M. & Kircher, M. Illumina Sequencing Library Preparation for Highly Multiplexed Target Capture and Sequencing. *Cold Spring Harb. Protoc.* <http://dx.doi.org/10.1101/prot5448> (2010).  
doi:<http://dx.doi.org/10.1101/prot5448>
126. Kircher, M., Sawyer, S. & Meyer, M. Double indexing overcomes inaccuracies in multiplex sequencing on the Illumina platform. *Nucleic Acids Res.* **40**, 1–8 (2012).
127. Damgaard, P. B. *et al.* Improving access to endogenous DNA in ancient bones and teeth. *Sci. Rep.* **5**, 11184 (2015).
128. Maricic, T., Whitten, M. & Pääbo, S. Multiplexed DNA sequence capture of mitochondrial genomes using PCR products. *PLoS One* **5**, e14004 (2010).
129. Fu, Q. *et al.* DNA analysis of an early modern human from Tianyuan Cave, China. *Proc. Natl. Acad. Sci. U. S. A.* **110**, 2223–7 (2013).
130. Keller, A. *et al.* New insights into the Tyrolean Iceman’s origin and phenotype as inferred by whole-genome sequencing. *Nat. Commun.* **3**, 698 (2012).
131. Gamba, C. *et al.* Genome flux and stasis in a five millennium transect of European prehistory. *Nat. Commun.* **5**, 5257 (2014).
132. Skoglund, P. *et al.* Genomic Diversity and Admixture Differs for Stone-Age Scandinavian Foragers and Farmers. *Science* **201**, 786–



- 792 (2014).
133. Patterson, N. *et al.* Ancient admixture in human history. *Genetics* **192**, 1065–93 (2012).
  134. Busing, F. M. T. A., Meijer, E. & Van Der Leeden, R. Delete- m Jackknife for Unequal m. *Stat. Comput.* **9**, 3–8 (1999).
  135. Lipson, M. *et al.* Parallel ancient genomic transects reveal complex population history of early European farmers. *bioRxiv* (2017).
